# Supplementary material for: Genome-Wide Screen in Saccharomyces cerevisiae Identifies Vacuolar Protein Sorting, Autophagy, Biosynthetic, and tRNA Methylation Genes Involved in Life Span Regulation
Source: PLoS Genet. 2010 Jul 15;6(7):e1001024. doi: 10.1371/journal.pgen.1001024 (PMC2904796; doi:10.1371/journal.pgen.1001024)
Supplement: Table S1 — CFUs values relative to the survival of the two YKO pools used for the genome-wide screen. (0.02 MB XLS) [file pgen.1001024.s005.xls]

## Sheet: Sheet1
Table S1. CFUs values relative to the survival of the two YKO pools used for the genome-wide screen.
Pool	Time (day)
	3	5	7	9	11	12	14	15	17	20	22
YKO(1)	149.5	109.5	75	56	29.5	45.5	16.5	23	8	10	2	CFUs x106/mL
YKO(2)	149.5	133.5	53	24.5	22	29	14	20.5	13	9	7.5
	3	5	7	9	11	12	14	15	17	20	22
YKO(1)	100	73.2441	50.1672	37.4582	19.7324	30.4348	11.0368	15.3846	5.35117	6.68896	1.33779	% survival
YKO(2)	100	89.2977	35.4515	16.388	14.7157	19.398	9.36455	13.7124	8.69565	6.02007	5.01672
