# Supplementary material for: Genome-Wide Screen in Saccharomyces cerevisiae Identifies Vacuolar Protein Sorting, Autophagy, Biosynthetic, and tRNA Methylation Genes Involved in Life Span Regulation
Source: PLoS Genet. 2010 Jul 15;6(7):e1001024. doi: 10.1371/journal.pgen.1001024 (PMC2904796; doi:10.1371/journal.pgen.1001024)
Supplement: Table S2 — Mutant-specific aging profiles were obtained by calculating the log2 ratios for each time point using day 3 as a reference (see Materials and Methods). Data from both biological replicates and their average are shown. The root squared mean error (RSME) between the two replicates is also shown. The last column on the right indicates whether the corresponding mutants were included in the K-means clustering analysis. (1.35 MB XLS) [file pgen.1001024.s006.xls]

## Sheet: SuppleTable2_v2.txt
Table S2. Mutant-specific aging profiles were obtained by calculating the log2 ratios for each time point using day 3 as a reference (see Methods). Data from both biological replicates and their average are shown. The root squared mean error (RSME) between the two replicates is also shown. 1/0 in column Q indicates whether the corresponding mutant was included in the K-means clustering analysis.
ORF	GENE	RMSE	Correlation	yko1d9/yko1d3	yko1d11/yko1d3	yko1d15/yko1d3	yko1d20/yko1d3	yko2d9/yko2d3	yko2d11/yko2d3	yko2d15/yko2d3	yko2d20/yko2d3	Avg(d9/d3)	Avg(d11/d3)	Avg(d15/d3)	Avg(d20/d3)	Used for Clustering
YER107C	GLE2	2.16496	0.895598	0.232	0.349	1.939	3.201	-0.45	2.509	2.842	6.779	-0.109	1.429	2.3905	4.99	0
YDR463W	STP1	3.0982	0.578208	0.407	0.479	3.732	1.522	0.35	4.112	5.383	6.262	0.3785	2.2955	4.5575	3.892	0
YMR275C	BUL1	0.476648	0.984977	2.028	2.659	3.375	3.58	1.431	2.222	2.806	3.386	1.7295	2.4405	3.0905	3.483	1
YDR443C	SSN2	0.967582	0.869372	-0.472	0.157	2.811	3.494	-0.078	2.018	2.5	3.322	-0.275	1.0875	2.6555	3.408	1
YOR061W	CKA2	0.284371	0.927151	0.943	1.242	1.686	2.299	0.594	1.55	2.005	2.37	0.7685	1.396	1.8455	2.3345	1
YOR014W	RTS1	2.5678	-0.47591	2.039	2.079	-0.701	0.498	1.276	2.833	2.803	4.096	1.6575	2.456	1.051	2.297	0
YDR442W	YDR442W	1.1569	0.798529	0.208	0.222	1.148	1.6	-0.047	1.824	2.112	2.939	0.0805	1.023	1.63	2.2695	1
YBR151W	APD1	0.572225	0.914237	-0.124	-0.068	1.76	1.958	0.072	0.995	1.762	2.334	-0.026	0.4635	1.761	2.146	1
YPL177C	CUP9	0.28627	0.941532	0.122	0.435	1.73	2.09	0.039	0.819	1.314	2.07	0.0805	0.627	1.522	2.08	1
YOR140W	SFL1	0.601106	0.938257	0.158	0.4	0.523	1.738	0.174	0.822	1.423	2.414	0.166	0.611	0.973	2.076	1
YLR024C	UBR2	1.20199	0.712127	0.125	-0.099	1.221	0.911	-0.167	1.254	2.024	2.705	-0.021	0.5775	1.6225	1.808	0
YHR139C-A	YHR139C-A	1.8457	0.848465	0.213	2.575	0.083	3.193	0.116	0.159	-0.071	0.408	0.1645	1.367	0.006	1.8005	0
YBR046C	ZTA1	0.687331	0.947104	0.196	0.433	1.505	2.179	-0.009	0.057	0.467	1.386	0.0935	0.245	0.986	1.7825	1
YMR052W	FAR3	0.310367	0.973293	0.266	0.479	1.457	1.805	0.57	0.988	1.619	1.718	0.418	0.7335	1.538	1.7615	1
YLR150W	STM1	2.10288	0.629665	-0.172	-0.986	0.289	-0.04	0.393	0.339	2.181	3.429	0.1105	-0.3235	1.235	1.6945	0
YFR008W	FAR7	0.487737	0.951666	0.033	0.04	1.077	1.518	0.44	0.847	1.422	1.643	0.2365	0.4435	1.2495	1.5805	1
YGL094C	PAN2	0.373678	0.957625	0.144	0.383	1.579	1.675	0.052	0.37	0.911	1.353	0.098	0.3765	1.245	1.514	1
YDR417C	YDR417C	0.424384	0.815253	-0.224	1.226	0.505	1.706	-0.146	0.855	1.156	1.315	-0.185	1.0405	0.8305	1.5105	1
YJL134W	LCB3	0.275719	0.908087	0.222	0.314	0.579	1.487	0.177	0.533	1.083	1.496	0.1995	0.4235	0.831	1.4915	1
YNL025C	SSN8	1.38411	0.415461	-0.787	0.376	-0.377	1.591	-0.675	1.811	1.962	1.244	-0.731	1.0935	0.7925	1.4175	0
YOR012W	YOR012W	0.359517	0.984453	0.065	0.253	0.959	1.158	0.131	0.636	1.301	1.657	0.098	0.4445	1.13	1.4075	1
YDR102C	YDR102C	1.15346	0.366944	-0.062	1.799	0.217	2.126	-0.01	0.02	0.457	0.678	-0.036	0.9095	0.337	1.402	1
YLR182W	SWI6	1.09621	0.809693	-0.953	-0.454	-0.729	0.524	-0.328	-1.595	-1.005	2.267	-0.6405	-1.0245	-0.867	1.3955	1
YML014W	TRM9	1.1943	-0.488777	2.661	1.909	0.337	2.044	1.581	1.155	1.848	0.745	2.121	1.532	1.0925	1.3945	1
YLR238W	FAR10	0.520368	0.997108	0.031	0.224	0.7	1.021	0.312	0.663	1.225	1.753	0.1715	0.4435	0.9625	1.387	1
YNL127W	FAR11	0.685729	0.96049	0.014	0.393	1.158	1.14	0.616	1.21	1.947	1.618	0.315	0.8015	1.5525	1.379	1
YMR029C	FAR8	0.359027	0.987294	0.028	-0.059	1.028	1.391	0.41	0.531	1.172	1.362	0.219	0.236	1.1	1.3765	1
YMR167W	MLH1	1.15441	0.75002	0.034	-0.083	0.482	0.71	-0.327	1.106	1.909	2.033	-0.1465	0.5115	1.1955	1.3715	1
YOL089C	HAL9	0.469871	0.688836	0.35	0.451	0.331	1.231	0.207	0.777	1.164	1.481	0.2785	0.614	0.7475	1.356	1
YOR297C	TIM18	1.33934	-0.056904	0.514	1.226	-1.247	1.886	-0.524	0.204	0.694	0.752	-0.005	0.715	-0.2765	1.319	0
YNR032W	PPG1	0.12394	0.977599	0.032	0.541	0.891	1.35	0.228	0.477	1.007	1.276	0.13	0.509	0.949	1.313	1
YPL135W	ISU1	1.17092	0.287837	-0.465	1.499	-1.308	1.411	0.036	0.126	0.498	1.117	-0.2145	0.8125	-0.405	1.264	1
YPL113C	YPL113C	0.863444	0.225499	0.209	0.129	0.296	1.287	0.111	1.812	-0.072	1.219	0.16	0.9705	0.112	1.253	1
YLL029W	YLL029W	1.82429	-0.45319	-0.063	2.746	-0.141	2.431	-0.008	-0.013	0.229	0.073	-0.0355	1.3665	0.044	1.252	0
YGR037C	ACB1	0.369879	0.913662	0.276	0.713	0.778	1.549	0.194	0.296	0.683	0.951	0.235	0.5045	0.7305	1.25	1
YKR090W	PXL1	0.12344	0.960556	0.221	0.431	0.723	1.252	0.126	0.528	0.927	1.222	0.1735	0.4795	0.825	1.237	1
YKL171W	YKL171W	0.193234	0.999629	0.193	0.334	0.719	1.055	0.165	0.379	0.891	1.397	0.179	0.3565	0.805	1.226	1
YDR199W	YDR199W	0.189273	0.984309	0.022	0.435	0.757	1.106	0.25	0.486	0.983	1.3	0.136	0.4605	0.87	1.203	1
YMR052C-A	YMR052C-A	0.510975	0.889193	-0.037	0.199	1.129	1.172	0.436	0.976	1.591	1.231	0.1995	0.5875	1.36	1.2015	1
YPL112C	PEX25	0.311105	0.878789	-0.003	0.291	0.587	1.193	-0.114	0.631	1.096	1.205	-0.0585	0.461	0.8415	1.199	1
YHR124W	NDT80	2.99632	-0.066869	-0.425	-0.792	-3.988	-0.342	-0.522	-0.023	1.095	2.736	-0.4735	-0.4075	-1.4465	1.197	0
YEL003W	GIM4	1.88178	0.186379	1.605	2.058	0.371	0.892	-0.739	-0.053	-1.593	1.489	0.433	1.0025	-0.611	1.1905	0
YPR060C	ARO7	0.626009	0.435191	1.271	1.866	2.029	1.148	0.667	0.855	1.612	1.23	0.969	1.3605	1.8205	1.189	1
YFR044C	DUG1	0.350442	0.936518	0.205	0.199	0.576	0.916	-0.083	0.457	0.807	1.453	0.061	0.328	0.6915	1.1845	1
YFR032C-A	RPL29	0.935394	0.698717	0.869	1.294	0.214	1.714	-0.061	0.111	0.085	0.61	0.404	0.7025	0.1495	1.162	1
YJR070C	LIA1	0.217581	0.990139	-0.149	0.32	0.785	1.027	0.108	0.415	1.019	1.271	-0.0205	0.3675	0.902	1.149	1
YEL057C	YEL057C	0.876252	0.845065	0.014	0.342	1.476	1.795	0.205	0.344	0.345	0.47	0.1095	0.343	0.9105	1.1325	1
YML062C	MFT1	0.181504	0.996326	0.087	0.07	0.558	1.003	0.23	0.248	0.687	1.254	0.1585	0.159	0.6225	1.1285	1
YMR022W	QRI8	0.358717	0.970181	-0.064	-0.285	0.483	1	0.142	0.243	0.849	1.244	0.039	-0.021	0.666	1.122	1
YIL052C	RPL34B	0.87782	0.702234	-0.28	-0.268	-0.504	0.858	0.212	0.436	0.938	1.373	-0.034	0.084	0.217	1.1155	1
YDL230W	PTP1	0.802426	0.830855	0.203	0.084	0.284	0.572	0.395	0.723	1.281	1.638	0.299	0.4035	0.7825	1.105	1
YHR115C	DMA1	1.3982	0.125023	-0.035	-0.492	-0.564	-0.239	-0.428	-0.478	0.221	2.416	-0.2315	-0.485	-0.1715	1.0885	0
YLR398C	SKI2	0.226017	0.943079	0.303	0.331	0.9	0.85	0.318	0.475	0.993	1.268	0.3105	0.403	0.9465	1.059	1
YDR101C	ARX1	0.95398	0.766536	-0.975	1.109	0.855	1.593	-0.284	-0.14	0.223	0.496	-0.6295	0.4845	0.539	1.0445	1
YGL139W	FLC3	0.189137	0.994818	0.133	0.27	0.604	1.129	-0.022	0.018	0.453	0.948	0.0555	0.144	0.5285	1.0385	1
YKL048C	ELM1	1.26247	-0.535484	0.169	1.265	0.168	1.984	0.893	1.73	1.595	0.087	0.531	1.4975	0.8815	1.0355	0
YJR131W	MNS1	0.133838	0.994769	0.227	0.383	0.76	1.14	0.292	0.456	0.68	0.904	0.2595	0.4195	0.72	1.022	1
YOL155C	HPF1	0.707476	0.842028	0.087	-0.084	0.478	0.553	0.14	0.636	1.309	1.442	0.1135	0.276	0.8935	0.9975	1
YCR030C	SYP1	0.209056	0.962784	0.111	0.111	0.62	0.87	0.06	0.371	0.83	1.116	0.0855	0.241	0.725	0.993	1
YHR167W	THP2	0.561818	0.720999	0.016	-0.342	0.352	0.692	0.187	0.568	0.623	1.268	0.1015	0.113	0.4875	0.98	1
YDR179C	CSN9	0.445647	0.637961	0.123	0.492	0.261	0.617	0.109	0.177	0.688	1.333	0.116	0.3345	0.4745	0.975	1
YPR092W	YPR092W	0.398739	0.850222	0.128	0.157	0.313	1.363	0.036	0.069	0.412	0.582	0.082	0.113	0.3625	0.9725	1
YKL046C	DCW1	0.650862	0.75952	0.137	0.077	0.106	0.521	0.185	0.38	1.008	1.408	0.161	0.2285	0.557	0.9645	1
YKL068W	NUP100	0.453173	0.755049	0.072	-0.438	0.495	0.82	-0.023	0.359	0.818	1.09	0.0245	-0.0395	0.6565	0.955	1
YMR311C	GLC8	1.25606	0.468363	0.071	-0.071	0.051	0.134	0.65	1.01	1.505	1.775	0.3605	0.4695	0.778	0.9545	0
YJL064W	YJL064W	0.474637	0.394664	0.331	0.404	0.64	1.182	0.408	0.4	-0.189	0.726	0.3695	0.402	0.2255	0.954	1
YBR146W	MRPS9	0.704219	0.150118	0.735	0.322	-0.038	1.295	-0.292	-0.099	0.487	0.605	0.2215	0.1115	0.2245	0.95	1
YER109C	FLO8	0.166368	0.995494	0.099	0.265	0.565	0.832	0.082	0.333	0.795	1.062	0.0905	0.299	0.68	0.947	1
YML032C	RAD52	1.80008	-0.227499	2.842	1.075	0.433	1.874	0.197	-0.475	0.754	0.014	1.5195	0.3	0.5935	0.944	0
YNL068C	FKH2	0.491156	0.888885	0.195	0.241	0.167	0.489	0.178	0.2	0.544	1.395	0.1865	0.2205	0.3555	0.942	1
YJL153C	INO1	0.537674	0.877447	-0.94	-0.31	-0.551	1.37	-1.54	-0.4	-0.319	0.513	-1.24	-0.355	-0.435	0.9415	1
YGR200C	ELP2	0.994231	0.271854	0.977	1.563	1.587	1.657	0.283	1.248	0.442	0.221	0.63	1.4055	1.0145	0.939	1
YMR034C	YMR034C	0.144548	0.972038	0.206	0.201	0.634	1.031	0.288	0.173	0.442	0.833	0.247	0.187	0.538	0.932	1
YOR131C	YOR131C	0.469794	0.911751	0.105	0.045	0.331	0.463	0.106	0.205	0.512	1.371	0.1055	0.125	0.4215	0.917	1
YNL248C	RPA49	1.69886	0.496413	-0.094	1.211	1.946	1.55	-1.285	0.339	-0.837	0.277	-0.6895	0.775	0.5545	0.9135	0
YLR335W	NUP2	0.276508	0.842213	-0.14	-0.064	0.76	1.019	-0.351	0.359	0.571	0.803	-0.2455	0.1475	0.6655	0.911	1
YJR133W	XPT1	0.047051	0.998609	0.135	0.134	0.45	0.954	0.113	0.131	0.441	0.863	0.124	0.1325	0.4455	0.9085	1
YJR039W	YJR039W	0.352762	0.947293	0.084	0.157	0.228	0.608	0.036	-0.059	-0.07	1.208	0.06	0.049	0.079	0.908	1
YBL039C	URA7	1.55538	0.418783	1.689	1.07	-0.024	2.062	-0.15	0.536	-0.819	-0.257	0.7695	0.803	-0.4215	0.9025	0
YKR095W	MLP1	0.197865	0.933605	0.173	0.236	0.278	0.769	0.101	0.115	0.542	1.028	0.137	0.1755	0.41	0.8985	1
YGL026C	TRP5	2.26021	-0.074696	2.286	2.31	2.079	1.485	0.451	0.154	-1.243	0.309	1.3685	1.232	0.418	0.897	0
YBR147W	YBR147W	0.749217	0.946571	-0.136	-0.034	0.026	0.339	0.003	0.432	0.921	1.438	-0.0665	0.199	0.4735	0.8885	1
YGL133W	ITC1	0.588218	0.202948	0.341	0.606	0.763	1.325	0.337	0.395	0.016	0.441	0.339	0.5005	0.3895	0.883	1
YLR388W	RPS29A	1.07865	-0.44802	1.185	0.197	-0.628	0.561	-0.372	-0.01	0.708	1.195	0.4065	0.0935	0.04	0.878	1
YDR097C	MSH6	0.276216	0.99489	0.152	0.244	0.479	0.626	0.034	0.237	0.682	1.126	0.093	0.2405	0.5805	0.876	1
YAL014C	SYN8	0.254248	0.921443	0.062	-0.284	0.391	0.898	0.104	0.146	0.655	0.851	0.083	-0.069	0.523	0.8745	1
YKL010C	UFD4	0.118268	0.951297	0.011	0.07	0.694	0.819	0.041	0.023	0.488	0.921	0.026	0.0465	0.591	0.87	1
YKL050C	YKL050C	0.431899	0.718545	0.091	0.233	0.397	0.43	0.134	0.206	0.334	1.29	0.1125	0.2195	0.3655	0.86	1
YPL056C	YPL056C	0.067794	0.982718	-0.016	0.273	0.637	0.846	0.066	0.283	0.531	0.864	0.025	0.278	0.584	0.855	1
YOR138C	RUP1	0.925506	0.146868	0.099	-0.115	-0.779	0.162	-0.494	-0.13	0.309	1.537	-0.1975	-0.1225	-0.235	0.8495	1
YDR206W	EBS1	0.160572	0.881404	-0.005	0.45	0.456	0.8	0.045	0.203	0.632	0.893	0.02	0.3265	0.544	0.8465	1
YMR193W	MRPL24	0.881505	0.666179	-0.004	-0.324	1.03	0.097	-0.565	0.065	1.661	1.595	-0.2845	-0.1295	1.3455	0.846	1
YOR271C	FSF1	0.479013	0.835006	0.15	0.246	0.597	0.427	0.229	0.455	1.004	1.265	0.1895	0.3505	0.8005	0.846	1
YDR089W	YDR089W	0.093272	0.965928	0.057	0.108	0.39	0.91	0.104	0.039	0.488	0.775	0.0805	0.0735	0.439	0.8425	1
YML028W	TSA1	0.445102	0.786097	-0.155	-0.405	0.958	1.073	-0.443	0.152	0.528	0.61	-0.299	-0.1265	0.743	0.8415	1
YPL071C	YPL071C	0.483082	0.838612	0.308	0.253	0.682	1.136	0.011	0.073	0.002	0.544	0.1595	0.163	0.342	0.84	1
YKR028W	SAP190	0.534987	0.852889	0.106	0.362	1.108	1.151	-0.088	0.229	0.272	0.526	0.009	0.2955	0.69	0.8385	1
YLR402W	YLR402W	1.5364	-0.212086	1.975	1.389	1.518	1.881	0.485	0.467	0.098	-0.206	1.23	0.928	0.808	0.8375	0
YLR264W	RPS28B	1.8814	-0.921378	1.347	1.159	0.486	2.474	0.287	-0.146	1.252	-0.804	0.817	0.5065	0.869	0.835	0
YML029W	USA1	0.434801	0.82461	0.125	-0.03	0.704	1.223	0.208	0.249	0.49	0.432	0.1665	0.1095	0.597	0.8275	1
YBR274W	CHK1	0.554252	0.932843	-0.166	-0.243	0.44	0.404	0.088	0.258	0.903	1.24	-0.039	0.0075	0.6715	0.822	1
YML048W	GSF2	0.846387	0.208507	0.313	0.356	1.178	1.395	0.235	-0.054	0.011	0.242	0.274	0.151	0.5945	0.8185	1
YJR055W	HIT1	1.25689	0.907943	0.992	0.842	0.395	1.709	-0.229	-0.169	-0.355	-0.092	0.3815	0.3365	0.02	0.8085	0
YJL059W	YHC3	0.735156	0.712294	0.054	-0.406	0.039	0.157	0.434	0.087	0.351	1.452	0.244	-0.1595	0.195	0.8045	1
YNR070W	YNR070W	3.4359	0.817951	-2.133	-1.317	-1.202	-1.552	-0.892	1.754	2.546	3.16	-1.5125	0.2185	0.672	0.804	0
YBL042C	FUI1	2.89805	-0.71648	2.127	2.463	0.464	2.535	-0.46	-1.306	-0.367	-0.93	0.8335	0.5785	0.0485	0.8025	0
YOR304W	ISW2	0.42622	0.52418	0.178	0.29	0.613	1.147	0.283	0.292	0.138	0.447	0.2305	0.291	0.3755	0.797	1
YJR014W	TMA22	0.782315	0.92849	0.121	0.341	0.676	1.389	-0.179	-0.291	-0.067	0.203	-0.029	0.025	0.3045	0.796	1
YLR372W	SUR4	1.25943	-0.043803	-0.84	0.314	-0.576	0.165	-0.487	-1.068	1.074	1.425	-0.6635	-0.377	0.249	0.795	0
YOR001W	RRP6	2.06575	-0.450572	1.294	0.253	0.309	2.461	-0.769	0.109	-0.986	-0.873	0.2625	0.181	-0.3385	0.794	0
YOR155C	ISN1	0.540853	0.471655	-0.038	0.185	0.392	1.268	-0.145	-0.219	0.703	0.32	-0.0915	-0.017	0.5475	0.794	1
YKR027W	BCH2	0.905143	0.163046	0.825	0.462	0.093	0.707	0.083	-1.169	0.284	0.88	0.454	-0.3535	0.1885	0.7935	1
YER095W	RAD51	0.787738	0.752539	-0.411	-0.892	0.176	1.356	0.175	0.033	0.084	0.227	-0.118	-0.4295	0.13	0.7915	1
YAL027W	YAL027W	0.230398	0.988218	0.092	-0.239	0.085	0.64	0.23	0.013	0.296	0.932	0.161	-0.113	0.1905	0.786	1
YAL060W	BDH1	0.186739	0.956125	0.172	-0.053	0.225	0.744	0.237	0.198	0.481	0.826	0.2045	0.0725	0.353	0.785	1
YJL073W	JEM1	0.258201	0.915197	-0.073	0.126	0.554	0.563	0.114	0.31	0.612	1.004	0.0205	0.218	0.583	0.7835	1
YLR327C	TMA10	0.154843	0.907956	0.1	0.094	0.316	0.913	0.13	-0.011	0.446	0.654	0.115	0.0415	0.381	0.7835	1
YCL014W	BUD3	0.204509	0.925114	-0.021	0.18	0.103	0.607	0.09	-0.002	0.096	0.956	0.0345	0.089	0.0995	0.7815	1
YOR156C	NFI1	0.81682	0.789695	0.257	0.271	1.192	1.417	0.1	0.111	0.193	0.144	0.1785	0.191	0.6925	0.7805	1
YPL107W	YPL107W	0.77408	-0.061882	0.059	0.012	-0.732	0.866	-0.167	0.147	0.784	0.695	-0.054	0.0795	0.026	0.7805	1
YER141W	COX15	2.66779	0.779412	-0.117	2.012	0.289	2.618	-1.437	-1.272	-1.231	-1.074	-0.777	0.37	-0.471	0.772	0
YML103C	NUP188	0.282954	0.828927	0.091	0.412	0.691	1.008	0.246	0.195	0.544	0.531	0.1685	0.3035	0.6175	0.7695	1
YDR418W	RPL12B	1.58557	-0.15328	-0.983	0.182	1.88	2.151	0.091	0.714	0.907	-0.619	-0.446	0.448	1.3935	0.766	0
YLR090W	XDJ1	0.88175	0.561981	-0.191	-0.436	-0.482	0.426	0.232	0.386	0.857	1.106	0.0205	-0.025	0.1875	0.766	1
YHR082C	KSP1	0.624426	0.918819	-0.33	-0.79	-0.285	0.534	0.029	0.065	0.413	0.995	-0.1505	-0.3625	0.064	0.7645	1
YDR068W	DOS2	0.09488	0.977322	0.039	0.135	0.383	0.783	0.145	0.183	0.528	0.745	0.092	0.159	0.4555	0.764	1
YOR239W	ABP140	0.42035	0.504577	0.095	0.343	0.427	0.824	0.1	0.091	1.22	0.704	0.0975	0.217	0.8235	0.764	1
YMR241W	YHM2	0.134496	0.968624	0.195	0.195	0.455	0.863	0.171	0.229	0.28	0.663	0.183	0.212	0.3675	0.763	1
YDR191W	HST4	0.186678	0.94816	0.103	0.091	0.307	0.831	-0.009	0.024	-0.014	0.692	0.047	0.0575	0.1465	0.7615	1
YNL024C	YNL024C	0.064568	0.997191	0.077	0.078	0.458	0.795	0.13	0.171	0.431	0.728	0.1035	0.1245	0.4445	0.7615	1
YPL099C	FMP14	0.549767	0.548888	0.099	0.101	0.359	0.229	0.056	0.23	0.605	1.292	0.0775	0.1655	0.482	0.7605	1
YMR297W	PRC1	0.105568	0.965264	0.113	0.315	0.641	0.731	0.072	0.142	0.543	0.789	0.0925	0.2285	0.592	0.76	1
YLL013C	PUF3	0.615761	0.798089	-0.071	0.031	0.91	1.313	-0.047	-0.191	0.421	0.205	-0.059	-0.08	0.6655	0.759	1
YDL046W	NPC2	0.277529	0.876912	-0.076	0.495	0.3	0.937	0.055	0.108	0.186	0.579	-0.0105	0.3015	0.243	0.758	1
YPL199C	YPL199C	0.175691	0.895641	0.148	0.001	0.527	0.826	0.21	0.246	0.327	0.686	0.179	0.1235	0.427	0.756	1
YCR105W	ADH7	0.15535	0.875983	0.094	0.211	0.516	0.619	0.149	0.189	0.38	0.892	0.1215	0.2	0.448	0.7555	1
YPL057C	SUR1	0.828654	0.852161	0.033	0.018	0.167	0.125	0.226	0.508	1.106	1.385	0.1295	0.263	0.6365	0.755	1
YPR039W	YPR039W	0.323349	0.993927	0.117	0.172	0.429	0.497	0.21	0.33	0.776	1.011	0.1635	0.251	0.6025	0.754	1
YKL029C	MAE1	0.165803	0.982158	0.091	0.136	0.532	0.599	0.09	0.201	0.642	0.905	0.0905	0.1685	0.587	0.752	1
YDL018C	ERP3	0.586709	0.024698	0.132	0.221	0.185	0.18	0.107	0.087	0.432	1.319	0.1195	0.154	0.3085	0.7495	1
YDR408C	ADE8	0.425136	0.943741	-0.041	0.649	0.627	0.967	-0.171	0.157	0.107	0.527	-0.106	0.403	0.367	0.747	1
YBL106C	SRO77	0.221248	0.855134	-0.003	-0.16	0.58	0.77	0.125	0.136	0.281	0.721	0.061	-0.012	0.4305	0.7455	1
YIL030C	SSM4	0.083948	0.959291	0.077	0.058	0.281	0.771	0.019	0.003	0.415	0.709	0.048	0.0305	0.348	0.74	1
YOR104W	PIN2	0.88124	-0.194218	0.298	-0.324	0.294	-0.121	-0.056	-0.162	0.237	1.597	0.121	-0.243	0.2655	0.738	1
YPR042C	PUF2	0.238502	0.92763	0.148	0.129	0.441	0.502	0.15	0.167	0.513	0.972	0.149	0.148	0.477	0.737	1
YBR016W	YBR016W	0.296909	0.814051	0.029	0.32	0.535	0.994	0.166	0.087	0.434	0.475	0.0975	0.2035	0.4845	0.7345	1
YML053C	YML053C	0.123731	0.936625	0.139	0.086	0.491	0.786	0.219	0.198	0.313	0.683	0.179	0.142	0.402	0.7345	1
YBR111C	YSA1	2.09997	0.118307	-0.12	-1.613	-1.614	-0.193	0.517	0.085	1.694	1.653	0.1985	-0.764	0.04	0.73	0
YAL068C	PAU8	0.27233	0.99472	-0.264	-0.825	0.198	0.849	-0.069	-0.386	0.128	0.602	-0.1665	-0.6055	0.163	0.7255	1
YNL021W	HDA1	0.137427	0.926634	0.005	0.447	0.518	0.725	-0.007	0.189	0.424	0.726	-0.001	0.318	0.471	0.7255	1
YDL227C	HO	0.284904	0.658528	0.016	0.389	0.293	0.91	-0.022	0.02	0.517	0.54	-0.003	0.2045	0.405	0.725	1
YDR221W	GTB1	0.365749	0.982608	0.123	0.3	0.555	0.941	-0.095	-0.025	0.119	0.503	0.014	0.1375	0.337	0.722	1
YDR136C	VPS61	1.92651	-0.35904	2.568	2.037	1.803	1.994	0.213	0.408	1.398	-0.552	1.3905	1.2225	1.6005	0.721	0
YGL148W	ARO2	2.15361	-0.260847	-0.12	1.969	0.338	2.503	1.043	0.632	-1.306	-1.062	0.4615	1.3005	-0.484	0.7205	0
YAL061W	YAL061W	0.166029	0.932077	0.069	-0.042	0.546	0.619	0.214	0.173	0.499	0.821	0.1415	0.0655	0.5225	0.72	1
YPL245W	YPL245W	0.232253	0.952628	0.024	0.264	0.26	0.937	0.119	0.135	0.262	0.501	0.0715	0.1995	0.261	0.719	1
YDR010C	YDR010C	0.086189	0.97694	0.086	0.244	0.421	0.798	0.026	0.232	0.428	0.637	0.056	0.238	0.4245	0.7175	1
YLR280C	YLR280C	0.203741	0.978217	0.157	0.155	0.408	0.883	0.021	-0.003	0.303	0.549	0.089	0.076	0.3555	0.716	1
YNL334C	SNO2	0.072686	0.962487	0.029	0.321	0.431	0.724	0.149	0.241	0.434	0.706	0.089	0.281	0.4325	0.715	1
YGR086C	PIL1	0.219498	0.706883	0.661	0.087	0.618	0.809	0.512	0.448	0.682	0.619	0.5865	0.2675	0.65	0.714	1
YBR085W	AAC3	0.312608	0.79035	0.103	0.345	0.481	0.982	0.18	0.067	0.35	0.443	0.1415	0.206	0.4155	0.7125	1
YLR282C	YLR282C	0.456427	0.747301	0.204	0.425	0.615	0.931	-0.014	0.101	-0.083	0.491	0.095	0.263	0.266	0.711	1
YJL135W	YJL135W	0.260669	0.739457	-0.038	0.022	0.343	0.816	-0.053	0.2	0.785	0.605	-0.0455	0.111	0.564	0.7105	1
YMR030W	RSF1	1.1524	0.737881	-0.194	-1.802	0.438	0.712	0.381	0.382	0.898	0.709	0.0935	-0.71	0.668	0.7105	1
YDR059C	UBC5	0.148019	0.937003	0.227	0.17	0.487	0.713	0.033	0.131	0.267	0.704	0.13	0.1505	0.377	0.7085	1
YIL116W	HIS5	2.30471	-0.847728	-0.455	-0.718	-0.683	-0.989	-0.27	0.775	2.059	2.397	-0.3625	0.0285	0.688	0.704	0
YKL120W	OAC1	0.245916	0.837704	0.121	0.305	0.229	0.505	0.15	0.196	0.498	0.901	0.1355	0.2505	0.3635	0.703	1
YDL206W	YDL206W	0.102295	0.94417	0.066	0.176	0.553	0.705	0.128	0.054	0.401	0.7	0.097	0.115	0.477	0.7025	1
YML059C	NTE1	0.431322	0.594813	-0.026	-0.279	0.18	0.791	0.151	0.257	0.807	0.611	0.0625	-0.011	0.4935	0.701	1
YMR020W	FMS1	0.14162	0.999894	-0.001	0.004	0.285	0.685	0.185	0.18	0.403	0.712	0.092	0.092	0.344	0.6985	1
YML060W	OGG1	0.433728	0.851276	0.136	-0.158	0.429	1.075	0.141	-0.046	0.015	0.321	0.1385	-0.102	0.222	0.698	1
YDL118W	YDL118W	1.11272	-0.76029	0.527	0.744	-1.003	0.465	0.246	0.403	1.128	0.93	0.3865	0.5735	0.0625	0.6975	1
YGL170C	SPO74	0.717666	0.757929	-0.112	0.443	0.765	1.12	-0.212	-0.229	-0.171	0.27	-0.162	0.107	0.297	0.695	1
YDL026W	YDL026W	0.13698	0.904463	0.044	0.316	0.359	0.765	0.118	0.096	0.332	0.622	0.081	0.206	0.3455	0.6935	1
YDR346C	SVF1	0.497254	0.799866	0.156	-0.632	0.415	1.06	0.162	-0.268	-0.15	0.327	0.159	-0.45	0.1325	0.6935	1
YOR028C	CIN5	1.21473	-0.858701	-0.201	-0.189	-0.371	-0.372	-0.281	0.136	0.758	1.753	-0.241	-0.0265	0.1935	0.6905	0
YKR094C	RPL40B	1.2007	0.178095	0.34	0.294	-1.682	-0.248	-0.041	-0.031	-0.269	1.628	0.1495	0.1315	-0.9755	0.69	0
YML087C	YML087C	0.120957	0.936795	0.2	0.036	0.41	0.725	0.185	0.03	0.179	0.655	0.1925	0.033	0.2945	0.69	1
YLR131C	ACE2	0.683438	0.434077	-0.219	0.027	-0.542	0.391	0.284	0.157	0.573	0.987	0.0325	0.092	0.0155	0.689	1
YOR238W	YOR238W	0.106401	0.920719	0.149	0.269	0.286	0.67	0.045	0.181	0.445	0.708	0.097	0.225	0.3655	0.689	1
YER079W	YER079W	0.148801	0.993294	0.12	0.257	0.36	0.556	0.173	0.324	0.47	0.819	0.1465	0.2905	0.415	0.6875	1
YNL211C	YNL211C	0.333617	0.697003	0.017	0.253	0.313	0.99	0.044	-0.005	0.371	0.378	0.0305	0.124	0.342	0.684	1
YML003W	YML003W	0.245562	0.977774	0.199	0.053	0.502	0.888	0.161	0.119	0.241	0.479	0.18	0.086	0.3715	0.6835	1
YGL078C	DBP3	1.66893	0.684239	1.029	0.763	1.996	1.237	-1.139	-0.611	0.173	0.128	-0.055	0.076	1.0845	0.6825	0
YMR181C	YMR181C	0.397967	0.955151	0.011	-0.85	0.508	0.872	0.086	-0.269	0.128	0.49	0.0485	-0.5595	0.318	0.681	1
YCR005C	CIT2	0.270277	0.68023	0.087	0.048	0.098	0.705	0.146	0.282	0.579	0.654	0.1165	0.165	0.3385	0.6795	1
YKL066W	YKL066W	0.119802	0.944002	-0.029	0.144	0.204	0.738	0.103	0.129	0.364	0.619	0.037	0.1365	0.284	0.6785	1
YGL101W	YGL101W	0.17862	0.812912	0.024	0.52	0.536	0.725	0.096	0.184	0.518	0.629	0.06	0.352	0.527	0.677	1
YLR173W	YLR173W	0.307284	0.533445	-0.076	0.396	0.104	0.57	0.026	0.085	0.579	0.782	-0.025	0.2405	0.3415	0.676	1
YIL060W	YIL060W	0.106647	0.9745	0.006	0.079	0.51	0.646	0.123	0.244	0.472	0.702	0.0645	0.1615	0.491	0.674	1
YLR134W	PDC5	0.139897	0.982272	-0.033	0.098	0.376	0.799	0.005	0.002	0.308	0.548	-0.014	0.05	0.342	0.6735	1
YOR166C	SWT1	0.252233	0.909744	0.051	0.191	0.658	0.795	-0.008	0.107	0.228	0.552	0.0215	0.149	0.443	0.6735	1
YFR056C	YFR056C	0.282795	0.417767	0.148	-0.003	0.458	0.585	0.207	0.248	-0.014	0.76	0.1775	0.1225	0.222	0.6725	1
YGR038W	ORM1	0.652043	-0.56539	0.137	0.25	0.381	0.038	-0.099	0.118	0.25	1.307	0.019	0.184	0.3155	0.6725	1
YKL157W	APE2	0.291167	0.931219	0.167	0.368	0.721	0.796	0.035	0.027	0.341	0.549	0.101	0.1975	0.531	0.6725	1
YFR034C	PHO4	0.533607	-0.348297	0.348	0.883	0.117	0.953	0.07	0.322	0.771	0.388	0.209	0.6025	0.444	0.6705	1
YMR041C	YMR041C	0.108182	0.952278	0.076	-0.039	0.344	0.711	0.13	-0.051	0.152	0.628	0.103	-0.045	0.248	0.6695	1
YDR127W	ARO1	0.6672	0.464972	-0.038	1.857	0.536	1.021	0.778	1.189	0.127	0.313	0.37	1.523	0.3315	0.667	1
YKL149C	DBR1	1.36625	-0.701272	0.167	-0.019	-0.633	-0.176	0.496	0.898	1.284	1.51	0.3315	0.4395	0.3255	0.667	0
YJR019C	TES1	0.535106	0.990433	0.113	0.101	0.396	1.108	-0.163	-0.214	-0.032	0.221	-0.025	-0.0565	0.182	0.6645	1
YCR089W	FIG2	0.181046	0.91665	0.147	0.35	0.293	0.612	-0.009	0.047	0.227	0.715	0.069	0.1985	0.26	0.6635	1
YDR183W	PLP1	0.234204	0.629518	-0.005	0.449	0.317	0.57	0.048	0.024	0.363	0.754	0.0215	0.2365	0.34	0.662	1
YJR117W	STE24	1.17859	0.928253	0.169	-0.27	0.551	1.5	-0.966	-0.9	-0.478	-0.177	-0.3985	-0.585	0.0365	0.6615	1
YKL051W	SFK1	0.087926	0.985912	0.185	0.206	0.481	0.663	0.022	0.143	0.5	0.658	0.1035	0.1745	0.4905	0.6605	1
YBR030W	YBR030W	0.277889	0.958277	0.101	0.225	0.306	0.934	0.119	0.159	0.253	0.385	0.11	0.192	0.2795	0.6595	1
YGL196W	YGL196W	0.27246	0.534804	0.139	0.266	0.297	0.768	0.095	-0.053	0.677	0.547	0.117	0.1065	0.487	0.6575	1
YLR206W	ENT2	0.179026	0.936678	0.024	0.181	0.619	0.658	-0.094	0.004	0.331	0.656	-0.035	0.0925	0.475	0.657	1
YNR021W	YNR021W	0.143865	0.868354	0.021	0.399	0.422	0.642	0.009	0.115	0.455	0.672	0.015	0.257	0.4385	0.657	1
YDL022W	GPD1	1.40502	0.014371	-0.136	0.214	1.706	0.947	-0.015	2.927	1.28	0.364	-0.0755	1.5705	1.493	0.6555	0
YGR226C	YGR226C	0.443345	0.919497	0.096	0.221	0.333	1.017	-0.033	-0.158	0.014	0.293	0.0315	0.0315	0.1735	0.655	1
YJR119C	JHD2	0.081977	0.994061	0.157	0.169	0.297	0.587	0.067	0.151	0.333	0.718	0.112	0.16	0.315	0.6525	1
YOR062C	YOR062C	0.118696	0.913971	0.077	0.17	0.534	0.752	0.049	0.121	0.647	0.551	0.063	0.1455	0.5905	0.6515	1
YBR262C	FMP51	0.100468	0.971899	0.122	0.203	0.426	0.712	0.123	0.06	0.355	0.59	0.1225	0.1315	0.3905	0.651	1
YJL088W	ARG3	0.135637	0.888834	0.193	0.105	0.329	0.763	0.13	0.218	0.405	0.537	0.1615	0.1615	0.367	0.65	1
YOL104C	NDJ1	0.492154	0.60745	-0.069	0.043	-0.479	0.239	-0.072	-0.009	0.066	1.057	-0.0705	0.017	-0.2065	0.648	1
YAR027W	UIP3	0.196646	0.949181	0.095	0.009	0.473	0.822	0.231	0.118	0.423	0.473	0.163	0.0635	0.448	0.6475	1
YDR374C	YDR374C	0.18653	0.818219	0.031	0.318	0.31	0.546	0.036	0.067	0.498	0.748	0.0335	0.1925	0.404	0.647	1
YPR200C	ARR2	0.223835	0.786243	0.229	0.031	0.576	0.458	0.132	0.249	0.636	0.832	0.1805	0.14	0.606	0.645	1
YDL194W	SNF3	0.72444	0.67295	0.242	0.146	0.099	1.289	-0.018	-0.251	-0.362	0	0.112	-0.0525	-0.1315	0.6445	1
YER007C-A	TMA20	0.590426	0.87344	0.36	0.64	1.134	1.06	-0.05	0.14	0.601	0.228	0.155	0.39	0.8675	0.644	1
YPL172C	COX10	0.23682	0.989004	-0.619	-0.133	-0.311	0.74	-0.852	-0.247	-0.656	0.545	-0.7355	-0.19	-0.4835	0.6425	1
YPR089W	YPR089W	0.110006	0.925213	0.044	0.199	0.436	0.724	0.154	0.105	0.466	0.561	0.099	0.152	0.451	0.6425	1
YCR061W	YCR061W	0.135841	0.986685	-0.306	0.064	0.031	0.675	-0.377	-0.155	-0.094	0.603	-0.3415	-0.0455	-0.0315	0.639	1
YDR066C	YDR066C	0.266493	0.993428	0.034	0.092	0.215	0.406	0.033	0.089	0.479	0.869	0.0335	0.0905	0.347	0.6375	1
YDL234C	GYP7	0.085667	0.956442	-0.022	0.185	0.438	0.643	0.141	0.141	0.463	0.628	0.0595	0.163	0.4505	0.6355	1
YFR039C	YFR039C	0.425541	0.343008	0.078	0.205	0.558	0.874	0.007	0.656	1.095	0.397	0.0425	0.4305	0.8265	0.6355	1
YOR193W	PEX27	0.119106	0.889328	0.114	0.14	0.519	0.528	0.148	0.146	0.416	0.74	0.131	0.143	0.4675	0.634	1
YER080W	FMP29	0.383748	0.963379	0.086	0.169	0.576	0.977	0.045	0.107	0.242	0.29	0.0655	0.138	0.409	0.6335	1
YKL086W	SRX1	0.167441	0.887205	0.239	0.15	0.349	0.508	0.029	0.208	0.39	0.759	0.134	0.179	0.3695	0.6335	1
YOR051C	YOR051C	1.56875	-0.605132	-0.113	1.041	0.746	0.267	-0.462	-1.334	-1.137	0.999	-0.2875	-0.1465	-0.1955	0.633	0
YML058W	SML1	0.134537	0.985069	0.13	0.077	0.386	0.744	0.19	0.142	0.266	0.52	0.16	0.1095	0.326	0.632	1
YNL339C	YRF1-6	0.211157	0.974911	0.1	0.039	0.383	0.477	0.135	0.213	0.611	0.785	0.1175	0.126	0.497	0.631	1
YPR068C	HOS1	0.090356	0.994883	0.101	0.137	0.467	0.682	0.019	0.022	0.419	0.58	0.06	0.0795	0.443	0.631	1
YOR363C	PIP2	0.124375	0.843982	0.071	0.316	0.294	0.677	0.103	0.115	0.4	0.581	0.087	0.2155	0.347	0.629	1
YDR541C	YDR541C	0.096163	0.9508	0.212	0.08	0.212	0.698	0.094	0.14	0.224	0.559	0.153	0.11	0.218	0.6285	1
YPL258C	THI21	0.07947	0.974308	0.145	-0.02	0.413	0.683	0.089	0.079	0.411	0.572	0.117	0.0295	0.412	0.6275	1
YPR077C	YPR077C	0.133091	0.926758	-0.041	0.168	0.253	0.731	0.047	0.032	0.295	0.524	0.003	0.1	0.274	0.6275	1
YDR061W	YDR061W	0.247837	0.575159	0.198	0.288	0.293	0.861	0.148	0.214	0.419	0.39	0.173	0.251	0.356	0.6255	1
YML034W	SRC1	0.218333	0.910955	0.063	0.257	0.4	0.802	0.005	0.016	0.332	0.449	0.034	0.1365	0.366	0.6255	1
YGL177W	YGL177W	0.401524	0.802029	-0.246	0.055	-0.172	0.266	-0.045	-0.045	0.109	0.984	-0.1455	0.005	-0.0315	0.625	1
YPR126C	YPR126C	0.451037	0.457316	-0.042	0.174	1.274	0.564	0.047	0.504	0.448	0.685	0.0025	0.339	0.861	0.6245	1
YAL046C	YAL046C	0.283324	0.615556	0.091	-0.117	0.193	0.782	0.158	0.172	0.558	0.466	0.1245	0.0275	0.3755	0.624	1
YNL194C	YNL194C	1.06924	-0.111228	-0.106	-0.747	-0.165	-0.265	-0.475	0.268	0.334	1.512	-0.2905	-0.2395	0.0845	0.6235	1
YLR365W	YLR365W	0.259371	0.58496	0.07	0.427	0.317	0.446	0.09	0.171	0.596	0.8	0.08	0.299	0.4565	0.623	1
YAL005C	SSA1	0.184915	0.90838	0.047	-0.286	0.589	0.593	0.123	-0.012	0.36	0.652	0.085	-0.149	0.4745	0.6225	1
YGL203C	KEX1	0.549545	-0.324899	0.136	0.457	0.233	0.194	0.274	0.305	0.895	1.047	0.205	0.381	0.564	0.6205	1
YMR316C-B	YMR316C-B	0.652699	0.686256	0.194	-0.413	0.888	1.098	0.154	-0.1	0.057	0.142	0.174	-0.2565	0.4725	0.62	1
YKR045C	YKR045C	0.132021	0.989342	0.039	0.084	0.079	0.547	0.212	0.177	0.181	0.691	0.1255	0.1305	0.13	0.619	1
YNR044W	AGA1	0.563698	0.694623	0.158	0.314	0.498	1.09	0.018	0.053	-0.046	0.148	0.088	0.1835	0.226	0.619	1
YPL119C	DBP1	0.349234	0.63208	0.256	0.358	0.309	0.403	0.083	0.371	0.833	0.831	0.1695	0.3645	0.571	0.617	1
YDR446W	ECM11	0.219886	0.708302	0.012	0.502	0.266	0.64	-0.083	0.093	0.388	0.593	-0.0355	0.2975	0.327	0.6165	1
YOR042W	CUE5	0.245575	0.968575	0.009	-0.045	0.33	0.418	0.116	0.147	0.52	0.814	0.0625	0.051	0.425	0.616	1
YGL059W	YGL059W	0.089489	0.996548	0.077	0.068	0.452	0.689	0.025	0.01	0.386	0.542	0.051	0.039	0.419	0.6155	1
YKR099W	BAS1	1.24497	-0.974129	-0.042	1.338	-0.026	1.443	0.416	-0.371	0.54	-0.215	0.187	0.4835	0.257	0.614	0
YOR076C	SKI7	0.410899	0.307177	-0.057	-0.28	0.5	0.405	0.253	0.221	0.105	0.82	0.098	-0.0295	0.3025	0.6125	1
YPR004C	YPR004C	0.426942	0.832739	-0.116	0.049	0.319	0.256	0.181	0.134	0.673	0.969	0.0325	0.0915	0.496	0.6125	1
YPR037C	ERV2	0.445671	0.405504	0.323	0.165	0.351	0.362	0.139	0.47	0.998	0.861	0.231	0.3175	0.6745	0.6115	1
YGL140C	YGL140C	0.484011	0.838914	0.083	0.129	0.266	0.203	0	0.326	0.746	1.016	0.0415	0.2275	0.506	0.6095	1
YKL181W	PRS1	0.387218	0.973761	-0.066	0.346	1.819	0.877	-0.217	-0.144	1.594	0.342	-0.1415	0.101	1.7065	0.6095	1
YLR287C	YLR287C	0.297292	0.887086	0.14	0.272	0.611	0.691	-0.03	-0.078	0.192	0.528	0.055	0.097	0.4015	0.6095	1
YOL052C	SPE2	0.518943	0.950403	0.168	0.179	0.604	0.993	-0.182	-0.049	0.046	0.224	-0.007	0.065	0.325	0.6085	1
YBR005W	RCR1	0.176389	0.92448	-0.014	-0.016	0.306	0.715	0.185	0.144	0.19	0.501	0.0855	0.064	0.248	0.608	1
YJL122W	ALB1	0.167172	0.930326	-0.05	0.117	0.275	0.704	0.183	0.181	0.399	0.509	0.0665	0.149	0.337	0.6065	1
YDR260C	SWM1	0.166586	0.883288	0.067	0.237	0.41	0.74	-0.043	0.083	0.468	0.472	0.012	0.16	0.439	0.606	1
YKL070W	YKL070W	0.098697	0.97099	0.072	0.185	0.364	0.577	-0.017	0.106	0.215	0.628	0.0275	0.1455	0.2895	0.6025	1
YPL260W	YPL260W	0.272988	0.379505	0.236	0.239	0.336	0.841	0.23	0.051	0.521	0.363	0.233	0.145	0.4285	0.602	1
YNL266W	YNL266W	0.22529	0.713955	0.035	0.353	0.074	0.646	-0.103	-0.04	0.221	0.557	-0.034	0.1565	0.1475	0.6015	1
YOR153W	PDR5	0.074703	0.917933	0.174	0.181	0.374	0.576	0.173	0.207	0.236	0.627	0.1735	0.194	0.305	0.6015	1
YBR007C	DSF2	0.123021	0.989458	-0.012	0.147	0.26	0.719	0.034	0.113	0.248	0.48	0.011	0.13	0.254	0.5995	1
YKL094W	YJU3	0.086035	0.953371	0.021	0.188	0.473	0.669	-0.001	0.118	0.541	0.529	0.01	0.153	0.507	0.599	1
YMR234W	RNH1	0.387885	0.222502	0.105	0.14	0.438	0.268	-0.034	0.017	0.075	0.928	0.0355	0.0785	0.2565	0.598	1
YER049W	TPA1	0.285413	0.891212	-0.061	0.247	0.218	0.809	-0.092	-0.117	0.102	0.386	-0.0765	0.065	0.16	0.5975	1
YKL071W	YKL071W	0.319657	0.978975	-0.093	0.17	0.686	0.845	0.061	0.199	0.317	0.347	-0.016	0.1845	0.5015	0.596	1
YDL110C	TMA17	0.460072	0.887618	-0.1	-0.317	0.001	0.281	-0.09	-0.059	0.625	0.906	-0.095	-0.188	0.313	0.5935	1
YNL099C	OCA1	0.580255	0.918767	-0.82	-0.181	0.607	1.07	-0.533	-0.533	0.131	0.114	-0.6765	-0.357	0.369	0.592	1
YGL165C	YGL165C	0.1322	0.982906	0.066	0.173	0.382	0.485	0.039	0.076	0.502	0.698	0.0525	0.1245	0.442	0.5915	1
YCR048W	ARE1	0.214775	0.782025	0.045	0.339	0.494	0.746	0.209	0.132	0.362	0.434	0.127	0.2355	0.428	0.59	1
YNL049C	SFB2	0.206115	0.97807	0.058	0.242	0.591	0.753	0.199	0.217	0.393	0.421	0.1285	0.2295	0.492	0.587	1
YNL096C	RPS7B	0.501311	0.923779	0.305	0.045	-0.105	1.047	0.016	-0.21	-0.197	0.126	0.1605	-0.0825	-0.151	0.5865	1
YOR083W	WHI5	1.62969	-0.857987	-0.604	-0.548	-0.697	-0.757	-0.659	0.117	1.023	1.93	-0.6315	-0.2155	0.163	0.5865	0
YER086W	ILV1	1.50964	0.141734	0.547	1.089	-2.227	1.645	0.772	0.287	-0.243	-0.473	0.6595	0.688	-1.235	0.586	0
YIL166C	YIL166C	0.154519	0.720032	0.284	0.311	0.616	0.714	0.172	0.366	0.736	0.458	0.228	0.3385	0.676	0.586	1
YGL162W	SUT1	0.176555	0.737995	-0.016	0.379	0.426	0.665	0.151	0.113	0.437	0.504	0.0675	0.246	0.4315	0.5845	1
YNL226W	YNL226W	2.16897	0.808682	1.606	2.109	1.329	1.808	0.036	0.412	-1.406	-0.64	0.821	1.2605	-0.0385	0.584	0
YKL178C	STE3	0.231782	0.941847	0.019	-0.175	0.115	0.532	0.154	0.128	0.422	0.635	0.0865	-0.0235	0.2685	0.5835	1
YML020W	YML020W	0.235845	0.704914	0.098	0.039	0.468	0.723	0.215	0.104	0.112	0.444	0.1565	0.0715	0.29	0.5835	1
YNR018W	YNR018W	0.265958	0.52791	0.327	0.675	0.681	0.392	0.132	0.486	0.931	0.775	0.2295	0.5805	0.806	0.5835	1
YPL216W	YPL216W	0.133167	0.899234	0.066	0.273	0.188	0.513	-0.019	0.075	0.256	0.654	0.0235	0.174	0.222	0.5835	1
YLR136C	TIS11	0.307927	0.994289	-0.235	-0.468	0.447	0.848	-0.291	-0.362	0.159	0.317	-0.263	-0.415	0.303	0.5825	1
YBR223C	TDP1	0.131367	0.984459	0.063	0.09	0.405	0.582	-0.105	-0.032	0.244	0.582	-0.021	0.029	0.3245	0.582	1
YKR009C	FOX2	0.090072	0.978386	0.076	0.213	0.545	0.665	0.133	0.228	0.512	0.498	0.1045	0.2205	0.5285	0.5815	1
YOR367W	SCP1	0.227586	0.554956	-0.009	0.359	0.224	0.685	0.037	0.069	0.502	0.476	0.014	0.214	0.363	0.5805	1
YDR090C	YDR090C	0.272271	0.705558	0.115	0.26	0.306	0.81	0.083	-0.028	0.3	0.349	0.099	0.116	0.303	0.5795	1
YGL197W	MDS3	0.251937	0.706576	0.377	0.588	1.051	0.333	0.477	0.624	1.028	0.825	0.427	0.606	1.0395	0.579	1
YKL187C	YKL187C	0.043569	0.99782	0.044	0.149	0.451	0.549	0.04	0.12	0.507	0.609	0.042	0.1345	0.479	0.579	1
YML084W	YML084W	0.086663	0.93689	0.113	0.149	0.238	0.626	0.194	0.151	0.359	0.532	0.1535	0.15	0.2985	0.579	1
YOR382W	FIT2	0.095589	0.903884	0.132	0.077	0.347	0.534	0.109	0.241	0.315	0.624	0.1205	0.159	0.331	0.579	1
YKL105C	YKL105C	0.239246	0.769661	0.01	0.134	0.381	0.344	0.102	0.157	0.381	0.813	0.056	0.1455	0.381	0.5785	1
YDR287W	YDR287W	0.540172	0.842077	0.199	0.244	0.794	0.895	-0.029	-0.129	0.038	0.259	0.085	0.0575	0.416	0.577	1
YBR048W	RPS11B	2.00937	-0.439931	1.98	1.698	0.332	1.914	-0.167	-0.334	-0.174	-0.761	0.9065	0.682	0.079	0.5765	0
YDL036C	PUS9	0.10452	0.907602	0.013	0.158	0.403	0.493	0.053	0.098	0.3	0.66	0.033	0.128	0.3515	0.5765	1
YDR344C	YDR344C	0.260512	0.663947	0.037	0.054	0.27	0.798	0.253	0.177	0.382	0.354	0.145	0.1155	0.326	0.576	1
YFR036W	CDC26	0.668907	0.720042	0.269	-1.059	0.97	0.862	0.365	0.131	0.78	0.289	0.317	-0.464	0.875	0.5755	1
YLR210W	CLB4	0.136663	0.878788	-0.015	0	0.325	0.499	0.148	0.125	0.228	0.651	0.0665	0.0625	0.2765	0.575	1
YCR106W	RDS1	0.21815	0.522892	0.154	0.087	0.498	0.45	0.137	0.107	0.14	0.698	0.1455	0.097	0.319	0.574	1
YOR285W	YOR285W	0.16203	0.849591	0.077	0.216	0.54	0.414	0.088	0.155	0.533	0.732	0.0825	0.1855	0.5365	0.573	1
YBR065C	ECM2	0.57146	-0.556008	0.012	0.258	0.145	1.118	0.296	0.419	0.06	0.026	0.154	0.3385	0.1025	0.572	1
YBR045C	GIP1	0.956675	-0.7203	0.078	0.041	0.056	-0.189	0.062	0.578	1.085	1.332	0.07	0.3095	0.5705	0.5715	1
YIL054W	YIL054W	0.089771	0.922443	0.08	0.136	0.493	0.56	0.096	0.125	0.316	0.583	0.088	0.1305	0.4045	0.5715	1
YMR264W	CUE1	0.156266	0.994898	-0.121	-0.153	0.317	0.472	-0.148	-0.168	0.556	0.671	-0.1345	-0.1605	0.4365	0.5715	1
YNR014W	YNR014W	0.096222	0.995045	0.009	0.106	0.297	0.642	0.128	0.153	0.269	0.501	0.0685	0.1295	0.283	0.5715	1
YMR009W	ADI1	0.280162	0.928003	0.184	-0.104	0.045	0.781	0.283	0.177	0.264	0.36	0.2335	0.0365	0.1545	0.5705	1
YMR274C	RCE1	0.297259	0.870962	-0.228	-0.286	0.186	0.558	-0.047	-0.029	0.69	0.583	-0.1375	-0.1575	0.438	0.5705	1
YBL104C	YBL104C	0.231636	0.839771	0.056	0.314	0.287	0.403	0.109	0.294	0.603	0.737	0.0825	0.304	0.445	0.57	1
YDL035C	GPR1	0.428394	0.029084	0.109	0.723	0.876	0.617	0.222	0.207	0.208	0.523	0.1655	0.465	0.542	0.57	1
YGR035C	YGR035C	0.460615	0.934702	0.164	0.221	0.844	0.868	0.055	0.033	0.176	0.272	0.1095	0.127	0.51	0.57	1
YGL230C	YGL230C	0.889048	0.622448	-0.002	0.176	0.48	1.242	-0.696	-0.714	0.204	-0.104	-0.349	-0.269	0.342	0.569	1
YDR051C	YDR051C	0.181776	0.713932	0.03	0.232	0.449	0.401	0.144	0.205	0.366	0.735	0.087	0.2185	0.4075	0.568	1
YCR010C	ADY2	0.34394	0.778993	0.04	0.009	0.44	0.792	0.008	-0.064	-0.075	0.343	0.024	-0.0275	0.1825	0.5675	1
YGL205W	POX1	0.218736	0.969831	0.391	0.274	0.341	0.619	0.099	0.041	0.139	0.514	0.245	0.1575	0.24	0.5665	1
YGR138C	TPO2	0.194384	0.893593	-0.007	0.221	0.248	0.454	-0.071	0.103	0.536	0.678	-0.039	0.162	0.392	0.566	1
YKL043W	PHD1	0.215636	0.728911	-0.053	-0.092	0.33	0.632	0.208	0.139	0.113	0.5	0.0775	0.0235	0.2215	0.566	1
YNL281W	HCH1	0.255944	0.797114	0.004	0.326	0.306	0.689	-0.029	-0.103	0.178	0.443	-0.0125	0.1115	0.242	0.566	1
YKL096W	CWP1	0.167648	0.971917	0.079	0.074	0.383	0.722	0.15	0.072	0.286	0.409	0.1145	0.073	0.3345	0.5655	1
YGR143W	SKN1	1.22315	-0.466737	0.094	-0.342	-0.906	-0.053	0.135	0.479	1.041	1.179	0.1145	0.0685	0.0675	0.563	0
YMR276W	DSK2	0.258344	0.908406	-0.403	-0.413	0.035	0.534	-0.38	-0.251	0.522	0.589	-0.3915	-0.332	0.2785	0.5615	1
YOL013C	HRD1	0.348469	0.614455	0.213	0.27	0.055	0.82	-0.127	-0.033	0.16	0.303	0.043	0.1185	0.1075	0.5615	1
YGL228W	SHE10	0.268604	0.579714	0.377	-0.087	0.066	0.676	0.265	0.255	-0.257	0.442	0.321	0.084	-0.0955	0.559	1
YPR075C	OPY2	0.388827	0.806144	0.28	0.405	0.418	0.781	0.064	-0.097	0.092	0.334	0.172	0.154	0.255	0.5575	1
YPL182C	YPL182C	0.223371	0.786864	0.117	0.395	0.347	0.555	-0.085	-0.003	0.366	0.558	0.016	0.196	0.3565	0.5565	1
YDR291W	HRQ1	0.206554	0.984853	0.026	0.083	0.366	0.73	0.041	0.046	0.147	0.382	0.0335	0.0645	0.2565	0.556	1
YER181C	YER181C	0.120426	0.985034	0.166	0.189	0.465	0.646	0.135	0.189	0.308	0.466	0.1505	0.189	0.3865	0.556	1
YOR273C	TPO4	0.068998	0.998047	0.093	0.193	0.448	0.617	0.088	0.176	0.388	0.494	0.0905	0.1845	0.418	0.5555	1
YBR096W	YBR096W	0.939117	0.269842	0.038	-0.278	0.612	-0.275	0.571	0.216	1.106	1.385	0.3045	-0.031	0.859	0.555	1
YMR095C	SNO1	0.316138	-0.058185	0.173	-0.006	0.29	0.81	0.181	0.366	0.325	0.3	0.177	0.18	0.3075	0.555	1
YLR281C	YLR281C	0.287772	0.772846	-0.026	-0.421	0.465	0.62	-0.018	0.03	0.134	0.485	-0.022	-0.1955	0.2995	0.5525	1
YIL165C	YIL165C	0.225975	0.647568	0.261	0.125	0.512	0.584	0.144	0.077	0.083	0.519	0.2025	0.101	0.2975	0.5515	1
YBR082C	UBC4	2.04619	-0.89812	1.384	1.282	1.504	2.072	0.147	-0.102	-0.508	-0.97	0.7655	0.59	0.498	0.551	0
YKR055W	RHO4	1.2349	-0.31914	-1.287	-0.296	0.288	-0.242	0.353	0.113	-0.565	1.344	-0.467	-0.0915	-0.1385	0.551	0
YLL010C	PSR1	0.523152	0.169415	0.082	-0.064	-0.412	0.278	-0.322	0.061	0.374	0.824	-0.12	-0.0015	-0.019	0.551	1
YPL001W	HAT1	0.163833	0.940045	0.057	0.166	0.365	0.636	0.035	0.032	0.12	0.466	0.046	0.099	0.2425	0.551	1
YGR100W	MDR1	0.549596	-0.376852	0.16	0.331	-0.013	0.174	-0.08	0.293	0.75	0.927	0.04	0.312	0.3685	0.5505	1
YAL045C	YAL045C	0.192403	0.993905	0.195	-0.001	0.282	0.72	0.228	0.174	0.273	0.379	0.2115	0.0865	0.2775	0.5495	1
YKR003W	OSH6	0.234293	0.931645	-0.19	-0.116	-0.066	0.432	-0.117	0.022	0.31	0.664	-0.1535	-0.047	0.122	0.548	1
YNL239W	LAP3	0.20986	0.985351	-0.101	0.05	0.163	0.39	0.045	0.14	0.381	0.705	-0.028	0.095	0.272	0.5475	1
YLR137W	YLR137W	0.19284	0.991645	-0.034	-0.032	0.668	0.678	0.07	0.002	0.409	0.414	0.018	-0.015	0.5385	0.546	1
YLR194C	YLR194C	0.208082	0.881696	0.052	0.242	0.102	0.414	-0.043	-0.024	-0.052	0.678	0.0045	0.109	0.025	0.546	1
YOR377W	ATF1	0.453109	0.687509	0.147	0.051	0.182	0.228	0.152	0.354	0.752	0.864	0.1495	0.2025	0.467	0.546	1
YER106W	MAM1	0.33001	0.493718	0.04	0.303	0.142	0.817	0.069	-0.06	0.212	0.271	0.0545	0.1215	0.177	0.544	1
YLR174W	IDP2	0.141263	0.97044	0.047	0.127	0.625	0.609	0.093	0.11	0.379	0.479	0.07	0.1185	0.502	0.544	1
YGL262W	YGL262W	0.035934	0.997387	0.07	0.069	0.403	0.568	0.112	0.099	0.413	0.519	0.091	0.084	0.408	0.5435	1
YOR352W	YOR352W	0.225519	0.40131	0.184	0.418	0.188	0.558	0.071	0.019	0.363	0.529	0.1275	0.2185	0.2755	0.5435	1
YIR029W	DAL2	0.329439	0.877325	0.094	0.083	0.162	0.797	-0.162	-0.236	0.08	0.287	-0.034	-0.0765	0.121	0.542	1
YNL014W	HEF3	0.136574	0.831732	0.074	0.322	0.234	0.602	0.13	0.087	0.191	0.482	0.102	0.2045	0.2125	0.542	1
YMR031C	YMR031C	0.2212	0.932025	0.116	0.052	0.2	0.409	0.321	0.313	0.326	0.673	0.2185	0.1825	0.263	0.541	1
YDR402C	DIT2	0.244084	0.699144	0.053	0.152	0.521	0.673	0.142	0.121	0.122	0.408	0.0975	0.1365	0.3215	0.5405	1
YDR121W	DPB4	0.808877	-0.608854	0.103	0.414	0.565	0.383	0.402	0.456	-0.993	0.697	0.2525	0.435	-0.214	0.54	1
YBR022W	POA1	0.440696	0.056455	0.061	0.071	-0.121	0.499	0.064	0.251	0.738	0.58	0.0625	0.161	0.3085	0.5395	1
YDR258C	HSP78	0.457164	0.314649	-0.085	-0.202	0.029	0.974	0.156	-0.159	0.161	0.103	0.0355	-0.1805	0.095	0.5385	1
YBR199W	KTR4	0.115445	0.894198	0.13	0.176	0.429	0.458	0.081	0.072	0.306	0.616	0.1055	0.124	0.3675	0.537	1
YML052W	SUR7	0.232585	0.694973	0.078	-0.066	0.143	0.68	0.188	0.159	0.41	0.393	0.133	0.0465	0.2765	0.5365	1
YFR045W	YFR045W	0.332335	0.953116	0.096	0.28	0.587	0.772	0.024	0.004	0.216	0.3	0.06	0.142	0.4015	0.536	1
YJL012C	VTC4	0.271882	0.7979	0.026	0.31	0.421	0.769	0.053	0.055	0.308	0.303	0.0395	0.1825	0.3645	0.536	1
YAR030C	YAR030C	0.269954	0.584694	0.196	-0.004	0.39	0.711	0.187	0.099	-0.007	0.36	0.1915	0.0475	0.1915	0.5355	1
YDR046C	BAP3	0.251813	0.679912	0.033	0.27	0.524	0.771	0.129	0.142	0.466	0.297	0.081	0.206	0.495	0.534	1
YLR303W	MET17	0.331667	0.971879	-0.042	0.163	0.385	0.761	-0.172	-0.167	0.059	0.305	-0.107	-0.002	0.222	0.533	1
YNL141W	AAH1	0.333574	0.817662	0.072	0.168	0.38	0.775	0.047	-0.045	-0.026	0.291	0.0595	0.0615	0.177	0.533	1
YHL036W	MUP3	2.31985	-0.449787	-0.327	-1.675	-0.58	-1.548	0.238	0.093	0.301	2.612	-0.0445	-0.791	-0.1395	0.532	0
YLR279W	YLR279W	0.18293	0.939255	0.132	0.057	0.392	0.678	0.031	-0.126	0.322	0.386	0.0815	-0.0345	0.357	0.532	1
YMR019W	STB4	0.22395	0.281058	0.179	0.082	0.573	0.411	0.295	0.233	0.247	0.652	0.237	0.1575	0.41	0.5315	1
YDL233W	YDL233W	0.269047	0.914226	0.04	0.027	0.078	0.334	0.059	0.134	0.428	0.728	0.0495	0.0805	0.253	0.531	1
YDR099W	BMH2	0.245343	0.816121	0.02	0.173	0.12	0.324	0.072	0.075	0.369	0.732	0.046	0.124	0.2445	0.528	1
YKR014C	YPT52	0.30522	0.501797	-0.027	-0.075	0.298	0.69	0.023	0.206	0.728	0.364	-0.002	0.0655	0.513	0.527	1
YFR057W	YFR057W	0.098238	0.885679	0.108	0.006	0.389	0.488	0.167	-0.01	0.218	0.563	0.1375	-0.002	0.3035	0.5255	1
YHR204W	MNL1	0.153755	0.674068	0.125	0.325	0.277	0.659	0.038	0.438	0.326	0.391	0.0815	0.3815	0.3015	0.525	1
YKL184W	SPE1	0.086409	0.952987	0.124	0.012	0.268	0.532	0.129	0.166	0.345	0.518	0.1265	0.089	0.3065	0.525	1
YAL031C	GIP4	0.307167	0.680553	0.221	-0.027	-0.142	0.812	0.231	0.172	-0.065	0.236	0.226	0.0725	-0.1035	0.524	1
YLR445W	YLR445W	0.713663	0.516728	0.074	0.381	0.291	1.126	-0.12	-0.216	-0.149	-0.078	-0.023	0.0825	0.071	0.524	1
YKL030W	YKL030W	0.118981	0.920307	0.104	0.192	0.423	0.42	0.043	0.097	0.385	0.626	0.0735	0.1445	0.404	0.523	1
YJR056C	YJR056C	0.131299	0.985758	0.187	0.211	0.319	0.618	0.112	0.148	0.169	0.426	0.1495	0.1795	0.244	0.522	1
YKL174C	TPO5	0.26247	0.521656	0.187	-0.043	0.449	0.413	-0.022	-0.025	0.019	0.629	0.0825	-0.034	0.234	0.521	1
YNL157W	IGO1	0.12968	0.905976	-0.083	0.187	0.343	0.5	-0.08	-0.05	0.246	0.541	-0.0815	0.0685	0.2945	0.5205	1
YPR184W	GDB1	0.136897	0.962079	-0.056	-0.045	0.114	0.494	0.045	0.075	0.333	0.543	-0.0055	0.015	0.2235	0.5185	1
YML054C	CYB2	0.623808	-0.60938	0.357	0.296	0.549	1.054	0.171	0.035	-0.001	-0.019	0.264	0.1655	0.274	0.5175	1
YJR146W	YJR146W	0.046024	0.995286	0.006	0.09	0.387	0.512	0.071	0.118	0.445	0.522	0.0385	0.104	0.416	0.517	1
YJL191W	RPS14B	0.420389	0.578371	0.006	0.4	0.227	0.779	-0.213	-0.217	0.204	0.252	-0.1035	0.0915	0.2155	0.5155	1
YOR175C	YOR175C	0.474172	-0.001587	0.116	0.474	0.435	0.969	-0.011	0.228	0.443	0.062	0.0525	0.351	0.439	0.5155	1
YNL072W	RNH201	0.712636	-0.695041	0.322	-0.045	-0.118	0.064	0.027	0.406	0.845	0.966	0.1745	0.1805	0.3635	0.515	1
YAL030W	SNC1	0.17988	0.942273	0.117	-0.05	0.14	0.636	0.246	0.134	0.281	0.393	0.1815	0.042	0.2105	0.5145	1
YDR504C	SPG3	0.260682	0.72291	-0.007	0.403	0.552	0.616	0.033	-0.034	0.358	0.412	0.013	0.1845	0.455	0.514	1
YBR042C	YBR042C	0.251343	0.838454	-0.009	0.422	0.171	0.631	-0.006	0.056	-0.081	0.396	-0.0075	0.239	0.045	0.5135	1
YKR074W	YKR074W	0.843257	-0.081498	-0.161	-0.265	-0.729	0.98	-0.693	-0.595	0.528	0.046	-0.427	-0.43	-0.1005	0.513	1
YFR038W	IRC5	0.176076	0.71848	0.023	0.3	0.394	0.684	0.055	0.297	0.467	0.341	0.039	0.2985	0.4305	0.5125	1
YKR012C	YKR012C	0.102706	0.810471	0.127	0.128	0.295	0.555	0.07	0.306	0.289	0.47	0.0985	0.217	0.292	0.5125	1
YDR104C	SPO71	0.155448	0.882559	0.089	0.198	0.532	0.572	0.089	0.158	0.248	0.452	0.089	0.178	0.39	0.512	1
YKL072W	STB6	0.140818	0.943178	-0.017	0.141	0.382	0.397	0.118	0.166	0.469	0.627	0.0505	0.1535	0.4255	0.512	1
YGR012W	YGR012W	0.242866	0.958977	0.149	0.325	0.294	0.627	-0.058	0.006	0.104	0.392	0.0455	0.1655	0.199	0.5095	1
YOR079C	ATX2	0.296057	0.686645	0.207	0.36	0.26	0.729	0.12	-0.008	0.138	0.29	0.1635	0.176	0.199	0.5095	1
YDR084C	TVP23	0.199013	0.910461	-0.059	0.272	0.497	0.6	-0.053	-0.02	0.297	0.418	-0.056	0.126	0.397	0.509	1
YOR185C	GSP2	0.145563	0.751365	0.096	0.083	0.272	0.451	0.135	0.092	0.008	0.567	0.1155	0.0875	0.14	0.509	1
YAL017W	PSK1	0.308058	-0.759533	0.345	0.207	0.332	0.797	0.423	0.399	0.271	0.22	0.384	0.303	0.3015	0.5085	1
YLR387C	REH1	0.117119	0.973653	0.116	0.179	0.651	0.543	0.072	0.112	0.442	0.474	0.094	0.1455	0.5465	0.5085	1
YDR411C	DFM1	0.106078	0.994005	-0.005	0.104	0.353	0.601	0.078	0.133	0.309	0.413	0.0365	0.1185	0.331	0.507	1
YDR094W	YDR094W	1.09801	0.755545	-0.042	-2.01	0.445	0.195	0.56	0.005	0.331	0.817	0.259	-1.0025	0.388	0.506	1
YDR318W	MCM21	0.325492	0.108693	0.09	0.539	-0.076	0.544	0.049	-0.01	0.263	0.468	0.0695	0.2645	0.0935	0.506	1
YIL131C	FKH1	0.082833	0.870568	0.144	0.218	0.408	0.513	0.144	0.236	0.244	0.498	0.144	0.227	0.326	0.5055	1
YGL009C	LEU1	0.1567	0.904605	0.042	0.213	0.384	0.642	0.167	0.152	0.327	0.367	0.1045	0.1825	0.3555	0.5045	1
YGR236C	SPG1	0.130754	0.771643	-0.031	0.141	0.379	0.431	0.088	0.106	0.201	0.577	0.0285	0.1235	0.29	0.504	1
YKL128C	PMU1	0.648144	0.337333	0.045	0.403	1.505	0.459	-0.019	0.038	0.266	0.548	0.013	0.2205	0.8855	0.5035	1
YBR108W	YBR108W	0.311214	0.969135	0.034	-0.082	0.015	0.282	0.227	0.116	0.355	0.724	0.1305	0.017	0.185	0.503	1
YBR218C	PYC2	0.124172	0.94419	-0.115	-0.099	0.17	0.619	-0.164	-0.134	0.235	0.387	-0.1395	-0.1165	0.2025	0.503	1
YKL130C	SHE2	0.062646	0.965761	0.11	0.114	0.31	0.556	0.092	0.177	0.323	0.45	0.101	0.1455	0.3165	0.503	1
YGL131C	SNT2	0.250969	0.502849	0.118	0.177	0.403	0.253	0.159	0.218	0.427	0.751	0.1385	0.1975	0.415	0.502	1
YDL240W	LRG1	0.690526	-0.566872	0.159	0.237	0.379	1.088	0.326	0.608	-0.22	-0.088	0.2425	0.4225	0.0795	0.5	1
YPR179C	HDA3	0.500203	-0.821419	0.148	0.11	0.651	0.888	0.228	0.45	0.128	0.11	0.188	0.28	0.3895	0.499	1
YER119C	AVT6	0.146571	0.920935	0.026	0.105	0.165	0.418	0.068	0.103	0.407	0.578	0.047	0.104	0.286	0.498	1
YFL030W	AGX1	0.094982	0.969427	0.021	0.096	0.454	0.531	0.026	0.037	0.286	0.465	0.0235	0.0665	0.37	0.498	1
YDR184C	ATC1	0.418797	-0.159593	0.372	0.742	0.547	0.834	0.176	0.285	0.51	0.161	0.274	0.5135	0.5285	0.4975	1
YGL110C	CUE3	0.135133	0.8216	0.11	0.29	0.27	0.469	-0.004	0.154	0.466	0.525	0.053	0.222	0.368	0.497	1
YDL237W	YDL237W	0.135383	0.87284	-0.002	0.258	0.279	0.418	0.038	0.157	0.471	0.575	0.018	0.2075	0.375	0.4965	1
YDR152W	GIR2	0.436064	-0.047029	0.003	0.029	0.251	0.922	0.028	0.093	0.429	0.071	0.0155	0.061	0.34	0.4965	1
YDR119W	YDR119W	0.042805	0.9988	0.11	0.122	0.179	0.462	0.124	0.144	0.224	0.53	0.117	0.133	0.2015	0.496	1
YDR297W	SUR2	1.54134	-0.101735	0.075	-1.18	-0.608	-0.251	0.593	0.797	1.151	1.243	0.334	-0.1915	0.2715	0.496	0
YPR146C	YPR146C	0.133169	0.641873	0.116	0.462	0.521	0.408	0.166	0.284	0.445	0.584	0.141	0.373	0.483	0.496	1
YLR018C	POM34	0.7703	-0.5554	0.37	-0.506	0.314	0.991	-0.048	0.366	-0.36	-0.001	0.161	-0.07	-0.023	0.495	1
YKL076C	PSY1	0.14369	0.630818	0.426	0.374	0.255	0.513	0.163	0.269	0.223	0.476	0.2945	0.3215	0.239	0.4945	1
YMR012W	CLU1	0.273388	0.780942	0.116	0.032	-0.111	0.362	0.234	0.228	0.309	0.627	0.175	0.13	0.099	0.4945	1
YKL079W	SMY1	0.586457	0.866321	-0.584	-0.416	-0.326	0.366	0.224	0.048	0.34	0.619	-0.18	-0.184	0.007	0.4925	1
YBL028C	YBL028C	0.522072	0.986585	-0.02	0.146	0.248	0.832	-0.369	-0.354	-0.258	0.152	-0.1945	-0.104	-0.005	0.492	1
YGR177C	ATF2	0.079701	0.997407	0.13	0.195	0.232	0.553	0.088	0.12	0.176	0.431	0.109	0.1575	0.204	0.492	1
YNL298W	CLA4	1.47185	-0.791118	0.043	2.165	-0.178	1.12	-0.242	-0.477	-0.084	-0.143	-0.0995	0.844	-0.131	0.4885	0
YOL032W	OPI10	1.63003	-0.820667	0.529	0.994	1.325	1.606	-0.171	-0.099	-0.662	-0.629	0.179	0.4475	0.3315	0.4885	0
YBR201W	DER1	0.181454	0.797818	-0.084	0.311	0.272	0.473	-0.105	-0.031	0.156	0.502	-0.0945	0.14	0.214	0.4875	1
YBR206W	YBR206W	0.187207	0.819724	0.081	0.183	0.338	0.306	0.059	0.105	0.381	0.669	0.07	0.144	0.3595	0.4875	1
YGR031W	YGR031W	0.269233	0.727775	0.219	0.232	0.5	0.476	-0.037	-0.03	0.106	0.499	0.091	0.101	0.303	0.4875	1
YNL164C	IBD2	0.366239	0.752409	0.069	0.078	0.383	0.823	0.052	-0.085	0.142	0.151	0.0605	-0.0035	0.2625	0.487	1
YBR036C	CSG2	1.11714	-0.759901	-0.125	0.061	-0.384	-0.336	0.208	0.501	1.026	1.307	0.0415	0.281	0.321	0.4855	1
YDR457W	TOM1	0.88881	-0.892545	0.496	0.496	-0.393	1.247	0.049	0.3	0.383	-0.276	0.2725	0.398	-0.005	0.4855	1
YER101C	AST2	0.199163	0.952395	0.221	0.254	0.348	0.657	0.179	0.165	0.171	0.314	0.2	0.2095	0.2595	0.4855	1
YHR178W	STB5	0.721741	0.688777	0.265	0.964	-0.457	0.813	-0.16	-0.25	-0.471	0.158	0.0525	0.357	-0.464	0.4855	1
YPL229W	YPL229W	0.369355	0.442073	0.093	0.119	0.412	0.84	0.073	0.088	0.215	0.129	0.083	0.1035	0.3135	0.4845	1
YDL006W	PTC1	3.0052	-0.647223	0.893	2.492	0.348	2.98	-0.789	-0.346	-0.21	-2.013	0.052	1.073	0.069	0.4835	0
YIL099W	SGA1	0.505117	0.78589	0.084	0.24	0.404	0.818	-0.097	-0.205	-0.181	0.149	-0.0065	0.0175	0.1115	0.4835	1
YGL160W	YGL160W	0.360527	0.909505	-0.028	0.138	0.215	0.228	0.076	0.227	0.706	0.738	0.024	0.1825	0.4605	0.483	1
YGR069W	YGR069W	0.631573	0.011641	0.049	-0.856	0.373	0.388	0.325	0.133	-0.338	0.577	0.187	-0.3615	0.0175	0.4825	1
YKL117W	SBA1	0.299972	0.832351	0.043	0.04	0.06	0.269	0.025	0.14	0.469	0.696	0.034	0.09	0.2645	0.4825	1
YPR141C	KAR3	0.662644	0.826348	0.297	0.358	0.124	0.934	-0.314	-0.317	-0.208	0.03	-0.0085	0.0205	-0.042	0.482	1
YNR002C	ATO2	0.185843	0.696278	0.109	0.132	0.355	0.51	0.071	0.076	-0.006	0.453	0.09	0.104	0.1745	0.4815	1
YIL001W	YIL001W	0.326081	0.490423	0.055	0.307	0.369	0.779	0.076	0.064	0.266	0.183	0.0655	0.1855	0.3175	0.481	1
YKL115C	YKL115C	0.885239	0.191341	0.091	0.289	2.103	0.416	0.159	0.252	0.339	0.546	0.125	0.2705	1.221	0.481	1
YDL048C	STP4	0.208812	0.469344	0.145	0.218	0.025	0.372	0.081	0.161	0.372	0.588	0.113	0.1895	0.1985	0.48	1
YFL026W	STE2	0.434235	0.268057	-0.286	-0.075	0.112	0.513	0.097	0.07	-0.651	0.447	-0.0945	-0.0025	-0.2695	0.48	1
YIL162W	SUC2	0.563732	0.154325	0.138	0.206	0.625	0.912	0.108	-0.13	-0.016	0.048	0.123	0.038	0.3045	0.48	1
YLR344W	RPL26A	0.270551	0.376953	0.169	0.279	0.548	0.454	0.003	0.143	0.054	0.506	0.086	0.211	0.301	0.48	1
YCR102C	YCR102C	0.321824	0.86824	0.206	-0.086	0.237	0.548	-0.175	-0.263	-0.231	0.411	0.0155	-0.1745	0.003	0.4795	1
YER011W	TIR1	0.364349	-0.154754	0.03	0.12	0.03	0.826	0.108	0.087	0.232	0.131	0.069	0.1035	0.131	0.4785	1
YPL184C	MRN1	0.490571	-0.622238	0.349	0.623	0.019	0.215	0.011	0.305	0.705	0.741	0.18	0.464	0.362	0.478	1
YGR027C	RPS25A	0.60279	0.77905	-0.439	-0.019	0.338	0.005	0.037	0.295	0.823	0.95	-0.201	0.138	0.5805	0.4775	1
YGR225W	AMA1	0.250647	0.640242	-0.004	0.312	0.219	0.7	0.125	0.122	0.242	0.255	0.0605	0.217	0.2305	0.4775	1
YML058C-A	YML057C-A	0.230021	0.801279	0.022	-0.166	0.215	0.677	0.105	0.024	0.308	0.277	0.0635	-0.071	0.2615	0.477	1
YER072W	VTC1	0.089921	0.968074	0.136	0.182	0.4	0.495	0.066	0.107	0.257	0.458	0.101	0.1445	0.3285	0.4765	1
YGL255W	ZRT1	0.105916	0.960342	-0.005	0.156	0.659	0.399	0.124	0.21	0.619	0.553	0.0595	0.183	0.639	0.476	1
YCR049C	YCR049C	0.11512	0.966528	0.209	0.283	0.498	0.569	0.14	0.215	0.407	0.381	0.1745	0.249	0.4525	0.475	1
YDL122W	UBP1	0.607498	0.014951	-0.057	-0.086	0.658	0.991	0.127	0.414	1.009	-0.043	0.035	0.164	0.8335	0.474	1
YIL158W	YIL158W	0.111304	0.735743	0.131	0.11	0.35	0.499	0.193	0.273	0.221	0.449	0.162	0.1915	0.2855	0.474	1
YLR416C	YLR416C	0.285559	0.602228	0.009	0.09	0.114	0.753	0.092	0.089	0.203	0.195	0.0505	0.0895	0.1585	0.474	1
YER144C	UBP5	0.550677	-0.139305	0.124	0.548	0.479	0.951	0.067	0.312	-0.011	-0.005	0.0955	0.43	0.234	0.473	1
YNL165W	YNL165W	0.466246	0.934332	0.011	0.207	0.291	0.788	-0.266	-0.299	-0.083	0.158	-0.1275	-0.046	0.104	0.473	1
YKL188C	PXA2	0.472815	0.51673	0.06	0.319	0.309	0.722	-0.044	-0.405	-0.023	0.223	0.008	-0.043	0.143	0.4725	1
YOR019W	YOR019W	0.266503	0.817028	0.048	0.368	0.185	0.6	-0.25	0.009	0.166	0.343	-0.101	0.1885	0.1755	0.4715	1
YDR192C	NUP42	0.257925	0.453246	-0.052	0.197	0.5	0.35	-0.012	-0.04	0.113	0.592	-0.032	0.0785	0.3065	0.471	1
YGR077C	PEX8	0.584127	0.305443	0.145	-0.058	-0.02	0.078	-0.337	-0.744	0.19	0.864	-0.096	-0.401	0.085	0.471	1
YKR102W	FLO10	0.17395	0.62329	0.054	0.061	0.276	0.446	0.081	0.109	-0.064	0.495	0.0675	0.085	0.106	0.4705	1
YBR156C	SLI15	0.24426	0.302374	0.072	0.397	0.315	0.264	0.103	0.192	0.476	0.676	0.0875	0.2945	0.3955	0.47	1
YNL338W	YNL338W	0.369835	0.954058	0.079	0.417	0.902	0.676	-0.053	0.007	0.464	0.264	0.013	0.212	0.683	0.47	1
YHR035W	YHR035W	0.261481	0.969394	0.008	0.149	0.387	0.673	-0.038	-0.054	0.133	0.266	-0.015	0.0475	0.26	0.4695	1
YHL010C	YHL010C	0.280431	0.918135	0.096	0.148	0.109	0.741	0.025	0.098	0.009	0.196	0.0605	0.123	0.059	0.4685	1
YOR223W	YOR223W	0.148187	0.996325	0.111	0.11	0.132	0.32	0.105	0.118	0.121	0.616	0.108	0.114	0.1265	0.468	1
YDL114W	YDL114W	0.148417	0.922519	0.143	-0.305	0.203	0.528	0.058	-0.143	0.003	0.407	0.1005	-0.224	0.103	0.4675	1
YDR193W	YDR193W	0.262506	0.785257	-0.029	0.502	0.53	0.546	-0.067	0.054	0.309	0.389	-0.048	0.278	0.4195	0.4675	1
YGL115W	SNF4	1.67638	0.27705	1.085	0.46	0.371	0.965	-1.269	-1.316	-0.873	-0.034	-0.092	-0.428	-0.251	0.4655	0
YGR153W	YGR153W	0.25438	0.280867	0.516	0.227	0.474	0.49	0.04	0.132	0.33	0.44	0.278	0.1795	0.402	0.465	1
YPL256C	CLN2	0.678355	-0.401424	0.438	-0.081	-0.744	0.786	0.236	-0.084	0.434	0.144	0.337	-0.0825	-0.155	0.465	1
YHR057C	CPR2	0.435796	-0.672769	-0.142	0.315	0.042	0.859	0.169	0.117	0.077	0.07	0.0135	0.216	0.0595	0.4645	1
YKL033W-A	YKL033W-A	0.296411	0.363481	0.004	0.045	0.218	0.75	0.146	-0.002	0.273	0.179	0.075	0.0215	0.2455	0.4645	1
YMR008C	PLB1	0.409436	-0.210823	0.061	0.024	0.46	0.856	0.223	0.099	0.305	0.072	0.142	0.0615	0.3825	0.464	1
YIL089W	YIL089W	0.054986	0.966351	0	0.15	0.263	0.496	0.05	0.079	0.271	0.429	0.025	0.1145	0.267	0.4625	1
YOR284W	HUA2	0.241443	0.714905	0.211	0.427	0.494	0.62	0.044	0.103	0.461	0.305	0.1275	0.265	0.4775	0.4625	1
YPL181W	CTI6	0.167794	0.898375	-0.032	-0.067	0.361	0.534	0.085	0.213	0.37	0.391	0.0265	0.073	0.3655	0.4625	1
YGL260W	YGL260W	0.317101	0.217583	0.127	0.046	0.278	0.147	0.111	0.117	0.282	0.777	0.119	0.0815	0.28	0.462	1
YKL179C	COY1	0.118344	0.981718	0.034	0.137	0.36	0.36	0.051	0.207	0.456	0.564	0.0425	0.172	0.408	0.462	1
YLR207W	HRD3	0.535879	0.198498	0.175	0.306	0.673	0.889	-0.039	0.129	0.088	0.035	0.068	0.2175	0.3805	0.462	1
YJL020C	BBC1	0.120664	0.761356	0.132	0.327	0.233	0.511	0.149	0.109	0.218	0.41	0.1405	0.218	0.2255	0.4605	1
YKL025C	PAN3	0.393265	0.952299	0.225	0.145	-0.003	0.832	0.002	0.02	-0.038	0.089	0.1135	0.0825	-0.0205	0.4605	1
YLL016W	SDC25	0.511578	0.804321	0.208	0.248	0.213	0.574	-0.016	-0.32	-0.576	0.347	0.096	-0.036	-0.1815	0.4605	1
YLR376C	PSY3	0.508182	-0.237334	0.082	0.09	-0.199	0.284	0.018	0.26	0.737	0.636	0.05	0.175	0.269	0.46	1
YNL328C	MDJ2	0.401735	0.530991	0.063	0.376	0.577	0.64	0.023	-0.099	0.041	0.278	0.043	0.1385	0.309	0.459	1
YPL273W	SAM4	0.067467	0.924101	0.096	0.305	0.38	0.436	0.081	0.184	0.345	0.482	0.0885	0.2445	0.3625	0.459	1
YLR081W	GAL2	0.205043	0.551348	0.092	0.236	0.521	0.277	0.048	0.085	0.413	0.64	0.07	0.1605	0.467	0.4585	1
YLR325C	RPL38	0.121192	0.976536	0.211	0.332	-0.088	0.494	0.232	0.317	0.142	0.422	0.2215	0.3245	0.027	0.458	1
YAR042W	SWH1	0.372224	0.798906	-0.023	-0.483	0.043	0.373	0.11	0.145	0.38	0.542	0.0435	-0.169	0.2115	0.4575	1
YBR165W	UBS1	0.088538	0.948326	-0.01	0.13	0.276	0.402	0.124	0.16	0.296	0.512	0.057	0.145	0.286	0.457	1
YER004W	FMP52	0.157498	0.906148	0.114	0.106	0.145	0.603	0.206	0.135	0.204	0.309	0.16	0.1205	0.1745	0.456	1
YGR176W	YGR176W	0.065269	0.970841	0.135	0.117	0.382	0.477	0.017	0.091	0.4	0.431	0.076	0.104	0.391	0.454	1
YOR167C	RPS28A	1.48798	-0.644032	0.105	0.318	0.928	1.61	-0.582	-0.308	-0.699	-0.702	-0.2385	0.005	0.1145	0.454	0
YOR252W	TMA16	0.252092	0.424828	0.185	0.09	0.702	0.418	-0.073	0.323	0.344	0.49	0.056	0.2065	0.523	0.454	1
YLR328W	NMA1	0.473609	0.585689	-0.044	0.265	0.522	0.739	-0.05	-0.322	0.046	0.168	-0.047	-0.0285	0.284	0.4535	1
YMR173W	DDR48	0.078553	0.922104	0.014	0.138	0.214	0.503	0.048	0.029	0.252	0.402	0.031	0.0835	0.233	0.4525	1
YDR075W	PPH3	0.335374	0.400362	-0.046	0.306	0.129	0.212	-0.001	0.18	0.578	0.692	-0.0235	0.243	0.3535	0.452	1
YJL160C	YJL160C	0.231366	0.931641	0.098	0.038	0.396	0.522	-0.057	-0.202	0.06	0.382	0.0205	-0.082	0.228	0.452	1
YOL016C	CMK2	0.24901	0.969284	0.169	0.118	0.45	0.648	0.049	-0.024	0.212	0.252	0.109	0.047	0.331	0.45	1
YHR034C	PIH1	0.519152	0.722002	0.147	1.389	0.644	0.694	-0.015	0.492	0.554	0.205	0.066	0.9405	0.599	0.4495	1
YNL295W	YNL295W	0.68359	0.579481	0.137	0.846	-0.058	0.933	0.09	0.027	-0.569	-0.034	0.1135	0.4365	-0.3135	0.4495	1
YFL010W-A	AUA1	0.162435	0.72556	0.055	0.25	0.451	0.51	0.156	0.089	0.218	0.387	0.1055	0.1695	0.3345	0.4485	1
YNR009W	NRM1	0.103868	0.816706	0.052	0.046	0.372	0.383	0.065	0.108	0.222	0.512	0.0585	0.077	0.297	0.4475	1
YOR296W	YOR296W	0.215505	0.920086	0.068	0.064	0.245	0.329	0.06	0.243	0.558	0.565	0.064	0.1535	0.4015	0.447	1
YCL026C-A	FRM2	0.138385	0.84903	0.055	0.02	0.453	0.476	0.121	0.262	0.352	0.417	0.088	0.141	0.4025	0.4465	1
YNL191W	DUG3	0.975528	0.11332	0.907	-0.23	-1.053	-0.349	0.094	0.112	-0.341	1.239	0.5005	-0.059	-0.697	0.445	1
YAL022C	FUN26	0.334814	0.214472	0.058	-0.094	0.382	0.729	0.219	0.07	0.114	0.16	0.1385	-0.012	0.248	0.4445	1
YER187W	YER187W	0.201701	0.630393	0.025	-0.035	0.394	0.291	0.173	0.147	0.278	0.598	0.099	0.056	0.336	0.4445	1
YJL130C	URA2	0.295563	0.597309	-0.029	0.269	0.35	0.424	-0.11	-0.149	-0.058	0.465	-0.0695	0.06	0.146	0.4445	1
YKL064W	MNR2	0.288836	0.920961	0.109	0.088	0.18	0.19	0.15	0.174	0.438	0.698	0.1295	0.131	0.309	0.444	1
YPR152C	URN1	0.182455	0.811798	-0.056	-0.064	0.076	0.419	-0.022	-0.054	0.436	0.467	-0.039	-0.059	0.256	0.443	1
YBR204C	YBR204C	0.192721	0.892329	0.005	0.276	0.204	0.622	-0.025	0.14	0.187	0.263	-0.01	0.208	0.1955	0.4425	1
YOR328W	PDR10	0.088619	0.91558	0.003	0.039	0.251	0.481	0.109	0.057	0.133	0.404	0.056	0.048	0.192	0.4425	1
YLR407W	YLR407W	0.38278	0.659109	-0.051	-0.378	-0.478	0.715	-0.118	-0.251	0.038	0.168	-0.0845	-0.3145	-0.22	0.4415	1
YLR438W	CAR2	0.215108	0.957807	0.098	0.172	0.297	0.561	-0.017	-0.07	0.061	0.321	0.0405	0.051	0.179	0.441	1
YOR165W	SEY1	0.504993	-0.499299	0.23	0.171	0.232	0.059	-0.056	0.356	0.798	0.823	0.087	0.2635	0.515	0.441	1
YLR122C	YLR122C	0.287603	0.191819	0.138	0.139	-0.119	0.667	0.163	0.012	0.211	0.214	0.1505	0.0755	0.046	0.4405	1
YGL063W	PUS2	0.106719	0.937574	-0.015	0.115	0.192	0.354	0.061	0.059	0.28	0.524	0.023	0.087	0.236	0.439	1
YKR017C	YKR017C	0.248806	0.791554	-0.042	0.313	0.484	0.625	0.087	0.085	0.292	0.248	0.0225	0.199	0.388	0.4365	1
YOR383C	FIT3	0.087039	0.814768	0.113	0.243	0.476	0.383	0.11	0.209	0.343	0.49	0.1115	0.226	0.4095	0.4365	1
YDR057W	YOS9	0.484034	0.481593	-0.041	-0.666	0.648	0.326	0.113	0.188	0.279	0.545	0.036	-0.239	0.4635	0.4355	1
YDL130W	RPP1B	1.2408	-0.25958	1.192	0.69	-0.387	0.365	-0.742	-0.851	-0.541	0.505	0.225	-0.0805	-0.464	0.435	0
YMR174C	PAI3	0.041991	0.99211	-0.011	0.072	-0.177	0.461	0.008	0.01	-0.165	0.409	-0.0015	0.041	-0.171	0.435	1
YGL166W	CUP2	0.162661	0.617619	0.037	0.223	0.371	0.29	0.03	0.14	0.247	0.579	0.0335	0.1815	0.309	0.4345	1
YJR110W	YMR1	0.198752	0.850268	0.065	0.344	0.27	0.417	-0.117	0.059	0.064	0.452	-0.026	0.2015	0.167	0.4345	1
YGR018C	YGR018C	0.89153	-0.69334	-0.062	-0.081	-0.346	-0.144	0.146	0.393	0.909	1.012	0.042	0.156	0.2815	0.434	1
YDR210W	YDR210W	0.194254	0.750535	0.005	-0.029	-0.044	0.581	0.104	-0.012	0.188	0.286	0.0545	-0.0205	0.072	0.4335	1
YLR211C	YLR211C	0.233878	0.772533	-0.089	0.279	0.222	0.237	0.072	0.475	0.225	0.63	-0.0085	0.377	0.2235	0.4335	1
YPR058W	YMC1	0.128142	0.919223	-0.113	0.116	0.361	0.552	-0.017	0.102	0.371	0.315	-0.065	0.109	0.366	0.4335	1
YIL085C	KTR7	0.153939	0.880084	0.044	0.148	0.558	0.563	0.163	0.126	0.446	0.303	0.1035	0.137	0.502	0.433	1
YBR296C	PHO89	0.352766	0.829593	-0.021	-0.119	0.002	0.785	-0.043	-0.116	0.018	0.08	-0.032	-0.1175	0.01	0.4325	1
YLR454W	FMP27	0.235184	0.140841	0.221	0.232	0.638	0.401	0.126	0.211	0.182	0.463	0.1735	0.2215	0.41	0.432	1
YBR264C	YPT10	0.23227	0.292239	0.084	0.421	0.283	0.565	0.122	0.044	0.303	0.297	0.103	0.2325	0.293	0.431	1
YDR009W	GAL3	0.056265	0.997897	0.032	0.141	0.418	0.477	0.055	0.152	0.36	0.384	0.0435	0.1465	0.389	0.4305	1
YGL164C	YRB30	0.345998	0.822408	0.123	0.369	0.508	0.603	-0.028	-0.044	0.1	0.258	0.0475	0.1625	0.304	0.4305	1
YLR380W	CSR1	0.128262	0.714968	0.019	0.103	0.429	0.377	0.065	0.119	0.201	0.484	0.042	0.111	0.315	0.4305	1
YLR385C	SWC7	0.315333	0.643744	0.501	-0.287	0.406	0.468	-0.032	-0.155	0.105	0.393	0.2345	-0.221	0.2555	0.4305	1
YBR161W	CSH1	0.123833	0.882625	0	0.126	0.23	0.391	-0.019	-0.032	0.057	0.469	-0.0095	0.047	0.1435	0.43	1
YKR087C	OMA1	0.207092	0.763766	0.243	-0.116	0.252	0.6	0.025	-0.026	0.27	0.26	0.134	-0.071	0.261	0.43	1
YGR244C	LSC2	0.107034	0.932946	-0.118	-0.222	0.212	0.44	-0.156	-0.014	0.238	0.419	-0.137	-0.118	0.225	0.4295	1
YML083C	YML083C	0.31172	0.428228	0.124	-0.073	0.39	0.71	0.201	0.051	0.163	0.148	0.1625	-0.011	0.2765	0.429	1
YDR453C	TSA2	0.288812	0.489614	0.025	0.507	0.387	0.582	0.035	0.029	0.283	0.275	0.03	0.268	0.335	0.4285	1
YOL015W	IRC10	0.234824	0.466207	0.035	0.397	0.176	0.543	0.023	-0.011	0.215	0.314	0.029	0.193	0.1955	0.4285	1
YBL107C	YBL107C	0.249691	0.774448	0.038	-0.159	0.137	0.65	0.127	-0.021	-0.022	0.206	0.0825	-0.09	0.0575	0.428	1
YJR100C	YJR100C	0.322641	0.583548	-0.095	-0.175	0.599	0.546	0.056	0.001	0.045	0.31	-0.0195	-0.087	0.322	0.428	1
YPR167C	MET16	0.152496	0.992182	-0.236	-0.033	0.31	0.327	-0.091	0.054	0.465	0.528	-0.1635	0.0105	0.3875	0.4275	1
YNL314W	DAL82	0.178269	0.654664	0.191	0.311	0.468	0.36	-0.011	0.145	0.266	0.494	0.09	0.228	0.367	0.427	1
YKL185W	ASH1	0.314412	0.928287	-0.095	-0.058	0.38	0.176	0.032	0.133	0.683	0.677	-0.0315	0.0375	0.5315	0.4265	1
YNR022C	MRPL50	0.182108	0.861124	0.017	-0.004	0.217	0.606	0.021	0.057	0.223	0.247	0.019	0.0265	0.22	0.4265	1
YBR222C	PCS60	0.180501	0.831463	0.017	0.353	0.473	0.476	0.018	0.084	0.254	0.376	0.0175	0.2185	0.3635	0.426	1
YCR099C	YCR099C	0.239131	0.800848	-0.147	-0.112	0.278	0.588	-0.005	-0.037	-0.035	0.264	-0.076	-0.0745	0.1215	0.426	1
YDR209C	YDR209C	0.318949	0.675907	0.084	0.368	0.183	0.541	-0.125	-0.165	0.021	0.311	-0.0205	0.1015	0.102	0.426	1
YKR064W	OAF3	0.333257	0.8324	0.079	-0.48	0.481	0.485	0.218	0.106	0.221	0.367	0.1485	-0.187	0.351	0.426	1
YAL037W	YAL037W	0.383292	0.01378	0.181	0.046	0.418	0.712	0.221	0.026	-0.087	0.137	0.201	0.036	0.1655	0.4245	1
YLR453C	RIF2	0.11865	0.956353	0.138	0.222	0.327	0.529	0.075	0.163	0.258	0.319	0.1065	0.1925	0.2925	0.424	1
YBR001C	NTH2	0.151087	0.834483	0.028	0.083	0.262	0.516	0.094	0.002	0.048	0.33	0.061	0.0425	0.155	0.423	1
YER041W	YEN1	0.108777	0.822396	0.131	0.119	0.251	0.371	0.057	0.13	0.074	0.473	0.094	0.1245	0.1625	0.422	1
YCR091W	KIN82	0.430254	0.182464	0.113	0.18	0.392	0.762	0.045	0.026	-0.105	0.08	0.079	0.103	0.1435	0.421	1
YDR109C	YDR109C	0.285798	0.9373	0.172	0.284	0.187	0.626	-0.024	-0.022	0.024	0.216	0.074	0.131	0.1055	0.421	1
YOR375C	GDH1	0.196157	0.384746	0.089	0.101	0.386	0.275	0.18	0.328	0.292	0.567	0.1345	0.2145	0.339	0.421	1
YEL041W	YEF1	0.258346	0.855166	0.001	0.435	0.227	0.568	-0.139	0.047	0.128	0.273	-0.069	0.241	0.1775	0.4205	1
YDR072C	IPT1	0.897206	-0.877377	0.125	0.128	0.086	-0.39	0.221	0.402	0.801	1.23	0.173	0.265	0.4435	0.42	1
YOR298C-A	MBF1	0.132001	0.979911	0.119	0.109	0.125	0.502	0.027	-0.051	0.037	0.335	0.073	0.029	0.081	0.4185	1
YBR285W	YBR285W	0.286169	0.719789	0.237	0.302	0.058	0.619	0.118	-0.07	-0.03	0.21	0.1775	0.116	0.014	0.4145	1
YGL222C	EDC1	0.225248	0.391937	0.086	0.056	0.362	0.464	0.106	0.061	-0.077	0.365	0.096	0.0585	0.1425	0.4145	1
YPL226W	NEW1	0.97376	0.517654	0.516	0.737	0.685	1.002	-0.34	-0.288	-0.108	-0.173	0.088	0.2245	0.2885	0.4145	1
YBR292C	YBR292C	0.149976	0.92638	0.127	0.061	0.292	0.546	0.112	0.156	0.187	0.282	0.1195	0.1085	0.2395	0.414	1
YMR172W	HOT1	0.096972	0.775771	0.101	0.255	0.358	0.418	0.151	0.078	0.297	0.41	0.126	0.1665	0.3275	0.414	1
YPL219W	PCL8	0.186196	0.042954	0.269	0.384	0.512	0.582	0.285	0.294	0.38	0.246	0.277	0.339	0.446	0.414	1
YMR285C	NGL2	0.324621	0.894911	0.125	0.241	0.215	0.634	-0.027	-0.057	-0.123	0.192	0.049	0.092	0.046	0.413	1
YNL333W	SNZ2	0.2592	0.367798	0.165	-0.231	0.432	0.27	0.178	0.067	0.119	0.556	0.1715	-0.082	0.2755	0.413	1
YGL231C	YGL231C	0.464342	0.396258	-0.007	0.206	-0.885	0.313	-0.134	-0.112	-0.045	0.512	-0.0705	0.047	-0.465	0.4125	1
YNR065C	YSN1	0.137191	0.871563	0.026	0.008	0.248	0.53	0.095	0.122	0.296	0.295	0.0605	0.065	0.272	0.4125	1
YGR108W	CLB1	0.520066	0.989568	0.043	0.223	0.255	0.75	-0.406	-0.23	-0.212	0.074	-0.1815	-0.0035	0.0215	0.412	1
YKL147C	YKL147C	0.141015	0.845132	-0.011	0.092	0.319	0.55	0.044	0.104	0.333	0.274	0.0165	0.098	0.326	0.412	1
YPR118W	YPR118W	0.351053	0.869576	0.07	-0.011	0.383	0.567	-0.167	-0.264	-0.143	0.257	-0.0485	-0.1375	0.12	0.412	1
YCL024W	KCC4	0.177311	0.620435	0.077	-0.034	0.398	0.378	0.085	-0.044	0.05	0.445	0.081	-0.039	0.224	0.4115	1
YPL092W	SSU1	0.154208	0.757738	0.03	0.145	0.045	0.329	0.154	0.107	0.271	0.494	0.092	0.126	0.158	0.4115	1
YPL261C	YPL261C	0.339766	0.318349	0.193	-0.14	0.369	0.195	-0.002	0.303	0.569	0.628	0.0955	0.0815	0.469	0.4115	1
YDR330W	UBX5	0.240751	0.991386	0.127	0.172	0.449	0.596	0.078	0.081	0.16	0.225	0.1025	0.1265	0.3045	0.4105	1
YKL039W	PTM1	0.717602	-0.481076	0.003	-0.049	-0.194	-0.014	0.309	0.513	0.771	0.834	0.156	0.232	0.2885	0.41	1
YOL063C	CRT10	0.164089	0.440058	0.126	0.377	0.242	0.45	0.064	0.306	0.546	0.37	0.095	0.3415	0.394	0.41	1
YMR215W	GAS3	0.178451	0.693019	-0.011	0.04	0.336	0.405	0.034	-0.093	0.008	0.414	0.0115	-0.0265	0.172	0.4095	1
YDR073W	SNF11	0.115156	0.883244	-0.102	-0.06	-0.191	0.417	-0.19	-0.178	-0.015	0.397	-0.146	-0.119	-0.103	0.407	1
YOR041C	YOR041C	0.149324	0.9758	-0.032	0.006	0.088	0.282	-0.103	0.107	0.195	0.532	-0.0675	0.0565	0.1415	0.407	1
YOR114W	YOR114W	0.091332	0.946058	0.07	0.102	0.201	0.327	0.021	0.096	0.128	0.487	0.0455	0.099	0.1645	0.407	1
YPR040W	TIP41	0.417939	0.219503	0.175	0.275	0.349	0.082	0.216	0.426	0.852	0.731	0.1955	0.3505	0.6005	0.4065	1
YKR091W	SRL3	0.257161	0.857646	0.298	0.203	0.377	0.563	-0.02	0.025	0.195	0.249	0.139	0.114	0.286	0.406	1
YDL236W	PHO13	0.294051	0.552855	0.075	-0.097	0.035	0.297	0.077	0.147	0.525	0.512	0.076	0.025	0.28	0.4045	1
YDR242W	AMD2	0.359627	0.820442	0.016	0.172	0.224	0.699	-0.152	-0.162	0.049	0.11	-0.068	0.005	0.1365	0.4045	1
YDR218C	SPR28	0.258343	0.912363	0.113	0.33	0.35	0.461	-0.215	-0.037	0.244	0.345	-0.051	0.1465	0.297	0.403	1
YMR306C-A	YMR306C-A	0.197135	0.706347	0.113	0.143	0.3	0.314	-0.033	-0.032	0.032	0.492	0.04	0.0555	0.166	0.403	1
YNL034W	YNL034W	0.225263	0.495188	0.004	0.158	-0.246	0.397	0.017	0.054	0.192	0.409	0.0105	0.106	-0.027	0.403	1
YOL042W	NGL1	0.365606	-0.03937	-0.013	0.302	0.088	0.419	0.064	0.063	0.774	0.387	0.0255	0.1825	0.431	0.403	1
YDL034W	YDL034W	0.145931	0.602006	0.058	0.345	0.443	0.409	0.061	0.462	0.176	0.395	0.0595	0.4035	0.3095	0.402	1
YMR147W	YMR147W	0.130849	0.931693	0.17	0.177	0.334	0.406	0.023	0.054	0.156	0.398	0.0965	0.1155	0.245	0.402	1
YER174C	GRX4	0.34862	-0.053528	0.14	0.096	0.452	0.444	0.15	0.022	-0.236	0.359	0.145	0.059	0.108	0.4015	1
YLR016C	PML1	0.288921	0.502213	0.166	0.191	0.24	0.644	0.03	0.154	-0.039	0.158	0.098	0.1725	0.1005	0.401	1
YDR115W	YDR115W	1.24521	0.508289	0.27	0.248	1.674	0.859	-0.583	-0.516	-0.338	-0.059	-0.1565	-0.134	0.668	0.4	0
YBL071C	YBL071C	0.376737	0.542621	-0.176	0.024	-0.082	0.741	-0.007	-0.084	-0.329	0.058	-0.0915	-0.03	-0.2055	0.3995	1
YLR228C	ECM22	0.353908	0.789256	0.006	-0.102	-0.119	0.256	0.234	0.281	0.35	0.543	0.12	0.0895	0.1155	0.3995	1
YOL061W	PRS5	0.712622	0.409242	-0.381	-0.849	-1.343	0.165	-1.01	-0.431	-0.229	0.634	-0.6955	-0.64	-0.786	0.3995	1
YBR176W	ECM31	0.496437	-0.818615	0.078	0.21	0.231	0.883	0.104	0.007	0.148	-0.085	0.091	0.1085	0.1895	0.399	1
YJR037W	YJR037W	0.186917	0.674311	0.139	0.108	0.202	0.496	0.093	0.096	-0.114	0.302	0.116	0.102	0.044	0.399	1
YNL012W	SPO1	0.068806	0.927209	-0.022	0.02	0.263	0.401	0.06	0.051	0.157	0.397	0.019	0.0355	0.21	0.399	1
YOR178C	GAC1	0.190287	0.98784	-0.205	-0.35	0.174	0.492	-0.358	-0.46	-0.098	0.304	-0.2815	-0.405	0.038	0.398	1
YDR279W	RNH202	0.208424	0.582454	0.068	0.291	0.49	0.385	-0.035	0.143	0.115	0.41	0.0165	0.217	0.3025	0.3975	1
YNL135C	FPR1	0.987414	-0.264783	0.481	1.083	-0.653	0.097	-0.831	0.459	0.542	0.698	-0.175	0.771	-0.0555	0.3975	1
YBR064W	YBR064W	0.177583	0.722379	0.089	0.174	0.222	0.382	0.05	0.055	-0.109	0.412	0.0695	0.1145	0.0565	0.397	1
YIL067C	YIL067C	0.285639	0.792897	0.163	-0.019	0.369	0.593	-0.1	0.003	0.048	0.201	0.0315	-0.008	0.2085	0.397	1
YGR123C	PPT1	0.530497	-0.208634	0.019	-0.541	0.396	0.576	0.247	0.098	-0.335	0.214	0.133	-0.2215	0.0305	0.395	1
YGR214W	RPS0A	1.04443	-0.132076	0.959	-0.476	-1.349	0.249	-0.795	-0.446	-0.253	0.54	0.082	-0.461	-0.801	0.3945	1
YBR051W	YBR051W	0.151711	0.756074	0.074	0.189	0.092	0.461	0.103	-0.073	0.024	0.327	0.0885	0.058	0.058	0.394	1
YJR108W	ABM1	0.345446	0.176567	-0.227	0.005	0.253	0.472	0.078	-0.052	-0.344	0.315	-0.0745	-0.0235	-0.0455	0.3935	1
YBR013C	YBR013C	0.111898	0.989461	-0.065	-0.007	-0.073	0.485	0.017	0.01	0.023	0.301	-0.024	0.0015	-0.025	0.393	1
YKL131W	YKL131W	0.14496	0.801317	0.118	-0.236	0.193	0.424	-0.09	-0.047	0.158	0.362	0.014	-0.1415	0.1755	0.393	1
YKR043C	YKR043C	0.262109	-0.315279	0.247	0.471	0.297	0.319	0.081	0.013	0.171	0.466	0.164	0.242	0.234	0.3925	1
YDL219W	DTD1	0.494593	-0.054947	0.165	-0.708	0.217	0.414	0.145	0.277	0.14	0.37	0.155	-0.2155	0.1785	0.392	1
YKL097C	YKL097C	0.186239	0.906529	0.201	0.211	0.404	0.512	-0.023	0.061	0.312	0.272	0.089	0.136	0.358	0.392	1
YML109W	ZDS2	0.132991	0.977328	-0.014	0.01	0.146	0.511	0.043	0.092	0.099	0.269	0.0145	0.051	0.1225	0.39	1
YOL003C	PFA4	0.134989	0.964035	-0.009	0.029	0.144	0.518	0.073	0.051	0.156	0.262	0.032	0.04	0.15	0.39	1
YOL121C	RPS19A	1.02534	0.264184	-0.779	-0.563	-1.834	0.462	-0.891	0.214	0.055	0.318	-0.835	-0.1745	-0.8895	0.39	1
YDR133C	YDR133C	0.138257	0.890851	0.159	0.155	0.317	0.271	0.054	0.084	0.382	0.508	0.1065	0.1195	0.3495	0.3895	1
YOR240W	ABP140_p	0.121889	0.938567	0.012	0.131	0.107	0.318	0.109	0.172	0.274	0.461	0.0605	0.1515	0.1905	0.3895	1
YGL159W	YGL159W	0.256503	0.671669	0.186	0.284	0.451	0.6	0.08	0.076	0.281	0.176	0.133	0.18	0.366	0.388	1
YGR178C	PBP1	0.101692	0.854813	0.024	0.075	0.028	0.443	-0.053	-0.031	0.138	0.333	-0.0145	0.022	0.083	0.388	1
YOR099W	KTR1	0.37337	0.713609	0.072	0.013	0.279	0.661	0.001	-0.226	-0.164	0.114	0.0365	-0.1065	0.0575	0.3875	1
YIR013C	GAT4	0.218137	0.59269	0.068	0.005	0.3	0.598	0.079	0.103	0.259	0.175	0.0735	0.054	0.2795	0.3865	1
YDL242W	YDL242W	0.114959	0.589197	0.135	0.069	0.364	0.319	0.117	0.189	0.221	0.452	0.126	0.129	0.2925	0.3855	1
YFR013W	IOC3	0.204815	0.638295	0.152	0.363	-0.066	0.455	0.023	0.01	0.019	0.316	0.0875	0.1865	-0.0235	0.3855	1
YNL027W	CRZ1	0.184829	0.263444	0.04	0.156	0.151	0.52	0.111	0.17	0.394	0.251	0.0755	0.163	0.2725	0.3855	1
YPL072W	UBP16	0.081589	0.984996	0.173	0.213	0.378	0.435	0.08	0.164	0.302	0.336	0.1265	0.1885	0.34	0.3855	1
YBR047W	FMP23	0.114307	0.909999	0.084	0.183	0.153	0.491	0.128	0.113	0.175	0.279	0.106	0.148	0.164	0.385	1
YBR074W	YBR074W	0.388178	0.150064	0.102	0.251	0.489	0.744	0.046	0.043	0.287	0.026	0.074	0.147	0.388	0.385	1
YPR069C	SPE3	0.194155	0.698239	-0.113	0.276	0.275	0.447	-0.025	-0.051	0.131	0.323	-0.069	0.1125	0.203	0.385	1
YKL146W	AVT3	0.297919	-0.556571	0.192	0.169	0.282	0.68	0.124	0.19	0.256	0.089	0.158	0.1795	0.269	0.3845	1
YLR405W	DUS4	0.426388	0.444203	0.148	-0.415	0.549	0.631	0.115	-0.041	-0.036	0.137	0.1315	-0.228	0.2565	0.384	1
YOR225W	YOR225W	0.160747	0.522414	0.085	0.032	0.41	0.41	0.146	0.107	0.108	0.357	0.1155	0.0695	0.259	0.3835	1
YPL087W	YDC1	0.234675	0.591183	-0.295	0.118	-0.032	0.465	-0.19	-0.196	0.258	0.302	-0.2425	-0.039	0.113	0.3835	1
YPR199C	ARR1	0.207499	0.924768	0.127	0.127	0.574	0.49	0.102	0.076	0.223	0.276	0.1145	0.1015	0.3985	0.383	1
YBR149W	ARA1	0.200854	0.400981	0.023	0.376	0.167	0.356	-0.053	0.004	0.287	0.409	-0.015	0.19	0.227	0.3825	1
YIR020W-B	YIR020W-A	0.460155	0.717875	0.139	0.269	0.464	0.734	-0.082	-0.122	0.079	0.029	0.0285	0.0735	0.2715	0.3815	1
YNL032W	SIW14	0.349448	0.785573	-0.046	0.203	0.348	0.267	-0.447	-0.315	0.265	0.496	-0.2465	-0.056	0.3065	0.3815	1
YMR132C	JLP2	0.082131	0.905999	-0.056	0.138	0.082	0.374	-0.04	-0.024	0.063	0.385	-0.048	0.057	0.0725	0.3795	1
YKR050W	TRK2	0.31882	-0.298924	-0.032	0.223	0.079	0.628	0.148	0.007	0.361	0.13	0.058	0.115	0.22	0.379	1
YAL053W	FLC2	0.326214	0.787445	0.128	-0.117	0.131	0.192	0.407	0.285	0.348	0.565	0.2675	0.084	0.2395	0.3785	1
YPR027C	YPR027C	0.09257	0.849956	0.023	0.102	0.455	0.318	0.107	0.094	0.341	0.437	0.065	0.098	0.398	0.3775	1
YNL087W	TCB2	0.432294	-0.24767	0.116	0.253	0.466	0.509	0.116	0.09	-0.341	0.245	0.116	0.1715	0.0625	0.377	1
YCL069W	VBA3	0.266832	0.680742	0.125	0.011	0.557	0.602	0.092	0.119	0.295	0.151	0.1085	0.065	0.426	0.3765	1
YLR287C-A	RPS30A	3.18447	-0.202329	-0.782	1.13	2.442	1.809	-1.605	-2.01	-2.229	-1.056	-1.1935	-0.44	0.1065	0.3765	0
YMR302C	YME2	0.178669	0.613179	0.047	0.084	0.059	0.517	0.069	-0.11	0.162	0.236	0.058	-0.013	0.1105	0.3765	1
YPL130W	SPO19	0.392735	-0.309252	0.057	0.192	0.552	0.631	0.086	0.108	-0.037	0.119	0.0715	0.15	0.2575	0.375	1
YDR036C	EHD3	0.152118	0.699934	0.035	0.208	0.126	0.257	0.138	0.17	0.285	0.492	0.0865	0.189	0.2055	0.3745	1
YKL132C	RMA1	0.279906	0.14502	0.132	0.04	0.428	0.645	0.128	0.137	0.327	0.103	0.13	0.0885	0.3775	0.374	1
YMR187C	YMR187C	0.158515	0.613122	0.046	0.141	0.233	0.377	0.1	0.011	-0.051	0.371	0.073	0.076	0.091	0.374	1
YMR006C	PLB2	0.33275	0.15957	0.091	-0.015	-0.304	0.466	0.263	0.18	0.28	0.281	0.177	0.0825	-0.012	0.3735	1
YLR123C	YLR123C	0.188607	0.423855	-0.035	0.053	0.349	0.336	0.059	0.03	-0.008	0.41	0.012	0.0415	0.1705	0.373	1
YNL011C	YNL011C	0.688436	0.183377	0.139	-0.494	-0.315	0.184	0.287	0.001	0.904	0.562	0.213	-0.2465	0.2945	0.373	1
YOR215C	YOR215C	0.31764	0.058302	0.064	0.077	0.236	0.685	0.035	0.007	0.328	0.061	0.0495	0.042	0.282	0.373	1
YBL102W	SFT2	0.215892	0.524795	0.087	-0.054	0.35	0.211	0.173	0.218	0.323	0.534	0.13	0.082	0.3365	0.3725	1
YDR003W	RCR2	0.20595	0.805175	0.072	-0.108	-0.212	0.501	-0.006	0.065	0.048	0.244	0.033	-0.0215	-0.082	0.3725	1
YDR112W	IRC2	0.214811	0.361969	-0.011	0.187	0.01	0.536	-0.032	0.065	0.257	0.207	-0.0215	0.126	0.1335	0.3715	1
YPL069C	BTS1	1.71355	-0.68813	1.493	1.221	0.298	1.123	-0.575	-1.025	-0.108	-0.38	0.459	0.098	0.095	0.3715	0
YBR301W	DAN3	0.194586	0.266774	0.218	0.029	0.384	0.212	0.164	0.246	0.353	0.529	0.191	0.1375	0.3685	0.3705	1
YLR381W	CTF3	0.188931	0.959873	-0.051	-0.077	-0.308	0.193	-0.054	-0.181	-0.385	0.548	-0.0525	-0.129	-0.3465	0.3705	1
YFL046W	FMP32	0.326377	0.91365	0.1	0.197	0.489	0.619	-0.043	0.053	0.119	0.121	0.0285	0.125	0.304	0.37	1
YIL055C	YIL055C	0.317544	0.718434	0.021	-0.107	0.418	0.562	0.013	-0.206	-0.078	0.178	0.017	-0.1565	0.17	0.37	1
YNR063W	YNR063W	0.096724	0.989509	0.078	0.091	0.279	0.459	0.064	0.092	0.207	0.28	0.071	0.0915	0.243	0.3695	1
YGL032C	AGA2	0.12075	0.572803	0.158	0.182	0.053	0.429	0.002	0.254	0.172	0.308	0.08	0.218	0.1125	0.3685	1
YAL066W	YAL066W	0.642733	-0.24465	0.344	-0.167	-0.027	1.008	0.286	-0.113	-0.115	-0.272	0.315	-0.14	-0.071	0.368	1
YER124C	DSE1	0.159422	0.989954	0.077	0.044	0.13	0.522	0.109	0.111	0.137	0.212	0.093	0.0775	0.1335	0.367	1
YJL051W	IRC8	0.468935	-0.743848	0.036	-0.226	0.528	0.73	0.209	0.252	0.226	0.002	0.1225	0.013	0.377	0.366	1
YHR184W	SSP1	0.157739	0.7397	0.028	0.013	-0.049	0.468	-0.009	-0.181	0.087	0.263	0.0095	-0.084	0.019	0.3655	1
YLR112W	YLR112W	0.159774	0.897726	0.073	0.183	0.276	0.433	0.014	-0.016	0.074	0.298	0.0435	0.0835	0.175	0.3655	1
YPL264C	YPL264C	0.158403	0.756834	0.126	-0.182	0.227	0.274	0.088	0.074	0.252	0.455	0.107	-0.054	0.2395	0.3645	1
YGR290W	YGR290W	0.24778	0.567997	-0.111	0.18	0.247	0.142	-0.014	0.055	0.4	0.586	-0.0625	0.1175	0.3235	0.364	1
YBR182C	SMP1	0.349342	0.829381	-0.054	-0.358	-0.193	0.235	0.12	0.029	0.299	0.492	0.033	-0.1645	0.053	0.3635	1
YOR202W	HIS3	0.202974	0.180705	0.114	0.176	0.286	0.544	0.09	0.183	0.468	0.182	0.102	0.1795	0.377	0.363	1
YAR023C	YAR023C	0.346828	-0.266083	0.098	-0.121	0.393	0.672	0.251	0.109	0.25	0.052	0.1745	-0.006	0.3215	0.362	1
YGL146C	YGL146C	0.461413	-0.963195	0.038	-0.187	0.551	0.712	0.068	0.122	0.036	0.012	0.053	-0.0325	0.2935	0.362	1
YHR067W	HTD2	0.157968	0.584857	-0.017	0.218	0.237	0.395	0.195	0.264	0.457	0.329	0.089	0.241	0.347	0.362	1
YDR307W	YDR307W	0.354855	0.49672	0.073	0.19	0.31	0.584	-0.002	-0.055	-0.179	0.138	0.0355	0.0675	0.0655	0.361	1
YFL047W	RGD2	0.330556	0.267038	0.203	0.097	0.507	0.504	0.084	-0.021	-0.064	0.216	0.1435	0.038	0.2215	0.36	1
YHR185C	PFS1	0.227176	0.677906	-0.21	0.045	0.02	0.318	-0.141	-0.074	0.445	0.401	-0.1755	-0.0145	0.2325	0.3595	1
YKL090W	CUE2	0.136951	0.908292	0.098	0.162	0.448	0.475	0.139	0.176	0.309	0.243	0.1185	0.169	0.3785	0.359	1
YHR092C	HXT4	0.16832	0.891935	0.015	0.078	0.406	0.459	0.069	0.049	0.143	0.258	0.042	0.0635	0.2745	0.3585	1
YOL060C	MAM3	0.274739	0.228867	-0.015	0.312	0.196	0.149	-0.14	0.002	0.317	0.568	-0.0775	0.157	0.2565	0.3585	1
YCL006C	YCL006C_d	0.213667	0.314937	0.102	-0.007	0.529	0.349	0.101	0.122	0.122	0.367	0.1015	0.0575	0.3255	0.358	1
YLL015W	BPT1	0.281261	0.70902	0.152	0.103	0.449	0.587	0.023	0.098	0.149	0.129	0.0875	0.1005	0.299	0.358	1
YML101C	CUE4	0.069392	0.931597	0.038	0.012	0.311	0.36	0.088	0.103	0.219	0.356	0.063	0.0575	0.265	0.358	1
YLR146C	SPE4	0.298986	-0.039227	0.048	0.171	0.376	0.327	0.067	0.012	-0.197	0.387	0.0575	0.0915	0.0895	0.357	1
YNL212W	VID27	0.33419	0.123988	0.121	0.421	0.173	0.448	-0.022	-0.197	0.067	0.266	0.0495	0.112	0.12	0.357	1
YBR226C	YBR226C	0.250818	0.471118	0.36	0.757	0.804	0.127	0.331	0.629	0.647	0.585	0.3455	0.693	0.7255	0.356	1
YGL096W	TOS8	0.100755	0.917368	0.136	0.219	0.388	0.285	0.113	0.127	0.495	0.427	0.1245	0.173	0.4415	0.356	1
YMR160W	YMR160W	0.408632	0.626072	0.181	0.378	0.44	0.655	-0.102	-0.02	0.172	0.057	0.0395	0.179	0.306	0.356	1
YBR188C	NTC20	0.253122	0.214619	-0.004	-0.023	0.401	0.145	0.042	0.132	0.171	0.566	0.019	0.0545	0.286	0.3555	1
YKL107W	YKL107W	0.623854	0.371998	-0.037	-1.036	0.332	0.238	0.228	0.14	0.11	0.471	0.0955	-0.448	0.221	0.3545	1
YGL254W	FZF1	0.163149	0.962799	0.093	0.073	0.362	0.487	0.082	0.117	0.18	0.22	0.0875	0.095	0.271	0.3535	1
YEL054C	RPL12A	1.56456	0.55376	1.327	1.516	0.453	0.857	-0.21	-0.528	-1.042	-0.151	0.5585	0.494	-0.2945	0.353	0
YGL005C	COG7	0.716534	-0.986285	0.163	0.129	-0.193	0.242	0.507	0.666	1.071	0.464	0.335	0.3975	0.439	0.353	1
YGL081W	YGL081W	0.44958	0.462276	-0.023	0.111	0.171	0.643	-0.231	0.05	-0.481	0.063	-0.127	0.0805	-0.155	0.353	1
YNL289W	PCL1	0.147718	0.353092	0.109	0.337	0.423	0.289	0.089	0.2	0.195	0.416	0.099	0.2685	0.309	0.3525	1
YKR106W	YKR106W	0.206145	0.039535	0.123	0.033	0.342	0.188	0.15	0.12	0.108	0.515	0.1365	0.0765	0.225	0.3515	1
YOR197W	MCA1	0.301052	0.652711	0.168	0.276	0.381	0.578	0.07	0.083	0.05	0.124	0.119	0.1795	0.2155	0.351	1
YPL205C	YPL205C	1.14175	-0.051568	1.208	0.733	0.206	0.79	-0.507	-0.308	-0.441	-0.088	0.3505	0.2125	-0.1175	0.351	1
YKL222C	YKL222C	0.277689	0.055133	0.123	0.076	0.021	0.135	0.052	0.174	0.351	0.565	0.0875	0.125	0.186	0.35	1
YLL005C	SPO75	0.092592	0.933329	0.007	0.158	0.299	0.419	-0.08	0.076	0.319	0.279	-0.0365	0.117	0.309	0.349	1
YFR046C	CNN1	0.445256	0.434909	0.142	-0.673	0.331	0.149	0.24	0.099	0.163	0.548	0.191	-0.287	0.247	0.3485	1
YNL332W	THI12	0.041791	0.966456	0.132	0.117	0.265	0.349	0.102	0.071	0.328	0.348	0.117	0.094	0.2965	0.3485	1
YGR066C	YGR066C	0.118496	0.907067	0.184	0.143	-0.013	0.331	0.077	-0.055	-0.079	0.365	0.1305	0.044	-0.046	0.348	1
YDL229W	SSB1	0.360796	-0.118208	0.282	-0.139	0.112	0.648	0.197	0.171	-0.125	0.047	0.2395	0.016	-0.0065	0.3475	1
YIL023C	YKE4	0.443315	-0.232915	0.124	-0.004	0.308	0.732	0.178	-0.063	-0.126	-0.037	0.151	-0.0335	0.091	0.3475	1
YOR298W	MUM3	0.260006	0.202103	0.033	0.128	0.393	0.415	0.084	-0.007	-0.088	0.28	0.0585	0.0605	0.1525	0.3475	1
YPL191C	YPL191C	0.141714	0.762794	-0.021	0.123	0.302	0.213	-0.006	0.032	0.301	0.481	-0.0135	0.0775	0.3015	0.347	1
YFR032C	YFR032C	0.162131	0.865309	0.069	0.191	0.291	0.378	-0.041	0.022	0.045	0.315	0.014	0.1065	0.168	0.3465	1
YGR173W	RBG2	0.222575	0.995798	-0.006	0.047	-0.492	0.514	-0.032	0.023	-0.201	0.179	-0.019	0.035	-0.3465	0.3465	1
YKL103C	LAP4	0.350951	-0.385053	0.162	-0.038	0.553	0.275	0.098	0.127	-0.111	0.418	0.13	0.0445	0.221	0.3465	1
YPL164C	MLH3	0.165323	0.982078	0.137	0.221	0.278	0.424	-0.053	0.09	0.099	0.269	0.042	0.1555	0.1885	0.3465	1
YPL081W	RPS9A	0.400766	0.453803	0.025	0.487	0.039	0.543	-0.145	-0.177	-0.077	0.144	-0.06	0.155	-0.019	0.3435	1
YBR033W	EDS1	0.333629	-0.364247	0.01	0.144	0.492	0.29	0.095	0.116	-0.161	0.394	0.0525	0.13	0.1655	0.342	1
YMR016C	SOK2	1.14684	0.234074	0.404	0.467	-0.649	-0.325	0.912	1.17	1.003	1.009	0.658	0.8185	0.177	0.342	1
YPL067C	YPL067C	0.108699	0.933071	0.108	0.287	0.074	0.409	0.039	0.133	0.078	0.272	0.0735	0.21	0.076	0.3405	1
YPL086C	ELP3	0.656163	-0.010524	0.712	0.733	0.356	0.84	0.163	0.199	-0.015	-0.159	0.4375	0.466	0.1705	0.3405	1
YDR534C	FIT1	0.211615	0.753186	0.256	0.226	0.179	0.47	0.186	0.058	-0.101	0.21	0.221	0.142	0.039	0.34	1
YDL117W	CYK3	1.92752	-0.693772	1.812	1.851	0.565	1.637	-0.392	0.044	0.632	-0.958	0.71	0.9475	0.5985	0.3395	0
YDR440W	DOT1	0.422548	0.621939	-0.003	-0.827	0.167	0.461	-0.002	-0.054	-0.072	0.217	-0.0025	-0.4405	0.0475	0.339	1
YML081W	YML081W	0.477981	-0.092127	0.223	0.063	0.181	0.211	0.152	0.437	1.02	0.466	0.1875	0.25	0.6005	0.3385	1
YGR210C	YGR210C	0.383028	0.521508	-0.018	0.166	0.108	0.608	-0.033	-0.101	-0.365	0.068	-0.0255	0.0325	-0.1285	0.338	1
YOR173W	DCS2	0.33144	0.344169	-0.006	0.292	0.182	0.197	-0.328	-0.21	0.113	0.478	-0.167	0.041	0.1475	0.3375	1
YOR087W	YVC1	0.493925	0.93601	0.14	0.222	0.325	0.653	-0.33	-0.171	-0.122	0.02	-0.095	0.0255	0.1015	0.3365	1
YLL007C	YLL007C	0.762926	-0.830909	0.356	0.653	-0.604	0.554	0.363	0.483	0.848	0.117	0.3595	0.568	0.122	0.3355	1
YAL036C	RBG1	0.347733	-0.069049	-0.046	-0.231	0.211	0.642	0.186	-0.013	0.138	0.028	0.07	-0.122	0.1745	0.335	1
YPL189W	GUP2	0.185329	0.711963	0.021	0.193	0.156	0.324	-0.021	0.087	-0.196	0.346	0	0.14	-0.02	0.335	1
YPR115W	YPR115W	0.77699	0.748948	0.045	-0.144	0.208	0.927	-0.35	-0.641	-0.573	-0.257	-0.1525	-0.3925	-0.1825	0.335	1
YPL008W	CHL1	0.883786	0.618059	-0.224	0.398	-1.719	0.573	-0.087	0.219	-0.032	0.096	-0.1555	0.3085	-0.8755	0.3345	1
YBR145W	ADH5	0.288052	0.527571	0.139	0.246	0.405	0.577	0.04	0.049	0.188	0.091	0.0895	0.1475	0.2965	0.334	1
YBL066C	SEF1	0.199916	0.254766	0.007	0.309	0.141	0.261	-0.021	-0.061	0.175	0.406	-0.007	0.124	0.158	0.3335	1
YLR296W	YLR296W	0.165331	0.534784	0.106	0.138	0.348	0.494	0.127	0.082	0.32	0.17	0.1165	0.11	0.334	0.332	1
YBR083W	TEC1	0.141104	0.986597	0.012	0.026	0.194	0.465	0.008	0.002	0.109	0.197	0.01	0.014	0.1515	0.331	1
YBR170C	NPL4	0.664858	0.91282	0.056	-0.267	-1.711	0.385	0.458	0.427	-0.656	0.276	0.257	0.08	-1.1835	0.3305	1
YLR154C	RNH203	0.176683	0.672632	0.117	-0.072	0.252	0.454	0.097	0.085	0.055	0.207	0.107	0.0065	0.1535	0.3305	1
YLR294C	YLR294C	0.225381	0.755257	0.038	-0.172	0.269	0.258	0.082	0.203	0.468	0.403	0.06	0.0155	0.3685	0.3305	1
YNL309W	STB1	0.248109	0.997629	0.169	0.138	0.331	0.465	-0.071	-0.079	0.069	0.195	0.049	0.0295	0.2	0.33	1
YGR049W	SCM4	1.34596	0.581787	0.197	0.397	0.315	1.201	-0.981	-1.039	-0.556	-0.542	-0.392	-0.321	-0.1205	0.3295	0
YPR198W	SGE1	0.186546	0.678804	0.241	0.047	0.061	0.474	0.197	0.076	-0.169	0.185	0.219	0.0615	-0.054	0.3295	1
YBR014C	YBR014C	0.124252	0.838933	0.093	0.172	0.254	0.424	0.062	0.024	0.209	0.232	0.0775	0.098	0.2315	0.328	1
YLR392C	YLR392C	0.333428	0.186212	0.05	-0.126	-0.338	0.25	-0.203	-0.229	0.25	0.406	-0.0765	-0.1775	-0.044	0.328	1
YCL025C	AGP1	0.168061	0.657619	-0.131	0.075	0.157	0.444	0.097	0.063	0.238	0.211	-0.017	0.069	0.1975	0.3275	1
YHR138C	YHR138C	0.236556	0.557796	0.067	-0.034	0.286	0.545	0.027	0.083	0.147	0.11	0.047	0.0245	0.2165	0.3275	1
YPL202C	AFT2	0.179626	0.759027	0.106	0.196	-0.107	0.466	0.115	0.054	0.069	0.187	0.1105	0.125	-0.019	0.3265	1
YPR122W	AXL1	0.161423	0.472609	0.024	0.129	0.312	0.278	0.03	0.001	0.032	0.375	0.027	0.065	0.172	0.3265	1
YPR054W	SMK1	0.242392	0.665596	0.152	0.266	0.236	0.416	0.058	-0.032	-0.088	0.236	0.105	0.117	0.074	0.326	1
YLR306W	UBC12	0.214143	0.037864	0.149	0.302	0.136	0.521	0.221	0.172	0.044	0.13	0.185	0.237	0.09	0.3255	1
YGR207C	YGR207C	0.227393	0.142778	0.038	0.154	0.002	0.209	0.047	0.012	0.367	0.44	0.0425	0.083	0.1845	0.3245	1
YJL060W	BNA3	0.103324	0.53886	0.124	0.157	0.088	0.313	0.041	0.138	0.275	0.335	0.0825	0.1475	0.1815	0.324	1
YPR164W	MMS1	1.60497	-0.242781	-1.368	0.251	0.514	0.758	-0.427	-1.892	-1.504	-0.11	-0.8975	-0.8205	-0.495	0.324	0
YHR029C	YHI9	0.38002	0.697055	0.218	0.439	0.426	0.469	-0.126	-0.087	0.113	0.178	0.046	0.176	0.2695	0.3235	1
YKL140W	TGL1	0.146968	0.729344	0.115	0.004	0.004	0.202	-0.016	-0.004	0.107	0.444	0.0495	0	0.0555	0.323	1
YDR419W	RAD30	0.235677	0.907674	0.094	0.297	0.419	0.428	-0.088	-0.034	0.232	0.217	0.003	0.1315	0.3255	0.3225	1
YMR163C	INP2	0.140366	0.612512	0.034	0.065	0.027	0.407	-0.017	-0.08	0.187	0.235	0.0085	-0.0075	0.107	0.321	1
YBR130C	SHE3	0.689916	-0.665523	0.047	-0.302	-0.078	-0.348	-0.004	0.037	-0.039	0.988	0.0215	-0.1325	-0.0585	0.32	1
YGL216W	KIP3	0.734322	0.884168	-0.024	0.006	1.272	0.716	-0.082	-0.117	0.044	-0.078	-0.053	-0.0555	0.658	0.319	1
YGR146C	YGR146C	0.188717	0.400075	0.071	0.004	-0.101	0.443	0.035	0.063	0.175	0.195	0.053	0.0335	0.037	0.319	1
YOR378W	YOR378W	0.15164	0.500577	0.014	0.075	0.419	0.235	0.189	0.156	0.256	0.403	0.1015	0.1155	0.3375	0.319	1
YPL163C	SVS1	0.127155	0.707939	0.041	0.175	-0.012	0.42	0.166	0.147	-0.096	0.217	0.1035	0.161	-0.054	0.3185	1
YDL144C	YDL144C	0.246293	0.92837	0.088	0.452	0.39	0.468	-0.098	0.154	0.219	0.168	-0.005	0.303	0.3045	0.318	1
YGR234W	YHB1	0.209474	0.889721	0.127	0.141	0.343	0.449	0	0.043	0.06	0.185	0.0635	0.092	0.2015	0.317	1
YLR362W	STE11	5.86114	-0.540558	3.614	3.284	4.757	4.418	-0.136	-1.01	-1.378	-3.784	1.739	1.137	1.6895	0.317	0
YMR319C	FET4	0.137315	0.73153	0.153	-0.005	0.386	0.348	0.19	0.223	0.521	0.286	0.1715	0.109	0.4535	0.317	1
YKL201C	MNN4	0.142666	0.737007	0.004	0.241	0.014	0.319	-0.033	-0.035	-0.048	0.314	-0.0145	0.103	-0.017	0.3165	1
YLR255C	YLR255C	0.199659	0.30176	0.084	0.086	0.396	0.132	0.022	0.051	0.261	0.501	0.053	0.0685	0.3285	0.3165	1
YIL059C	YIL059C	0.390269	-0.9368	0.084	0.073	0.339	0.671	0.153	0.092	0.025	-0.04	0.1185	0.0825	0.182	0.3155	1
YIR038C	GTT1	0.218273	0.55015	0.083	-0.218	0.127	0.293	0.084	-0.129	-0.298	0.338	0.0835	-0.1735	-0.0855	0.3155	1
YMR251W	GTO3	0.315812	-0.333384	0.218	0.105	0.464	0.234	0.099	-0.024	-0.121	0.395	0.1585	0.0405	0.1715	0.3145	1
YPR132W	RPS23B	0.657134	-0.084841	-0.457	0.477	0.914	0.418	-0.125	0.124	-0.29	0.211	-0.291	0.3005	0.312	0.3145	1
YDL169C	UGX2	0.404228	0.68561	0.014	0.124	0.498	0.546	-0.084	-0.191	-0.076	0.082	-0.035	-0.0335	0.211	0.314	1
YDR517W	GRH1	0.310539	0.534124	0.008	0.007	0.475	0.572	0.09	-0.099	0.158	0.055	0.049	-0.046	0.3165	0.3135	1
YBR273C	UBX7	0.072101	0.845667	-0.016	0.055	0.168	0.299	0.109	-0.009	0.185	0.327	0.0465	0.023	0.1765	0.313	1
YDR524C	AGE1	0.401507	0.490728	0.142	0.202	0.374	0.586	0.003	-0.293	0.087	0.04	0.0725	-0.0455	0.2305	0.313	1
YDR421W	ARO80	0.198192	0.190621	0.068	0.194	0.207	0.151	0.02	-0.028	0.25	0.473	0.044	0.083	0.2285	0.312	1
YDR169C	STB3	0.271071	0.948874	-0.128	-0.054	0.221	0.202	-0.032	0.2	0.636	0.421	-0.08	0.073	0.4285	0.3115	1
YHR005C	GPA1	0.115912	0.929257	0.115	-0.201	0.104	0.405	0.134	-0.13	-0.01	0.217	0.1245	-0.1655	0.047	0.311	1
YHR153C	SPO16	0.419601	-0.360392	-0.136	0.163	0.306	0.686	0.036	-0.086	0.082	-0.064	-0.05	0.0385	0.194	0.311	1
YNR032C-A	HUB1	0.235906	0.678158	0.055	-0.064	0.158	0.526	-0.136	-0.085	0.13	0.096	-0.0405	-0.0745	0.144	0.311	1
YER188W	YER188W	0.222543	0.883265	0.138	-0.401	0.428	0.317	0.185	-0.032	0.184	0.303	0.1615	-0.2165	0.306	0.31	1
YGR041W	BUD9	0.227665	0.716369	0.021	0.175	0.337	0.479	0.028	-0.062	0.145	0.141	0.0245	0.0565	0.241	0.31	1
YOL054W	PSH1	0.126966	0.97347	0.104	0.098	0.201	0.31	-0.051	-0.036	0.051	0.31	0.0265	0.031	0.126	0.31	1
YDR428C	YDR428C	0.543684	-0.862973	0.118	0.224	0.329	0.822	0.073	-0.04	0.084	-0.203	0.0955	0.092	0.2065	0.3095	1
YGR025W	YGR025W	0.238175	0.986274	0.166	0.194	0.468	0.436	-0.014	0.002	0.162	0.183	0.076	0.098	0.315	0.3095	1
YBR221W-A	YBR221W-A	0.303413	-0.401035	0.312	0.471	0.192	0.368	-0.1	0.232	0.549	0.25	0.106	0.3515	0.3705	0.309	1
YJR125C	ENT3	0.339915	0.692942	0.033	0.234	0.243	0.113	0.031	0.304	0.794	0.505	0.032	0.269	0.5185	0.309	1
YKL129C	MYO3	0.441203	0.681993	0.077	-0.734	-0.048	0.223	0.2	0.108	0.11	0.395	0.1385	-0.313	0.031	0.309	1
YBR006W	UGA2	0.194881	0.813033	-0.04	0.075	0.433	0.467	0.045	-0.043	0.259	0.15	0.0025	0.016	0.346	0.3085	1
YDR171W	HSP42	0.166065	0.166495	0.119	0.174	0.037	0.347	-0.012	0.02	0.289	0.27	0.0535	0.097	0.163	0.3085	1
YER185W	YER185W	0.0929	0.785711	0.115	0.12	0.365	0.318	0.122	0.064	0.189	0.299	0.1185	0.092	0.277	0.3085	1
YIL013C	PDR11	0.267624	0.034782	0.035	-0.021	-0.106	0.549	0.017	-0.014	0.128	0.068	0.026	-0.0175	0.011	0.3085	1
YDR259C	YAP6	0.655434	-0.338731	-0.049	-0.092	-0.357	-0.347	-0.024	-0.132	-0.364	0.963	-0.0365	-0.112	-0.3605	0.308	1
YCL002C	YCL002C	0.254637	0.30207	0.031	0.304	0.226	0.398	0.008	-0.151	0.088	0.217	0.0195	0.0765	0.157	0.3075	1
YDR124W	YDR124W	0.215878	0.519988	-0.071	0.13	0.365	0.191	-0.121	-0.147	0.133	0.422	-0.096	-0.0085	0.249	0.3065	1
YDR015C	YDR015C	0.131023	0.329977	0.071	0.183	0.331	0.187	0.157	0.181	0.263	0.425	0.114	0.182	0.297	0.306	1
YOR088W	YVC1_p	0.290741	-0.137529	-0.122	0.109	-0.12	0.528	0.148	-0.074	0.066	0.084	0.013	0.0175	-0.027	0.306	1
YDR274C	YDR274C	0.351865	0.535039	0.083	0.451	0.364	0.466	-0.195	-0.105	0.288	0.145	-0.056	0.173	0.326	0.3055	1
YNL045W	YNL045W	0.210944	0.780447	0.054	0.239	0.437	0.459	0.086	0.065	0.208	0.152	0.07	0.152	0.3225	0.3055	1
YAR037W	YAR037W	0.159603	0.67934	0.162	-0.104	-0.103	0.412	0.18	0.109	-0.205	0.198	0.171	0.0025	-0.154	0.305	1
YJR091C	JSN1	0.406736	0.560241	-0.084	-0.117	0.192	-0.031	0.1	0.177	0.494	0.64	0.008	0.03	0.343	0.3045	1
YMR304C-A	YMR304C-A	0.277911	0.807244	0.025	-0.077	0.33	0.553	-0.002	-0.137	0.09	0.056	0.0115	-0.107	0.21	0.3045	1
YMR313C	TGL3	0.232853	-0.215375	0.165	0.143	-0.048	0.16	0.123	0.034	0.298	0.449	0.144	0.0885	0.125	0.3045	1
YPR002W	PDH1	0.354846	0.942643	0.09	0.311	0.39	0.501	-0.183	-0.1	0.066	0.107	-0.0465	0.1055	0.228	0.304	1
YPL048W	CAM1	0.361164	0.805111	-0.082	0.234	-0.499	0.313	0.179	0.219	0.174	0.291	0.0485	0.2265	-0.1625	0.302	1
YLR434C	YLR434C	0.340501	0.271691	0.078	0.364	0.211	0.339	-0.207	-0.243	0.119	0.264	-0.0645	0.0605	0.165	0.3015	1
YNL074C	MLF3	0.155861	0.044552	0.32	0.353	0.314	0.41	0.132	0.256	0.241	0.193	0.226	0.3045	0.2775	0.3015	1
YKR061W	KTR2	0.189173	0.914331	-0.176	-0.015	-0.223	0.211	0.065	0.049	-0.001	0.389	-0.0555	0.017	-0.112	0.3	1
YOL151W	GRE2	0.285931	0.075189	0.072	0.007	0.215	0.58	0.031	-0.002	0.107	0.02	0.0515	0.0025	0.161	0.3	1
YGR295C	COS6	0.167752	0.343231	0.14	0.032	0.434	0.271	0.083	0.065	0.11	0.328	0.1115	0.0485	0.272	0.2995	1
YIL015C-A	YIL014C-A	0.160684	0.850807	0	-0.127	0.046	0.223	0.037	0.103	0.206	0.376	0.0185	-0.012	0.126	0.2995	1
YMR133W	REC114	0.195609	0.764831	-0.098	0.146	0.399	0.405	0.017	0.125	0.091	0.194	-0.0405	0.1355	0.245	0.2995	1
YOR343C	YOR343C	0.075475	0.997481	-0.059	0.021	0.193	0.317	0.052	0.116	0.205	0.281	-0.0035	0.0685	0.199	0.299	1
YKR078W	YKR078W	0.459165	0.214629	0.176	0.223	0.34	0.615	-0.047	-0.074	-0.212	-0.018	0.0645	0.0745	0.064	0.2985	1
YPR192W	AQY1	0.142238	0.650952	0.139	-0.048	0.29	0.415	0.126	0.114	0.275	0.182	0.1325	0.033	0.2825	0.2985	1
YMR165C	PAH1	1.86653	0.374696	0.08	1.426	1.735	1.096	-0.873	-0.571	-0.813	-0.5	-0.3965	0.4275	0.461	0.298	0
YPL137C	GIP3	0.240374	0.920774	0.089	0.076	-0.274	0.152	0.064	-0.121	-0.602	0.442	0.0765	-0.0225	-0.438	0.297	1
YJL201W	ECM25	0.064341	0.736075	0.124	0.153	0.114	0.316	0.094	0.06	0.187	0.275	0.109	0.1065	0.1505	0.2955	1
YCR095C	OCA4	0.299654	0.638358	0.125	-0.228	-0.102	0.571	-0.079	-0.237	0.011	0.019	0.023	-0.2325	-0.0455	0.295	1
YNL090W	RHO2	0.217636	0.48248	-0.013	0.208	0.155	0.395	-0.156	-0.089	0.355	0.193	-0.0845	0.0595	0.255	0.294	1
YJL016W	YJL016W	0.451716	0.685982	0.613	0.163	-0.142	0.397	0.034	-0.48	-0.299	0.19	0.3235	-0.1585	-0.2205	0.2935	1
YKR060W	UTP30	0.272625	0.710156	-0.025	-0.025	-0.116	0.548	-0.051	-0.217	-0.09	0.039	-0.038	-0.121	-0.103	0.2935	1
YOR213C	SAS5	0.357303	0.382937	0.092	-0.573	0.257	0.244	0.156	0.11	0.083	0.343	0.124	-0.2315	0.17	0.2935	1
YER096W	SHC1	0.19051	0.544429	0.036	0.068	0.157	0.366	0.104	-0.092	-0.149	0.22	0.07	-0.012	0.004	0.293	1
YLL045C	RPL8B	0.195862	0.643978	0.183	-0.21	0.057	0.244	0.026	-0.135	-0.28	0.342	0.1045	-0.1725	-0.1115	0.293	1
YGR288W	MAL13	0.253426	0.150607	0.015	0.039	0.39	0.443	0.115	-0.004	-0.003	0.142	0.065	0.0175	0.1935	0.2925	1
YML048W-A	YML047W-A	1.14668	-0.443062	-0.023	-1.445	0.637	0.834	0.378	-0.035	-0.755	-0.249	0.1775	-0.74	-0.059	0.2925	1
YPR173C	VPS4	0.498156	0.851213	-0.997	-0.631	-0.776	0.171	-0.694	-0.253	0.06	0.414	-0.8455	-0.442	-0.358	0.2925	1
YBR034C	HMT1	0.517813	-0.199067	0.313	0.216	0.348	0.686	-0.003	-0.085	-0.163	-0.102	0.155	0.0655	0.0925	0.292	1
YBR280C	SAF1	0.311713	0.046881	0.029	0.157	-0.042	0.583	0.177	0.025	-0.145	0.001	0.103	0.091	-0.0935	0.292	1
YKL190W	CNB1	0.133627	0.970773	-0.108	-0.054	0.379	0.377	-0.116	0	0.181	0.206	-0.112	-0.027	0.28	0.2915	1
YPL009C	YPL009C	0.263873	0.019657	-0.041	0.077	0.187	0.547	0.046	-0.008	0.238	0.036	0.0025	0.0345	0.2125	0.2915	1
YPR189W	SKI3	0.810407	-0.970709	0.229	-0.013	0.077	-0.491	0.2	0.4	0.157	1.074	0.2145	0.1935	0.117	0.2915	1
YOR190W	SPR1	0.297231	-0.580646	0.199	0.035	0.274	0.019	0.038	0.208	0.234	0.563	0.1185	0.1215	0.254	0.291	1
YDR030C	RAD28	0.11505	0.58826	0.162	0.194	0.36	0.205	0.046	0.101	0.32	0.376	0.104	0.1475	0.34	0.2905	1
YIL066C	RNR3	0.241252	0.279032	0.037	-0.031	-0.028	0.522	0.04	-0.079	0.099	0.059	0.0385	-0.055	0.0355	0.2905	1
YOL093W	TRM10	1.56035	0.528039	-0.296	-0.314	0.724	-0.667	-0.253	1.645	2.218	1.248	-0.2745	0.6655	1.471	0.2905	0
YFL042C	YFL042C	0.197728	0.6741	0.05	-0.002	0.251	0.473	0.097	0.028	0.112	0.107	0.0735	0.013	0.1815	0.29	1
YFL034C-A	RPL22B	0.177103	0.483933	0.141	0.127	0.208	0.427	0.12	0.067	-0.006	0.152	0.1305	0.097	0.101	0.2895	1
YGR213C	RTA1	0.14457	0.71884	0.008	0.097	0.403	0.417	0.037	0.182	0.303	0.161	0.0225	0.1395	0.353	0.289	1
YAR028W	YAR028W	0.264627	-0.150396	0.082	-0.146	-0.05	0.489	0.254	0.104	0.115	0.088	0.168	-0.021	0.0325	0.2885	1
YIL056W	VHR1	0.1263	0.655122	0.172	0.102	0.066	0.293	-0.049	-0.016	0.097	0.284	0.0615	0.043	0.0815	0.2885	1
YDR371W	CTS2	0.406949	-0.699841	0.074	-0.006	0.039	-0.065	0.017	0.095	0.427	0.641	0.0455	0.0445	0.233	0.288	1
YKL198C	PTK1	0.204772	-0.036569	0.04	0.248	0.252	0.471	0.115	0.177	0.404	0.105	0.0775	0.2125	0.328	0.288	1
YNL235C	YNL235C	0.439658	-0.085197	-0.497	-0.008	-0.048	0.509	0.077	0.126	0.432	0.067	-0.21	0.059	0.192	0.288	1
YOR283W	YOR283W	0.432614	-0.483319	0.468	0.483	0.455	0.427	0.088	-0.001	-0.086	0.149	0.278	0.241	0.1845	0.288	1
YDR273W	DON1	0.401347	0.724366	0.002	-0.505	-0.3	0.045	0.105	0.005	0.072	0.53	0.0535	-0.25	-0.114	0.2875	1
YER131W	RPS26B	0.732939	-0.007229	-0.565	0.133	1.166	0.39	-0.111	-0.215	-0.168	0.185	-0.338	-0.041	0.499	0.2875	1
YNR073C	YNR073C	0.200762	-0.487138	0.192	0.357	0.309	0.172	0.132	0.035	0.333	0.403	0.162	0.196	0.321	0.2875	1
YML057W	CMP2	0.534012	-0.585509	-0.036	-0.096	0.382	0.801	0.149	-0.017	0.189	-0.23	0.0565	-0.0565	0.2855	0.2855	1
YGL017W	ATE1	0.152478	0.621645	0.04	0.202	0.12	0.272	-0.053	-0.086	0.093	0.298	-0.0065	0.058	0.1065	0.285	1
YHR021W-A	ECM12	0.187156	-0.437154	0.088	0.151	0.143	0.1	0.116	0.127	0.1	0.47	0.102	0.139	0.1215	0.285	1
YIL149C	MLP2	0.261833	-0.105612	0.1	0.43	0.189	0.465	0.111	0.071	0.064	0.105	0.1055	0.2505	0.1265	0.285	1
YAR031W	PRM9	0.406368	-0.389359	0.003	-0.066	-0.009	0.663	0.251	0.032	-0.137	-0.094	0.127	-0.017	-0.073	0.2845	1
YNL121C	TOM70	0.310244	0.186054	0.156	0.252	0.268	0.213	-0.212	-0.161	0.026	0.356	-0.028	0.0455	0.147	0.2845	1
YFL020C	PAU5	0.211225	0.551663	-0.168	0.206	0.354	0.334	-0.008	-0.034	0.062	0.234	-0.088	0.086	0.208	0.284	1
YER085C	YER085C	0.202605	0.746915	0.055	0.037	-0.003	0.438	0.056	-0.075	-0.24	0.129	0.0555	-0.019	-0.1215	0.2835	1
YJL058C	BIT61	0.17255	0.900337	0.139	0.18	0.445	0.369	0.089	0.056	0.178	0.196	0.114	0.118	0.3115	0.2825	1
YKR056W	TRM2	0.223054	0.528653	0.112	-0.111	0.332	0.365	0.033	-0.072	-0.073	0.2	0.0725	-0.0915	0.1295	0.2825	1
YNL156C	NSG2	0.146604	0.478354	0.151	0.095	0.306	0.423	0.068	0.106	0.306	0.142	0.1095	0.1005	0.306	0.2825	1
YKL215C	YKL215C	0.142437	0.953956	0.091	0.126	0.29	0.192	0.009	0.049	0.48	0.372	0.05	0.0875	0.385	0.282	1
YMR194C-A	YMR194C-A	0.405241	0.519501	-0.112	0.126	-0.049	0.599	-0.159	-0.353	-0.193	-0.037	-0.1355	-0.1135	-0.121	0.281	1
YMR254C	YMR254C	0.581186	-0.849945	0.079	0.108	0.112	0.842	0.03	-0.032	-0.153	-0.28	0.0545	0.038	-0.0205	0.281	1
YCR021C	HSP30	0.629674	-0.571944	0.096	0.155	-0.382	-0.241	0.192	0.172	0.317	0.802	0.144	0.1635	-0.0325	0.2805	1
YGR011W	YGR011W	0.109092	0.725691	0.085	0.181	0.434	0.271	0.114	0.05	0.263	0.29	0.0995	0.1155	0.3485	0.2805	1
YFL011W	HXT10	0.485844	-0.869657	0.156	0.07	0.122	0.763	0.164	0.036	0.023	-0.203	0.16	0.053	0.0725	0.28	1
YLR017W	MEU1	0.849386	-0.614453	0.019	0.441	0.004	1.081	-0.054	-0.017	-0.319	-0.521	-0.0175	0.212	-0.1575	0.28	1
YGL259W	YPS5	0.177021	-0.079317	0.146	0.145	0.302	0.175	-0.03	0.137	0.077	0.384	0.058	0.141	0.1895	0.2795	1
YMR066W	SOV1	2.09965	0.632856	-0.112	0.291	1.842	1.495	-1.536	-0.936	-1.02	-0.936	-0.824	-0.3225	0.411	0.2795	0
YMR152W	YIM1	0.728879	-0.401228	0.012	-0.822	0.806	0.634	0.426	0.159	0.108	-0.076	0.219	-0.3315	0.457	0.279	1
YGR256W	GND2	0.072436	0.845281	0.069	0.136	0.041	0.225	0.098	0.043	0.034	0.332	0.0835	0.0895	0.0375	0.2785	1
YER158C	YER158C	0.110763	0.87219	0.056	-0.036	0.06	0.303	0.118	0.117	0.199	0.253	0.087	0.0405	0.1295	0.278	1
YPL185W	YPL185W	0.234909	-0.944696	0.083	0.273	0.28	0.48	0.171	0.105	0.136	0.075	0.127	0.189	0.208	0.2775	1
YER038W-A	FMP49	0.447251	-0.023573	-0.197	-0.037	-0.281	-0.081	0.141	-0.296	0.047	0.634	-0.028	-0.1665	-0.117	0.2765	1
YGL163C	RAD54	0.436238	0.980868	-0.094	0.228	-0.717	0.501	-0.48	-0.359	-0.974	0.052	-0.287	-0.0655	-0.8455	0.2765	1
YCR088W	ABP1	0.223222	-0.560409	0.215	0.137	0.445	0.221	0.087	0.176	0.033	0.329	0.151	0.1565	0.239	0.275	1
YDR289C	RTT103	0.553804	0.386179	0.213	0.41	0.426	0.446	-0.25	-0.513	0.633	0.103	-0.0185	-0.0515	0.5295	0.2745	1
YKL197C	PEX1	0.428574	0.898303	-0.016	-0.263	0.158	0.63	-0.203	-0.345	-0.275	-0.081	-0.1095	-0.304	-0.0585	0.2745	1
YPR117W	YPR117W	0.68555	0.053773	0.087	-0.65	0.225	-0.254	0.252	0.194	0.377	0.803	0.1695	-0.228	0.301	0.2745	1
YDL231C	BRE4	0.241531	0.446543	-0.213	-0.018	0.109	0.49	-0.001	0.016	0.134	0.058	-0.107	-0.001	0.1215	0.274	1
YDR031W	MIC14	0.489601	-0.697756	0.117	0.258	0.623	0.522	0.022	0.079	-0.196	0.025	0.0695	0.1685	0.2135	0.2735	1
YBR072W	HSP26	0.189016	0.650807	-0.18	-0.171	0.059	0.132	-0.128	-0.125	-0.183	0.414	-0.154	-0.148	-0.062	0.273	1
YPR059C	YPR059C	0.29318	0.981813	0.088	-0.672	0.152	0.343	0.071	-0.104	0.12	0.202	0.0795	-0.388	0.136	0.2725	1
YGR283C	YGR283C	0.142619	0.864965	-0.001	-0.074	0.164	0.372	0.028	-0.16	-0.018	0.172	0.0135	-0.117	0.073	0.272	1
YHR162W	YHR162W	0.566918	-0.094289	0.358	0.18	0.21	0.726	-0.08	-0.254	-0.068	-0.184	0.139	-0.037	0.071	0.271	1
YDR471W	RPL27B	1.02721	0.357013	0.971	1.389	0.603	0.63	-0.048	-0.084	-0.101	-0.089	0.4615	0.6525	0.251	0.2705	1
YOL109W	ZEO1	0.136166	0.815719	-0.237	-0.065	0.112	0.375	-0.149	-0.001	0.247	0.165	-0.193	-0.033	0.1795	0.27	1
YPR053C	YPR053C	0.220887	0.509553	-0.012	0.22	0.143	0.297	-0.182	0.088	0.525	0.243	-0.097	0.154	0.334	0.27	1
YFR022W	ROG3	0.195611	0.843908	0.174	0.018	0.135	0.422	0.034	-0.017	-0.063	0.117	0.104	0.0005	0.036	0.2695	1
YOR253W	NAT5	0.268007	0.505302	0.146	0.096	0.029	0.336	-0.325	-0.122	0.013	0.203	-0.0895	-0.013	0.021	0.2695	1
YPR063C	YPR063C	0.12521	0.418198	0.103	0.322	0.385	0.181	0.061	0.169	0.304	0.357	0.082	0.2455	0.3445	0.269	1
YBR023C	CHS3	0.678563	0.697787	0.172	0.198	0.235	0.699	-0.288	-0.368	-0.519	-0.162	-0.058	-0.085	-0.142	0.2685	1
YPR001W	CIT3	0.725819	0.2823	0.093	0.124	0.121	0.699	-0.039	-0.261	-0.973	-0.164	0.027	-0.0685	-0.426	0.2675	1
YKL156W	RPS27A	0.27414	0.358745	-0.108	0.04	0.063	0.002	-0.069	0.008	0.198	0.531	-0.0885	0.024	0.1305	0.2665	1
YJR049C	UTR1	2.14929	-0.015271	1.553	0.881	0.21	1.983	-0.25	-0.217	-1.283	-1.451	0.6515	0.332	-0.5365	0.266	0
YOL056W	GPM3	0.322207	-0.700208	0.005	0.373	0.258	0.491	0.099	-0.002	0.01	0.039	0.052	0.1855	0.134	0.265	1
YGR230W	BNS1	0.289098	0.216518	0.13	0.048	0.326	0.44	0.209	-0.16	-0.076	0.089	0.1695	-0.056	0.125	0.2645	1
YOR011W	AUS1	0.111838	0.886415	-0.046	0.09	0.312	0.316	0.008	0.095	0.121	0.213	-0.019	0.0925	0.2165	0.2645	1
YLR437C	YLR437C	0.239565	-0.319394	0.167	0.12	0.128	0.488	0.066	0.01	0.209	0.04	0.1165	0.065	0.1685	0.264	1
YCR011C	ADP1	1.08129	-0.422403	0.347	0.305	1.286	1.044	0.125	-0.209	-0.102	-0.517	0.236	0.048	0.592	0.2635	1
YBR232C	YBR232C	0.176512	0.364206	-0.06	0.163	0.244	0.434	0.016	0.188	0.268	0.091	-0.022	0.1755	0.256	0.2625	1
YDL204W	RTN2	0.329861	0.976407	0.147	0.257	0.54	0.457	0.005	0.039	0.075	0.068	0.076	0.148	0.3075	0.2625	1
YLL017W	YLL017W	0.294217	0.128408	0.095	0.074	0.271	0.535	0.014	-0.048	0.111	-0.012	0.0545	0.013	0.191	0.2615	1
YNL050C	YNL050C	0.160348	0.17112	0.088	0.234	0.167	0.253	0.062	0.059	0.434	0.269	0.075	0.1465	0.3005	0.261	1
YPR078C	YPR078C	0.218736	0.777941	0.163	0.218	0.537	0.336	0.083	-0.004	0.201	0.185	0.123	0.107	0.369	0.2605	1
YDR033W	MRH1	0.306681	-0.30093	-0.012	0.013	0.118	0.552	0.086	-0.071	-0.018	-0.032	0.037	-0.029	0.05	0.26	1
YER184C	YER184C	0.082792	0.807392	0.189	0.055	0.304	0.283	0.064	0.084	0.21	0.237	0.1265	0.0695	0.257	0.26	1
YKL015W	PUT3	0.10923	0.755192	0.081	0.204	0.157	0.209	-0.06	0.096	0.233	0.311	0.0105	0.15	0.195	0.26	1
YLR213C	CRR1	0.147765	0.271233	0.006	0.118	-0.071	0.325	0.056	0.028	0.172	0.192	0.031	0.073	0.0505	0.2585	1
YOL092W	YOL092W	0.302514	0.063148	-0.101	0.093	0.205	-0.036	0.002	0.18	0.236	0.553	-0.0495	0.1365	0.2205	0.2585	1
YOR053W	YOR053W	0.144356	0.725054	0.106	-0.145	-0.002	0.372	0.005	-0.06	0.118	0.145	0.0555	-0.1025	0.058	0.2585	1
YDL238C	GUD1	0.201158	0.561801	0.181	-0.071	0.58	0.171	0.08	0.239	0.421	0.345	0.1305	0.084	0.5005	0.258	1
YFR011C	YFR011C	0.230537	0.423611	-0.02	0.171	0.141	0.463	-0.069	-0.034	0.133	0.053	-0.0445	0.0685	0.137	0.258	1
YIL073C	SPO22	3.32835	-0.140482	-1.853	-2.824	-1.5	-2.398	-2.184	0.01	1.322	2.913	-2.0185	-1.407	-0.089	0.2575	0
YLR343W	GAS2	0.366409	-0.888661	0.096	0.235	-0.304	0.44	0.073	0.107	0.318	0.075	0.0845	0.171	0.007	0.2575	1
YDR085C	AFR1	0.483715	0.444983	-0.05	-0.701	-0.703	0.198	-0.165	-0.254	0.139	0.316	-0.1075	-0.4775	-0.282	0.257	1
YHL022C	SPO11	0.518526	-0.512896	0.491	0.211	0.468	0.248	-0.009	-0.093	-0.388	0.266	0.241	0.059	0.04	0.257	1
YMR204C	INP1	0.358791	0.133148	0.181	0.222	0.378	0.547	0.014	-0.085	0.143	-0.034	0.0975	0.0685	0.2605	0.2565	1
YGR254W	ENO1	0.283156	-0.424244	0.246	0.284	0.286	0.473	0.155	0.09	-0.008	0.039	0.2005	0.187	0.139	0.256	1
YCR014C	POL4	0.243152	0.025483	0.013	0.294	0.394	0.115	-0.016	-0.057	0.211	0.396	-0.0015	0.1185	0.3025	0.2555	1
YLL025W	PAU17	0.354059	0.226567	0.338	0.425	0.692	0.524	0.241	0.161	0.326	-0.013	0.2895	0.293	0.509	0.2555	1
YER176W	ECM32	0.103978	0.698334	0.101	0.014	0.312	0.282	0.124	0.204	0.371	0.226	0.1125	0.109	0.3415	0.254	1
YKL220C	FRE2	0.165772	-0.50792	0.203	0.224	0.173	0.203	-0.004	0.219	0.411	0.305	0.0995	0.2215	0.292	0.254	1
YBR238C	YBR238C	0.165815	0.875829	0.177	0.194	0.218	0.253	0.004	-0.001	0.013	0.253	0.0905	0.0965	0.1155	0.253	1
YMR238W	DFG5	0.313916	-0.59503	0.099	0.307	0.359	0.157	0.102	0.196	-0.229	0.347	0.1005	0.2515	0.065	0.252	1
YGL242C	YGL242C	0.606283	-0.344376	0.107	-0.447	-0.128	-0.155	-0.563	-0.053	0.325	0.658	-0.228	-0.25	0.0985	0.2515	1
YER031C	YPT31	0.320345	0.276605	-0.152	0.341	-0.259	0.161	-0.264	-0.261	-0.203	0.341	-0.208	0.04	-0.231	0.251	1
YDR216W	ADR1	2.68782	-0.390573	-0.068	-2.231	-0.593	-1.501	0.265	1.086	1.758	2	0.0985	-0.5725	0.5825	0.2495	0
YBR105C	VID24	0.267332	0.931655	-0.328	0.117	-0.507	0.226	-0.02	0.094	-0.073	0.272	-0.174	0.1055	-0.29	0.249	1
YKR058W	GLG1	0.185252	-0.215506	0.19	0.298	0.3	0.218	0.058	-0.024	0.189	0.28	0.124	0.137	0.2445	0.249	1
YLR413W	YLR413W	0.350429	0.565165	0.044	-0.504	0.017	0.068	0.149	0.076	0.133	0.429	0.0965	-0.214	0.075	0.2485	1
YKR042W	UTH1	1.12726	-0.417394	-0.69	-0.56	-0.571	-0.643	0.264	0.039	0.228	1.139	-0.213	-0.2605	-0.1715	0.248	1
YNL203C	YNL203C	0.64903	-0.529471	-0.019	0.543	-0.901	0.405	-0.058	0.147	0.294	0.091	-0.0385	0.345	-0.3035	0.248	1
YPL257W	YPL257W	0.245221	0.991626	0.243	0.166	0.192	0.372	0.013	-0.077	-0.067	0.124	0.128	0.0445	0.0625	0.248	1
YPL034W	YPL034W	0.25326	0.082748	0.115	0.184	-0.069	0.445	0.013	-0.098	0.034	0.05	0.064	0.043	-0.0175	0.2475	1
YDL131W	LYS21	0.63633	-0.787151	0.063	-0.042	-0.374	-0.14	0.115	0.327	0.565	0.634	0.089	0.1425	0.0955	0.247	1
YER132C	PMD1	0.069782	0.545286	0.172	0.331	0.31	0.186	0.223	0.343	0.267	0.308	0.1975	0.337	0.2885	0.247	1
YKL084W	HOT13	0.155485	0.808261	-0.018	0.029	0.209	0.138	0.097	0.206	0.277	0.356	0.0395	0.1175	0.243	0.247	1
YDL089W	YDL089W	0.315474	0.226907	-0.212	0.007	0.133	0.507	-0.019	-0.174	-0.105	-0.014	-0.1155	-0.0835	0.014	0.2465	1
YMR190C	SGS1	0.463854	-0.405208	-0.016	-0.004	-0.236	-0.213	0.011	-0.057	-0.124	0.706	-0.0025	-0.0305	-0.18	0.2465	1
YGL256W	ADH4	0.127089	0.980273	0.187	0.182	0.394	0.318	0.111	0.076	0.231	0.173	0.149	0.129	0.3125	0.2455	1
YNL120C	YNL120C	1.83133	-0.414583	0.99	1.452	1.717	1.06	0.351	0.889	-1.451	-0.569	0.6705	1.1705	0.133	0.2455	0
YOR227W	YOR227W	0.193687	0.660016	-0.02	0.378	0.261	0.281	-0.155	0.023	0.236	0.209	-0.0875	0.2005	0.2485	0.245	1
YDR154C	YDR154C	0.098619	0.956918	-0.023	-0.148	0.031	0.342	-0.036	-0.126	0.046	0.147	-0.0295	-0.137	0.0385	0.2445	1
YIR024C	YIR024C	0.231835	-0.081548	0.102	0.131	0.291	0.034	0.254	0.22	0.373	0.455	0.178	0.1755	0.332	0.2445	1
YDR481C	PHO8	0.316625	-0.327121	0.189	0.124	0.498	0.014	-0.069	0.043	0.157	0.474	0.06	0.0835	0.3275	0.244	1
YDR506C	YDR506C	0.154575	0.947751	0.014	0.274	0.32	0.355	0.033	0.126	0.165	0.133	0.0235	0.2	0.2425	0.244	1
YGL003C	CDH1	2.99889	0.322298	1.732	1.372	3.335	2.547	-0.17	-0.783	0.788	-2.06	0.781	0.2945	2.0615	0.2435	0
YML075C	HMG1	0.377299	0.643287	-0.088	0.028	0.358	0.483	-0.174	-0.158	-0.187	0.003	-0.131	-0.065	0.0855	0.243	1
YDR142C	PEX7	0.234454	0.1569	-0.059	-0.251	0.17	0.271	0.165	-0.024	-0.169	0.214	0.053	-0.1375	0.0005	0.2425	1
YJL132W	YJL132W	0.145907	0.9266	-0.052	0.129	-0.061	0.364	-0.171	0.02	-0.069	0.121	-0.1115	0.0745	-0.065	0.2425	1
YMR018W	YMR018W	0.256151	0.357267	-0.024	-0.073	0.277	0.062	0.249	0.167	0.279	0.423	0.1125	0.047	0.278	0.2425	1
YJL055W	YJL055W	0.442429	-0.648662	0.275	0.201	-0.24	0.647	0.099	0.142	0.064	-0.163	0.187	0.1715	-0.088	0.242	1
YMR010W	YMR010W	0.742566	-0.258549	-0.063	-0.498	-0.454	0.063	0.348	0.301	0.673	0.421	0.1425	-0.0985	0.1095	0.242	1
YGR149W	YGR149W	0.413763	-0.834895	0.1	-0.198	0.549	0.495	0.203	0.147	0.003	-0.012	0.1515	-0.0255	0.276	0.2415	1
YAL065C	YAL065C	0.333596	-0.347852	0.152	-0.066	-0.144	0.553	0.246	0.072	0.023	-0.071	0.199	0.003	-0.0605	0.241	1
YNR064C	YNR064C	0.188747	-0.291072	0.063	-0.044	0.309	0.294	0.149	0.122	-0.001	0.187	0.106	0.039	0.154	0.2405	1
YPL026C	SKS1	0.230701	-0.054118	0.289	-0.066	0.075	0.394	0.274	0.255	-0.049	0.087	0.2815	0.0945	0.013	0.2405	1
YOR233W	KIN4	0.187239	0.055022	0.112	0.22	0.247	0.353	0.137	0.238	0.544	0.127	0.1245	0.229	0.3955	0.24	1
YDR400W	URH1	0.277185	-0.877116	0.064	0.03	-0.026	0.513	0.085	0.084	0.043	-0.034	0.0745	0.057	0.0085	0.2395	1
YHL006C	SHU1	0.342607	0.665514	-0.605	-0.31	-0.344	0.506	-0.305	-0.008	-0.279	-0.027	-0.455	-0.159	-0.3115	0.2395	1
YKL177W	YKL177W	0.167452	0.236384	0.074	0.143	0.188	0.4	0.046	0.063	0.144	0.079	0.06	0.103	0.166	0.2395	1
YNL023C	FAP1	0.215108	0.783419	0.089	0.113	0.42	0.337	-0.058	0.031	0.076	0.141	0.0155	0.072	0.248	0.239	1
YKR036C	CAF4	0.304156	-0.208323	-0.039	-0.195	0.122	0.032	-0.098	0.192	-0.093	0.445	-0.0685	-0.0015	0.0145	0.2385	1
YMR139W	RIM11	0.926041	0.933382	-0.512	-0.415	0.147	-0.203	0.291	0.66	1.069	0.68	-0.1105	0.1225	0.608	0.2385	1
YCL064C	CHA1	0.425491	0.377873	-0.326	-0.329	-0.704	0.253	-0.236	-0.073	0.102	0.223	-0.281	-0.201	-0.301	0.238	1
YMR186W	HSC82	0.190361	0.708697	-0.09	-0.137	-0.323	0.219	-0.07	-0.034	0.041	0.257	-0.08	-0.0855	-0.141	0.238	1
YPR129W	SCD6	0.341451	-0.213689	0.136	0.025	-0.128	0.574	0.028	0.08	-0.119	-0.098	0.082	0.0525	-0.1235	0.238	1
YNL228W	YNL228W	0.770078	-0.404263	-0.439	-0.534	0.018	0.076	0.876	0.196	-0.057	0.399	0.2185	-0.169	-0.0195	0.2375	1
YOR289W	YOR289W	0.060768	0.792204	0.1	0.041	0.035	0.206	0.013	0.088	0.067	0.269	0.0565	0.0645	0.051	0.2375	1
YCR020C	PET18	0.566041	-0.092832	0.057	0.447	0.432	0.552	-0.123	-0.258	-0.163	-0.079	-0.033	0.0945	0.1345	0.2365	1
YJL131C	YJL131C	0.589324	-0.277205	-0.107	-0.013	-0.535	-0.15	-0.106	0.176	0.338	0.619	-0.1065	0.0815	-0.0985	0.2345	1
YLL012W	YEH1	0.139789	0.859069	-0.012	0.036	0.144	0.331	-0.105	0.021	-0.035	0.138	-0.0585	0.0285	0.0545	0.2345	1
YDR430C	CYM1	0.229365	0.970371	-0.175	-0.326	-0.292	0.43	-0.153	-0.139	-0.146	0.038	-0.164	-0.2325	-0.219	0.234	1
YJR092W	BUD4	0.312748	-0.395974	0.01	0.116	0.367	0.533	0.102	0.087	0.211	-0.065	0.056	0.1015	0.289	0.234	1
YKL007W	CAP1	0.155897	0.984478	-0.038	-0.053	-0.865	0.199	0.129	-0.046	-0.611	0.268	0.0455	-0.0495	-0.738	0.2335	1
YMR283C	RIT1	0.223048	-0.752467	0.028	0.053	0.109	0.455	0.035	0.073	0.061	0.012	0.0315	0.063	0.085	0.2335	1
YMR226C	TMA29	0.115049	0.659203	0.024	0.104	-0.044	0.316	0.117	-0.022	-0.058	0.148	0.0705	0.041	-0.051	0.232	1
YER179W	DMC1	0.067415	0.829257	0.128	0.102	0.377	0.167	0.103	0.123	0.35	0.295	0.1155	0.1125	0.3635	0.231	1
YLR050C	YLR050C	1.2964	-0.752315	0.024	-0.09	1.201	1.026	-0.555	-0.534	-0.711	-0.566	-0.2655	-0.312	0.245	0.23	0
YOL100W	PKH2	2.16829	0.598371	-0.101	0.295	2.014	1.327	-1.204	-1.476	-1.09	-0.868	-0.6525	-0.5905	0.462	0.2295	0
YHR132C	ECM14	0.281395	0.952471	-0.352	-0.099	0.396	0.428	-0.345	-0.348	0.087	0.029	-0.3485	-0.2235	0.2415	0.2285	1
YJR021C	REC107	0.318674	0.67915	-0.096	0.369	0.209	0.453	-0.023	-0.02	-0.01	0.004	-0.0595	0.1745	0.0995	0.2285	1
YBR261C	YBR261C	0.203052	-0.847223	0.171	0.251	0.324	0.073	0.117	0.139	0.093	0.383	0.144	0.195	0.2085	0.228	1
YKL138C	MRPL31	0.600502	0.960845	-0.228	-0.051	0.121	0.609	-0.728	-0.661	-0.367	-0.154	-0.478	-0.356	-0.123	0.2275	1
YLR351C	NIT3	0.546486	-0.275889	0.369	0.327	-0.422	0.697	0.028	0.051	-0.075	-0.242	0.1985	0.189	-0.2485	0.2275	1
YMR138W	CIN4	0.22042	0.543387	-0.086	0.045	-0.129	0.416	0.029	0.014	-0.324	0.039	-0.0285	0.0295	-0.2265	0.2275	1
YNL215W	IES2	0.710559	0.247465	-0.946	-0.277	-0.5	0.18	-0.421	-0.707	0.745	0.275	-0.6835	-0.492	0.1225	0.2275	1
YGR152C	RSR1	0.151356	0.403666	0.195	0.17	0.314	0.356	0.056	0.12	0.257	0.098	0.1255	0.145	0.2855	0.227	1
YDR001C	NTH1	0.276949	0.518169	0.017	-0.295	-0.219	0.464	-0.14	-0.168	-0.018	-0.011	-0.0615	-0.2315	-0.1185	0.2265	1
YKL168C	KKQ8	0.803045	0.512721	0.048	-1.449	-0.629	0.125	-0.051	-0.185	0.336	0.327	-0.0015	-0.817	-0.1465	0.226	1
YHL007C	STE20	0.484954	0.862153	-1.209	0.13	0.318	0.664	-1.269	0.193	-0.087	-0.213	-1.239	0.1615	0.1155	0.2255	1
YKL005C	BYE1	0.60108	-0.606948	0.138	0.351	0.579	0.783	0.121	0.065	0.236	-0.333	0.1295	0.208	0.4075	0.225	1
YHR104W	GRE3	0.364963	-0.20365	0.23	0.157	0.216	0.525	0.052	-0.078	-0.075	-0.076	0.141	0.0395	0.0705	0.2245	1
YAR020C	PAU7	0.348634	0.013664	0.096	-0.238	-0.085	0.523	0.207	0.041	-0.281	-0.075	0.1515	-0.0985	-0.183	0.224	1
YDR202C	RAV2	1.2643	-0.654097	-0.034	-0.64	-0.475	-0.627	0.204	0.466	1.014	1.075	0.085	-0.087	0.2695	0.224	0
YLR172C	DPH5	0.459798	-0.401696	0.055	-0.031	-0.224	-0.157	0.144	0.256	0.194	0.605	0.0995	0.1125	-0.015	0.224	1
YOR356W	YOR356W	0.295648	-0.672726	0.174	0.372	0.302	0.155	-0.025	-0.063	-0.017	0.293	0.0745	0.1545	0.1425	0.224	1
YOL098C	YOL098C	0.335863	0.673778	-0.02	0.118	0.034	0.402	-0.11	-0.294	-0.348	0.045	-0.065	-0.088	-0.157	0.2235	1
YGL198W	YIP4	0.352622	0.246577	0.084	-0.561	0.015	0.41	0.15	-0.073	-0.323	0.035	0.117	-0.317	-0.154	0.2225	1
YLL054C	YLL054C	0.468074	-0.914284	-0.012	-0.041	0.006	0.598	0.26	0.221	0.418	-0.153	0.124	0.09	0.212	0.2225	1
YGR199W	PMT6	0.125385	0.992251	0.009	-0.119	0.268	0.3	0.045	-0.004	0.114	0.143	0.027	-0.0615	0.191	0.2215	1
YIR030C	DCG1	0.184091	0.35822	0.191	0.009	0.253	0.256	0.165	-0.055	-0.102	0.187	0.178	-0.023	0.0755	0.2215	1
YMR206W	YMR206W	0.216874	-0.056286	0.069	-0.023	0.077	0.014	0.095	0.057	0.171	0.429	0.082	0.017	0.124	0.2215	1
YDR092W	UBC13	1.32997	-0.132864	-0.224	-1.089	-1.065	-0.54	-0.086	-0.158	0.903	0.982	-0.155	-0.6235	-0.081	0.221	0
YGL002W	ERP6	0.27099	0.321425	0.229	0	0.105	0.404	-0.104	-0.208	0.175	0.037	0.0625	-0.104	0.14	0.2205	1
YKR100C	SKG1	0.304357	0.077123	-0.086	0.127	0.01	0.439	-0.138	-0.264	0.162	0.001	-0.112	-0.0685	0.086	0.22	1
YOL090W	MSH2	1.52379	-0.045933	-1.886	0.028	0.952	1.537	-0.365	0.106	0.778	-1.097	-1.1255	0.067	0.865	0.22	0
YGR221C	TOS2	0.295689	-0.759501	0.079	0.098	0.368	-0.019	0.101	0.111	0.018	0.457	0.09	0.1045	0.193	0.219	1
YJL181W	YJL181W	0.211463	0.439526	-0.002	-0.051	-0.073	0.129	0.014	0.292	0.096	0.309	0.006	0.1205	0.0115	0.219	1
YOR018W	ROD1	0.077397	0.838096	0.039	-0.055	0.22	0.251	0.114	-0.027	0.104	0.187	0.0765	-0.041	0.162	0.219	1
YLR346C	YLR346C	0.127037	0.690383	0.087	0.142	0.191	0.221	0.031	-0.086	0.094	0.216	0.059	0.028	0.1425	0.2185	1
YJL175W	YJL175W	1.15901	-0.114727	0.053	0.294	1.49	0.789	-0.033	-0.625	-0.303	-0.354	0.01	-0.1655	0.5935	0.2175	1
YCR102W-A	YCR102W-A	0.845754	-0.764068	0.29	0.383	1.433	0.425	-0.051	0.093	-0.144	0.008	0.1195	0.238	0.6445	0.2165	1
YLR189C	ATG26	0.153612	0.346253	0.078	0.086	0.326	0.306	0.042	0.118	0.081	0.127	0.06	0.102	0.2035	0.2165	1
YLR371W	ROM2	1.36648	0.384299	0.641	0.565	0.193	0.9	-0.719	-1.133	-0.737	-0.468	-0.039	-0.284	-0.272	0.216	0
YNL307C	MCK1	0.524927	0.550714	-1.084	-0.315	0.088	-0.075	-0.233	-0.488	0.196	0.505	-0.6585	-0.4015	0.142	0.215	1
YPR091C	YPR091C	0.199323	0.819384	-0.053	-0.025	-0.075	0.309	-0.11	-0.115	-0.41	0.121	-0.0815	-0.07	-0.2425	0.215	1
YIR019C	MUC1	0.037487	0.798169	0.213	0.291	0.268	0.21	0.213	0.283	0.342	0.219	0.213	0.287	0.305	0.2145	1
YMR180C	CTL1	0.243497	-0.755133	0.069	0.088	0.215	0.427	0.096	0.16	-0.01	0.002	0.0825	0.124	0.1025	0.2145	1
YMR278W	YMR278W	0.102706	0.519506	0.051	-0.025	0.146	0.266	0.087	0.116	0.247	0.162	0.069	0.0455	0.1965	0.214	1
YLR034C	SMF3	0.166408	0.197056	0.059	0.118	0.112	0.305	-0.042	-0.012	0.336	0.122	0.0085	0.053	0.224	0.2135	1
YPL220W	RPL1A	0.161985	-0.026559	0.089	0.268	0.351	0.097	0.065	0.073	0.235	0.327	0.077	0.1705	0.293	0.212	1
YKR051W	YKR051W	0.29523	-0.563453	0.141	0.085	-0.071	0.495	0.207	0.184	0.043	-0.072	0.174	0.1345	-0.014	0.2115	1
YLL051C	FRE6	0.938823	-0.536184	0.133	0.258	1.299	0.781	0.05	-0.104	-0.146	-0.359	0.0915	0.077	0.5765	0.211	1
YGR205W	YGR205W	0.126542	0.758847	0.01	-0.173	0.127	0.116	-0.027	-0.014	0.168	0.305	-0.0085	-0.0935	0.1475	0.2105	1
YER075C	PTP3	0.410939	-0.459675	0.3	0.258	0.486	-0.195	0.172	0.207	0.506	0.615	0.236	0.2325	0.496	0.21	1
YLR455W	YLR455W	0.205461	-0.779823	0.128	0.101	0.382	0.217	0.154	0.14	-0.026	0.203	0.141	0.1205	0.178	0.21	1
YDR270W	CCC2	0.668802	0.806201	-0.2	-0.492	0.196	0.547	-1.054	-0.73	-0.544	-0.128	-0.627	-0.611	-0.174	0.2095	1
YBR244W	GPX2	0.271754	-0.115616	0.094	0.089	0.174	0.386	-0.034	0.163	0.559	0.032	0.03	0.126	0.3665	0.209	1
YGL161C	YIP5	0.338072	0.02303	0.015	0.221	0.117	0.466	-0.076	-0.183	-0.026	-0.049	-0.0305	0.019	0.0455	0.2085	1
YAL029C	MYO4	0.475405	-0.704094	0.147	-0.168	-0.488	0.465	0.251	0.13	0.247	-0.049	0.199	-0.019	-0.1205	0.208	1
YLR035C	MLH2	0.196462	0.029819	-0.098	0.173	-0.015	0.075	-0.01	-0.041	0.16	0.34	-0.054	0.066	0.0725	0.2075	1
YNL009W	IDP3	0.417431	-0.848607	0.213	0.103	0.157	0.604	0.072	0.024	-0.048	-0.189	0.1425	0.0635	0.0545	0.2075	1
YKR057W	RPS21A	0.80461	-0.653762	-0.062	-0.151	-0.552	0.812	0.009	0.667	0.118	-0.399	-0.0265	0.258	-0.217	0.2065	1
YDL218W	YDL218W	0.107566	0.43249	0.077	0.026	0.188	0.101	0.05	0.029	0.15	0.311	0.0635	0.0275	0.169	0.206	1
YGR003W	CUL3	0.136117	-0.338565	0.147	0.173	0.152	0.146	-0.043	0.032	0.215	0.265	0.052	0.1025	0.1835	0.2055	1
YOL055C	THI20	0.080128	0.973365	0.027	0.005	0.376	0.23	0.063	0.101	0.263	0.181	0.045	0.053	0.3195	0.2055	1
YLR187W	SKG3	0.182703	0.377501	0.257	0.111	0.246	0.266	0.187	0.014	-0.077	0.144	0.222	0.0625	0.0845	0.205	1
YOR081C	TGL5	0.245354	-0.239633	-0.093	0.035	0.265	-0.004	0.078	0.062	0.075	0.414	-0.0075	0.0485	0.17	0.205	1
YOR132W	VPS17	1.51776	-0.900242	0.07	0.302	-0.532	-1.078	0.311	0.671	1.032	1.486	0.1905	0.4865	0.25	0.204	0
YLR040C	YLR040C	1.31946	-0.281002	-0.015	0.163	0.27	0.836	-0.343	2.272	-0.629	-0.429	-0.179	1.2175	-0.1795	0.2035	0
YLR214W	FRE1	0.136408	0.728632	-0.003	0.064	-0.053	0.098	-0.119	-0.062	-0.077	0.309	-0.061	0.001	-0.065	0.2035	1
YLR285W	NNT1	0.151873	-0.276349	0.063	0.121	0.238	0.263	0.134	0.063	-0.026	0.144	0.0985	0.092	0.106	0.2035	1
YNL035C	YNL035C	0.250297	0.607187	-0.1	0.11	-0.343	0.159	0.087	0.121	0.113	0.246	-0.0065	0.1155	-0.115	0.2025	1
YDR403W	DIT1	0.136592	0.719593	0.022	0.174	-0.026	0.301	-0.011	-0.006	0.018	0.103	0.0055	0.084	-0.004	0.202	1
YER045C	ACA1	0.261659	-0.879154	0.027	0.047	0.02	-0.054	0.007	0.056	-0.086	0.458	0.017	0.0515	-0.033	0.202	1
YKR048C	NAP1	0.215357	0.956784	0.01	-0.072	-0.549	0.377	-0.081	-0.254	-0.402	0.027	-0.0355	-0.163	-0.4755	0.202	1
YGL156W	AMS1	0.092985	0.733086	0.18	0.209	0.231	0.182	0.028	0.163	0.32	0.22	0.104	0.186	0.2755	0.201	1
YOR345C	YOR345C	0.187484	-0.25517	0.264	0.217	-0.125	0.16	0.071	0.035	0.127	0.242	0.1675	0.126	0.001	0.201	1
YGL226W	YGL226W	0.250919	-0.4111	0.01	0.264	0.046	0.053	-0.032	-0.017	0.337	0.347	-0.011	0.1235	0.1915	0.2	1
YJR128W	YJR128W	0.191391	0.927833	0.009	-0.149	-0.273	0.365	-0.041	-0.038	-0.122	0.035	-0.016	-0.0935	-0.1975	0.2	1
YIL002C	INP51	0.190342	-0.243655	0.299	0.218	0.3	0.052	0.125	0.09	0.406	0.347	0.212	0.154	0.353	0.1995	1
YLR460C	YLR460C	0.18392	0.267753	0.162	0.083	0.301	0.287	0.011	0.048	0.017	0.112	0.0865	0.0655	0.159	0.1995	1
YNL092W	YNL092W	0.160259	0.722078	0.038	0.144	0.438	0.254	0.075	0.135	0.139	0.145	0.0565	0.1395	0.2885	0.1995	1
YDL079C	MRK1	0.241498	-0.720933	0.047	0.163	0.159	0.437	0.095	0.129	0.216	-0.039	0.071	0.146	0.1875	0.199	1
YDR406W	PDR15	0.532528	0.127714	0.494	-0.624	-0.42	0.128	0.136	0.027	0.33	0.269	0.315	-0.2985	-0.045	0.1985	1
YKR104W	YKR104W	0.328868	-0.606034	0.016	0.062	0.454	0.479	0.142	0.16	0.15	-0.082	0.079	0.111	0.302	0.1985	1
YKL093W	MBR1	0.148376	0.958327	0.063	0.093	0.363	0.143	0.202	0.293	0.492	0.253	0.1325	0.193	0.4275	0.198	1
YHL035C	VMR1	0.285658	0.539366	-0.046	-0.363	-0.214	0.143	0.066	-0.024	-0.647	0.25	0.01	-0.1935	-0.4305	0.1965	1
YMR320W	YMR320W	0.069145	0.889259	0.081	-0.044	0.264	0.143	0.114	0.031	0.233	0.25	0.0975	-0.0065	0.2485	0.1965	1
YNL095C	YNL095C	0.191196	0.263104	-0.042	0.062	0.272	0.369	0.039	0.131	0.398	0.024	-0.0015	0.0965	0.335	0.1965	1
YJL065C	DLS1	0.638424	-0.363709	0.536	-0.262	0.556	0.061	0.445	0.184	-0.606	0.331	0.4905	-0.039	-0.025	0.196	1
YKL218C	SRY1	0.178178	-0.132608	0.084	0.163	0.12	0.364	0.049	0.153	0.007	0.028	0.0665	0.158	0.0635	0.196	1
YEL006W	YEA6	0.181169	0.791342	0.015	0.016	-0.307	0.299	0.223	-0.053	-0.507	0.091	0.119	-0.0185	-0.407	0.195	1
YER130C	YER130C	1.07427	-0.485507	-0.686	-0.615	-0.528	-0.711	0.001	-0.031	0.193	1.101	-0.3425	-0.323	-0.1675	0.195	1
YNL063W	MTQ1	0.182163	0.329863	0.034	0.098	0.154	0.048	0.085	0.034	0.353	0.342	0.0595	0.066	0.2535	0.195	1
YCR060W	TAH1	0.293479	0.049971	0.119	0.071	0.511	0.34	0.065	-0.018	0.012	0.049	0.092	0.0265	0.2615	0.1945	1
YGR189C	CRH1	0.304848	-0.897589	-0.02	0.106	-0.002	0.488	0.006	-0.052	0.037	-0.099	-0.007	0.027	0.0175	0.1945	1
YNL123W	NMA111	0.486631	0.002734	0.114	-0.664	0.211	0.3	0.148	-0.124	-0.57	0.089	0.131	-0.394	-0.1795	0.1945	1
YOR105W	YOR105W	0.288949	0.012792	-0.057	0.092	0.612	0.03	0.053	0.047	0.152	0.359	-0.002	0.0695	0.382	0.1945	1
YPR052C	NHP6A	0.895377	-0.401071	-0.359	-0.271	-0.896	-0.267	-0.243	0.073	0.595	0.656	-0.301	-0.099	-0.1505	0.1945	1
YAR044W	SWH1_p	0.27434	-0.72202	0.114	-0.188	0.041	0.305	0.275	0.251	0.223	0.083	0.1945	0.0315	0.132	0.194	1
YLR118C	YLR118C	0.347778	0.872005	-0.022	-0.438	0.136	0.072	0.16	-0.05	0.627	0.315	0.069	-0.244	0.3815	0.1935	1
YMR153C-A	YMR153C-A	0.124648	0.534031	0.04	0.054	0.202	0.314	0.009	0.063	0.147	0.073	0.0245	0.0585	0.1745	0.1935	1
YMR259C	YMR259C	0.399747	-0.822575	0.179	0.116	0.045	0.583	0.077	-0.019	-0.016	-0.196	0.128	0.0485	0.0145	0.1935	1
YBR241C	YBR241C	0.292926	-0.974547	0.182	0.183	0.37	0.424	0.101	0.13	0.023	-0.038	0.1415	0.1565	0.1965	0.193	1
YML056C	IMD4	0.466933	0.110774	0.106	0.121	0.133	0.437	0.2	-0.097	-0.627	-0.051	0.153	0.012	-0.247	0.193	1
YOR339C	UBC11	0.15486	-0.095459	0.009	-0.023	0.048	0.337	0.079	0.016	0.129	0.049	0.044	-0.0035	0.0885	0.193	1
YIL079C	AIR1	0.255462	0.45599	-0.116	-0.122	0.107	0.36	-0.339	-0.057	0.415	0.025	-0.2275	-0.0895	0.261	0.1925	1
YKL034W	TUL1	0.346035	-0.073052	0.162	0.258	0.301	0.211	-0.046	0.578	-0.275	0.172	0.058	0.418	0.013	0.1915	1
YML002W	YML002W	0.328231	0.245392	0.035	-0.396	-0.122	0.47	0.099	-0.115	-0.316	-0.087	0.067	-0.2555	-0.219	0.1915	1
YOL017W	ESC8	0.217583	0.512612	-0.009	0.317	0.183	0.284	-0.145	-0.051	0.148	0.099	-0.077	0.133	0.1655	0.1915	1
YDR501W	PLM2	0.388669	0.234438	0.015	0.357	0.261	0.364	-0.22	-0.291	0.164	0.018	-0.1025	0.033	0.2125	0.191	1
YKL162C-A	YKL162C-A	0.366181	-0.837702	0.081	0.121	0.303	0.481	0.064	-0.004	-0.126	-0.099	0.0725	0.0585	0.0885	0.191	1
YOR135C	IRC14	0.971881	-0.055589	0.709	-0.287	0.486	-0.661	0.572	0.381	1.126	1.043	0.6405	0.047	0.806	0.191	1
YBR207W	FTH1	0.159364	0.94994	-0.189	0.048	0.365	0.291	-0.038	0.067	0.17	0.09	-0.1135	0.0575	0.2675	0.1905	1
YDL222C	FMP45	0.433585	-0.989167	0.284	0.367	-0.042	0.506	0.023	-0.082	0.248	-0.125	0.1535	0.1425	0.103	0.1905	1
YMR025W	CSI1	0.165983	-0.802774	0.232	0.191	0.276	0.098	0.231	0.221	0.002	0.283	0.2315	0.206	0.139	0.1905	1
YBR063C	YBR063C	0.234282	-0.821216	0.035	0.118	0.134	0.408	0.109	0.009	0.024	-0.028	0.072	0.0635	0.079	0.19	1
YCR023C	YCR023C	0.197943	-0.628382	0.101	0.06	0.314	0.132	0.12	0.065	-0.064	0.248	0.1105	0.0625	0.125	0.19	1
YBL091C-A	SCS22	0.2633	-0.19087	-0.03	0.063	-0.235	0.144	-0.075	-0.238	0.185	0.235	-0.0525	-0.0875	-0.025	0.1895	1
YBR205W	KTR3	0.245833	-0.54969	-0.005	-0.001	0.137	0.042	0.053	-0.006	-0.252	0.337	0.024	-0.0035	-0.0575	0.1895	1
YDL243C	AAD4	0.320862	-0.832641	0.222	0.039	0.088	0.5	0.202	0.121	0.226	-0.121	0.212	0.08	0.157	0.1895	1
YFL010C	WWM1	0.431666	-0.591365	0.216	0.258	0.258	0.521	-0.05	-0.142	-0.011	-0.144	0.083	0.058	0.1235	0.1885	1
YGR118W	RPS23A	0.88663	-0.667178	-0.003	-0.09	-0.622	1.057	0.058	-0.028	-0.276	-0.68	0.0275	-0.059	-0.449	0.1885	1
YGR196C	FYV8	0.219374	0.495042	0.112	0.301	0.023	0.386	0.04	0.167	-0.089	-0.01	0.076	0.234	-0.033	0.188	1
YMR086W	YMR086W	0.436986	-0.794106	0.116	0.356	0.344	0.598	0.227	0.297	0.069	-0.222	0.1715	0.3265	0.2065	0.188	1
YNL101W	AVT4	0.092458	0.4994	0.084	0.004	-0.035	0.158	-0.008	-0.037	0.108	0.218	0.038	-0.0165	0.0365	0.188	1
YDR014W	RAD61	0.414667	-0.999553	-0.053	-0.01	-0.233	0.56	0.046	0.021	0.112	-0.187	-0.0035	0.0055	-0.0605	0.1865	1
YLR348C	DIC1	0.131197	0.519766	-0.06	0.068	-0.004	0.179	0.04	-0.133	-0.139	0.194	-0.01	-0.0325	-0.0715	0.1865	1
YDL199C	YDL199C	0.488946	-0.876038	0.253	0.181	0.177	0.653	0.062	-0.027	0.225	-0.282	0.1575	0.077	0.201	0.1855	1
YOL046C	YOL046C	0.156219	-0.380288	-0.088	0.113	-0.024	0.287	0.126	0.06	0.062	0.083	0.019	0.0865	0.019	0.185	1
YPL054W	LEE1	0.130473	0.793262	-0.003	-0.005	0.046	0.126	-0.027	-0.003	0.278	0.243	-0.015	-0.004	0.162	0.1845	1
YOR040W	GLO4	0.113638	0.564531	-0.048	0.011	0.022	0.258	0.097	0.068	0.096	0.11	0.0245	0.0395	0.059	0.184	1
YER118C	SHO1	0.134681	0.73416	0.1	0.001	-0.074	0.313	0.095	-0.072	-0.085	0.054	0.0975	-0.0355	-0.0795	0.1835	1
YMR269W	TMA23	0.401715	0.162884	-0.621	-0.067	-0.309	0.305	-0.128	-0.122	0.274	0.061	-0.3745	-0.0945	-0.0175	0.183	1
YFL032W	YFL032W	0.708437	-0.15786	-0.015	-0.596	-0.128	0.076	0.261	0.408	0.809	0.289	0.123	-0.094	0.3405	0.1825	1
YLR265C	NEJ1	0.307124	-0.404193	0.111	0.166	-0.293	0.435	-0.05	-0.011	-0.038	-0.07	0.0305	0.0775	-0.1655	0.1825	1
YGL019W	CKB1	1.80469	-0.187207	1.542	2.481	0.465	1.257	-0.06	0.066	0.512	-0.894	0.741	1.2735	0.4885	0.1815	0
YDR352W	YDR352W	0.434321	-0.996582	0.114	0.069	-0.156	-0.076	0.208	0.277	0.506	0.438	0.161	0.173	0.175	0.181	1
YGL251C	HFM1	0.439094	-0.235268	0.031	-0.519	0.103	0.518	0.29	-0.038	-0.033	-0.156	0.1605	-0.2785	0.035	0.181	1
YOR346W	REV1	0.179149	-0.239453	0.035	-0.02	0.011	0.294	-0.027	0.104	0.252	0.068	0.004	0.042	0.1315	0.181	1
YLR273C	PIG1	0.180864	0.692972	0.157	0.163	-0.25	0.266	0.036	-0.086	-0.092	0.095	0.0965	0.0385	-0.171	0.1805	1
YCR082W	AHC2	0.264465	0.606596	-0.001	-0.438	0.08	0.389	0.049	-0.138	-0.032	-0.029	0.024	-0.288	0.024	0.18	1
YLR432W	IMD3	0.116943	-0.492987	0.082	0.181	0.091	0.143	0.095	-0.018	0.189	0.216	0.0885	0.0815	0.14	0.1795	1
YOL088C	MPD2	0.184774	-0.138541	0.085	0.078	-0.116	0.34	0.089	-0.024	0.036	0.019	0.087	0.027	-0.04	0.1795	1
YNR008W	LRO1	0.608737	-0.985626	-0.004	0.094	0.111	0.784	0.08	-0.006	0.078	-0.426	0.038	0.044	0.0945	0.179	1
YJR034W	PET191	1.8374	-0.845992	0.894	1.542	0.21	1.204	-0.333	-1.187	-0.377	-0.847	0.2805	0.1775	-0.0835	0.1785	0
YLR104W	YLR104W	0.206535	-0.536328	0.109	-0.089	0.077	0.241	0.3	0.247	0.152	0.116	0.2045	0.079	0.1145	0.1785	1
YML074C	FPR3	0.864125	-0.886856	0.046	0.206	0.082	0.998	-0.181	-0.293	0.082	-0.641	-0.0675	-0.0435	0.082	0.1785	1
YDR215C	YDR215C	0.897415	-0.032763	-0.13	-0.76	-0.515	-0.455	0.06	0.051	0.448	0.81	-0.035	-0.3545	-0.0335	0.1775	1
YOR008C	SLG1	1.29208	-0.318435	1.014	0.72	-1.469	0.999	0.015	-0.384	-0.143	-0.645	0.5145	0.168	-0.806	0.177	0
YOR126C	IAH1	0.247207	-0.521492	0.279	0.062	0.278	0.37	0.111	0.074	0.019	-0.016	0.195	0.068	0.1485	0.177	1
YPL167C	REV3	0.257428	-0.179819	-0.168	0.126	-0.103	0.296	-0.046	0.033	0.327	0.058	-0.107	0.0795	0.112	0.177	1
YIL058W	YIL058W	0.229382	-0.293888	0.201	0.126	-0.101	0.27	-0.087	-0.11	0.09	0.082	0.057	0.008	-0.0055	0.176	1
YPR043W	RPL43A	1.6222	0.206926	1.831	0.506	0.375	1.3	0.131	0.495	-1.232	-0.948	0.981	0.5005	-0.4285	0.176	0
YPR196W	YPR196W	0.215829	0.042353	0.111	0.055	0.353	0.38	0.041	0.121	0.25	-0.028	0.076	0.088	0.3015	0.176	1
YCL048W	SPS22	0.588879	-0.325248	0.134	0.116	0.149	-0.297	0.094	0.308	0.824	0.648	0.114	0.212	0.4865	0.1755	1
YFR012W	YFR012W	0.30554	0.694614	0.08	0.124	-0.231	0.425	-0.001	0.1	-0.572	-0.075	0.0395	0.112	-0.4015	0.175	1
YLR073C	YLR073C	0.975204	0.648268	-0.171	-1.671	-0.301	-0.15	0.636	-0.041	-0.03	0.5	0.2325	-0.856	-0.1655	0.175	1
YOR010C	TIR2	0.239928	-0.363641	0.086	0.196	-0.103	0.029	-0.029	0.194	0.26	0.321	0.0285	0.195	0.0785	0.175	1
YBR062C	YBR062C	0.442969	-0.609367	-0.041	0.291	0.265	0.592	0.094	0.037	0.322	-0.244	0.0265	0.164	0.2935	0.174	1
YDR219C	MFB1	0.74346	0.887683	0.27	0.043	0.272	0.712	-0.391	-0.403	-0.374	-0.364	-0.0605	-0.18	-0.051	0.174	1
YPL222W	FMP40	0.515497	-0.806825	0.138	0.071	0.358	0.576	0.087	-0.012	-0.28	-0.228	0.1125	0.0295	0.039	0.174	1
YBR186W	PCH2	0.193165	0.044387	-0.044	-0.035	-0.175	0.335	0.039	0.092	-0.027	0.012	-0.0025	0.0285	-0.101	0.1735	1
YNR050C	LYS9	1.85302	-0.547887	0.052	1.202	0.372	1.283	-0.947	-1.483	-0.402	-0.937	-0.4475	-0.1405	-0.015	0.173	0
YBR067C	TIP1	0.294679	-0.399244	-0.159	0.056	0.31	0.363	-0.017	-0.051	-0.103	-0.018	-0.088	0.0025	0.1035	0.1725	1
YDR117C	TMA64	0.140732	-0.143465	-0.079	0.012	0.018	0.256	0.086	0.09	0.151	0.088	0.0035	0.051	0.0845	0.172	1
YJR111C	YJR111C	0.484593	-0.375019	0.161	-0.43	0.28	0.594	0.088	-0.081	-0.036	-0.25	0.1245	-0.2555	0.122	0.172	1
YPR013C	YPR013C	0.162719	-0.392125	0.104	0.201	0.263	0.019	0.092	0.098	0.224	0.325	0.098	0.1495	0.2435	0.172	1
YDR458C	HEH2	0.621069	0.365191	-0.063	-1.065	-0.004	0.096	0.544	0.005	-0.088	0.246	0.2405	-0.53	-0.046	0.171	1
YLR254C	NDL1	0.399349	-0.054759	0.288	0.388	0.29	0.367	0.005	-0.091	-0.128	-0.025	0.1465	0.1485	0.081	0.171	1
YDR131C	YDR131C	0.074748	0.892437	0.051	0.114	0.397	0.244	0.057	0.094	0.394	0.096	0.054	0.104	0.3955	0.17	1
YHL032C	GUT1	1.25741	-0.33241	-0.126	-0.018	1.225	1.31	-0.19	-0.11	0.172	-0.971	-0.158	-0.064	0.6985	0.1695	0
YDR063W	YDR063W	0.247938	-0.013462	0.17	-0.286	0.058	0.251	0.258	0.147	-0.094	0.085	0.214	-0.0695	-0.018	0.168	1
YGL014W	PUF4	0.718192	-0.117826	-0.072	-0.48	-0.567	-0.27	0.08	-0.105	0.497	0.606	0.004	-0.2925	-0.035	0.168	1
YJL049W	YJL049W	0.293657	-0.574143	-0.041	0.318	0.198	0.285	0.083	-0.104	-0.113	0.051	0.021	0.107	0.0425	0.168	1
YJR052W	RAD7	0.842504	0.067973	0.379	-1.109	0.188	-0.398	0.523	0.074	-0.189	0.732	0.451	-0.5175	-0.0005	0.167	1
YMR027W	YMR027W	0.649106	-0.970626	0.067	-0.073	-0.256	0.738	0.167	0.083	0.331	-0.405	0.117	0.005	0.0375	0.1665	1
YNL056W	OCA2	0.368854	-0.581093	0.163	0.31	0.07	0.237	-0.211	-0.309	0.106	0.096	-0.024	0.0005	0.088	0.1665	1
YOL152W	FRE7	0.115079	0.018275	0.109	0.026	0.274	0.115	0.089	0.038	0.069	0.217	0.099	0.032	0.1715	0.166	1
YKL183W	LOT5	0.186472	-0.644253	0.079	0.039	0.035	0.347	0.136	0.101	0.02	-0.016	0.1075	0.07	0.0275	0.1655	1
YOR003W	YSP3	0.227712	0.459258	0.275	-0.294	0.226	0.185	-0.029	-0.089	-0.041	0.144	0.123	-0.1915	0.0925	0.1645	1
YNL294C	RIM21	0.965797	-0.371397	-0.231	-0.499	-1.416	-0.105	-0.248	-0.097	0.395	0.433	-0.2395	-0.298	-0.5105	0.164	1
YBR044C	TCM62	1.21555	0.946717	-0.124	-0.266	-1.903	-0.652	0.833	1.035	-1.102	0.979	0.3545	0.3845	-1.5025	0.1635	0
YLR054C	OSW2	0.152219	0.86776	-0.046	-0.595	-0.063	0.195	-0.025	-0.379	-0.267	0.132	-0.0355	-0.487	-0.165	0.1635	1
YPR011C	YPR011C	0.52447	-0.146308	-0.013	-0.747	0.252	0.46	0.163	-0.143	-0.342	-0.133	0.075	-0.445	-0.045	0.1635	1
YDR508C	GNP1	0.185724	0.637825	-0.121	-0.166	0.108	-0.022	-0.113	-0.197	0.101	0.348	-0.117	-0.1815	0.1045	0.163	1
YER053C	PIC2	0.114618	0.523762	0.067	0.183	0.005	0.15	-0.049	-0.008	-0.039	0.176	0.009	0.0875	-0.017	0.163	1
YNL128W	TEP1	0.737079	0.262427	0.206	-0.028	0.258	0.545	-0.236	-0.444	-0.847	-0.219	-0.015	-0.236	-0.2945	0.163	1
YNL022C	YNL022C	0.162347	0.726608	0.15	-0.069	0.188	0.287	-0.047	-0.119	0.142	0.038	0.0515	-0.094	0.165	0.1625	1
YGL050W	TYW3	0.320923	-0.814164	0.118	0.139	0.172	0.437	-0.001	-0.029	-0.087	-0.113	0.0585	0.055	0.0425	0.162	1
YDR213W	UPC2	0.229115	0.295176	0.048	-0.23	-0.021	0.216	-0.017	-0.02	-0.408	0.107	0.0155	-0.125	-0.2145	0.1615	1
YPL064C	CWC27	0.109738	0.710083	-0.119	-0.078	0.004	0.136	0.078	-0.084	0.086	0.187	-0.0205	-0.081	0.045	0.1615	1
YDR134C	YDR134C	0.111555	0.606691	0.024	0.09	0.23	0.237	0.05	0.063	0.388	0.084	0.037	0.0765	0.309	0.1605	1
YLR289W	GUF1	0.274133	0.685515	-0.172	-0.248	0.512	0.002	-0.056	0.147	0.337	0.319	-0.114	-0.0505	0.4245	0.1605	1
YGL056C	SDS23	0.716913	0.357974	0.103	0.035	-0.484	0.824	-0.137	-0.313	-0.821	-0.504	-0.017	-0.139	-0.6525	0.16	1
YLR415C	YLR415C	0.092786	0.634704	-0.008	0.071	0.299	0.153	0.035	0.117	0.125	0.167	0.0135	0.094	0.212	0.16	1
YOR111W	YOR111W	0.137936	0.750904	0.049	0.226	0.021	0.201	0.042	0.062	-0.185	0.119	0.0455	0.144	-0.082	0.16	1
YBL046W	PSY4	0.579838	0.051154	-0.043	0.264	0.479	0.498	-0.248	-0.214	-0.305	-0.18	-0.1455	0.025	0.087	0.159	1
YBR228W	SLX1	0.197465	0.330035	0.251	0.113	0.032	0.314	0.119	-0.093	0.029	0.004	0.185	0.01	0.0305	0.159	1
YCR016W	YCR016W	0.244609	-0.379926	0.13	0.045	0.103	0.389	0.095	-0.073	0.211	-0.072	0.1125	-0.014	0.157	0.1585	1
YOR324C	FRT1	0.192633	-0.318572	0.062	0.18	0.244	0.12	-0.044	0.024	-0.083	0.197	0.009	0.102	0.0805	0.1585	1
YDR482C	CWC21	0.132866	0.45863	0.019	0.007	-0.046	0.063	-0.125	-0.076	0.037	0.253	-0.053	-0.0345	-0.0045	0.158	1
YHL034C	SBP1	0.495775	0.805246	-0.805	-0.316	-0.2	-0.116	-0.269	-0.194	0.417	0.432	-0.537	-0.255	0.1085	0.158	1
YIL076W	SEC28	1.68729	0.295571	-1.008	0.021	1.005	1.645	-1.419	-0.814	-0.29	-1.329	-1.2135	-0.3965	0.3575	0.158	0
YLL046C	RNP1	0.125704	-0.66746	0.108	0.226	0.203	0.045	0.108	0.133	0.144	0.271	0.108	0.1795	0.1735	0.158	1
YGR127W	YGR127W	0.305677	0.545008	-0.174	-0.619	0.172	0.247	-0.574	-0.215	0.036	0.068	-0.374	-0.417	0.104	0.1575	1
YCR092C	MSH3	0.198319	-0.089064	-0.109	0.095	0.131	0.319	0.027	-0.086	0.098	-0.005	-0.041	0.0045	0.1145	0.157	1
YLR352W	YLR352W	0.061697	0.901122	-0.065	0.065	-0.16	0.134	0.045	0.036	-0.173	0.18	-0.01	0.0505	-0.1665	0.157	1
YPR120C	CLB5	1.04642	-0.659197	0.419	0.537	-1.414	0.595	-0.209	0.267	0.359	-0.282	0.105	0.402	-0.5275	0.1565	1
YER081W	SER3	0.473792	-0.893958	0.146	0.22	0.248	0.566	0.092	-0.065	-0.128	-0.254	0.119	0.0775	0.06	0.156	1
YDR026C	YDR026C	0.170378	0.017001	0.096	0.247	0.42	0.061	0.045	0.116	0.173	0.249	0.0705	0.1815	0.2965	0.155	1
YGR292W	MAL12	0.31075	0.137248	0.003	0.022	0.497	0.455	0.108	0.076	0.386	-0.145	0.0555	0.049	0.4415	0.155	1
YKR044W	UIP5	0.649816	0.72282	-0.019	-0.769	0.138	-0.243	0.361	0.132	0.453	0.553	0.171	-0.3185	0.2955	0.155	1
YIL071C	PCI8	0.531475	-0.977253	0.191	0.244	0.672	0.151	0.176	-0.006	-0.361	0.158	0.1835	0.119	0.1555	0.1545	1
YPL200W	CSM4	0.990261	-0.272913	0.117	0.206	0.218	0.917	-0.508	-0.357	-0.725	-0.608	-0.1955	-0.0755	-0.2535	0.1545	1
YDR225W	HTA1	0.081769	0.85523	-0.006	0.324	0.085	0.182	0.002	0.18	0.138	0.126	-0.002	0.252	0.1115	0.154	1
YOR133W	EFT1	0.506774	-0.318796	0.066	0.058	0.102	0.579	-0.367	0.197	-0.211	-0.271	-0.1505	0.1275	-0.0545	0.154	1
YCL034W	LSB5	0.5332	-0.673299	0.108	0.329	-0.057	-0.191	-0.122	0.112	0.693	0.498	-0.007	0.2205	0.318	0.1535	1
YKR039W	GAP1	0.362903	0.444095	-0.173	0.094	0.256	0.471	-0.421	-0.021	0.477	-0.164	-0.297	0.0365	0.3665	0.1535	1
YOR009W	TIR4	0.148164	0.289989	0.106	0.219	0.413	0.029	0.107	0.098	0.305	0.277	0.1065	0.1585	0.359	0.153	1
YOR302W	YOR302W	0.857643	-0.897465	-0.014	-0.19	-0.27	-0.473	0.224	0.354	0.741	0.779	0.105	0.082	0.2355	0.153	1
YJR142W	YJR142W	0.121115	0.856342	0.08	0.028	-0.322	0.034	0.051	0.04	-0.283	0.271	0.0655	0.034	-0.3025	0.1525	1
YOR047C	STD1	0.489716	0.633257	-0.223	-0.526	-0.049	-0.164	-0.097	0.025	0.44	0.469	-0.16	-0.2505	0.1955	0.1525	1
YOR219C	STE13	0.243173	-0.570562	0.1	0.099	0.241	0.392	0.049	0.098	0.174	-0.087	0.0745	0.0985	0.2075	0.1525	1
YKL031W	YKL031W	0.29215	0.590863	-0.087	-0.453	0.052	-0.045	-0.009	-0.038	0.145	0.348	-0.048	-0.2455	0.0985	0.1515	1
YBR169C	SSE2	0.440935	-0.96903	0.105	0.161	0.506	0.398	0.029	-0.03	-0.195	-0.096	0.067	0.0655	0.1555	0.151	1
YLR258W	GSY2	0.505547	0.798022	-0.409	-1.188	-0.02	0.013	-0.322	-0.291	0.346	0.289	-0.3655	-0.7395	0.163	0.151	1
YLR386W	VAC14	1.32832	0.392328	-1.103	-0.659	-0.704	-0.191	-0.09	1.336	0.555	0.492	-0.5965	0.3385	-0.0745	0.1505	0
YKR034W	DAL80	1.14218	-0.007951	-0.14	-1.45	0.025	-0.636	0.365	0.129	0.07	0.935	0.1125	-0.6605	0.0475	0.1495	1
YNL109W	YNL109W	0.364316	-0.20355	-0.133	0.318	-0.03	-0.189	-0.04	0.118	-0.189	0.487	-0.0865	0.218	-0.1095	0.149	1
YBR027C	YBR027C	0.380231	-0.995993	0.117	0.203	0.123	0.504	0.021	-0.034	0.037	-0.207	0.069	0.0845	0.08	0.1485	1
YNR069C	BSC5	0.137712	0.035715	0.129	-0.011	0.14	0.271	0.055	0.028	0.234	0.026	0.092	0.0085	0.187	0.1485	1
YPL207W	TYW1	0.215459	-0.012538	0.022	0.263	0.145	0.253	-0.065	-0.103	0.167	0.044	-0.0215	0.08	0.156	0.1485	1
YOR338W	YOR338W	0.509113	0.581985	0.096	-0.863	0.541	0.212	0.23	0.078	0.199	0.084	0.163	-0.3925	0.37	0.148	1
YDR494W	RSM28	0.270913	-0.288345	-0.167	0.265	-0.023	0.17	-0.032	-0.133	0.316	0.125	-0.0995	0.066	0.1465	0.1475	1
YML068W	ITT1	0.339672	-0.646721	0.054	0.14	0.143	0.437	-0.027	-0.044	-0.15	-0.142	0.0135	0.048	-0.0035	0.1475	1
YDR492W	IZH1	0.289487	-0.895501	0.054	0.169	0.285	0.346	0.059	-0.015	-0.092	-0.053	0.0565	0.077	0.0965	0.1465	1
YGL121C	GPG1	0.09762	0.916549	0.004	0.002	0.28	0.194	0.047	0.079	0.134	0.099	0.0255	0.0405	0.207	0.1465	1
YOR208W	PTP2	0.308219	-0.999062	0.203	0.119	-0.143	0.132	0.076	0.184	0.456	0.161	0.1395	0.1515	0.1565	0.1465	1
YER030W	CHZ1	0.131405	0.79038	0.1	0.251	0.654	0.226	0.207	0.335	0.496	0.066	0.1535	0.293	0.575	0.146	1
YOR307C	SLY41	0.208284	0.00159	0.051	-0.088	0.061	0.23	0.026	0.07	-0.285	0.062	0.0385	-0.009	-0.112	0.146	1
YDL078C	MDH3	0.264898	-0.476814	0.081	0.308	0.229	0.123	0.046	0.011	-0.206	0.168	0.0635	0.1595	0.0115	0.1455	1
YJL137C	GLG2	0.223809	0.08227	0.049	0.084	0.162	0.27	-0.035	0.185	0.51	0.021	0.007	0.1345	0.336	0.1455	1
YDR384C	ATO3	0.616633	0.454908	0.141	-0.78	-0.102	-0.137	0.267	0.218	0.335	0.427	0.204	-0.281	0.1165	0.145	1
YOR330C	MIP1	1.77738	0.84859	0.077	0.898	1.688	0.921	-1.313	-1.271	-0.207	-0.631	-0.618	-0.1865	0.7405	0.145	0
YBR116C	YBR116C	0.181921	0.556351	-0.104	-0.266	-0.012	0.174	-0.022	-0.25	-0.361	0.114	-0.063	-0.258	-0.1865	0.144	1
YBR208C	DUR1,2	0.294154	-0.397657	-0.101	0.107	0.281	0.263	-0.02	-0.044	-0.229	0.025	-0.0605	0.0315	0.026	0.144	1
YLR353W	BUD8	0.15857	0.452266	0.111	0.106	0.455	0.001	0.071	0.114	0.322	0.286	0.091	0.11	0.3885	0.1435	1
YER090W	TRP2	1.14657	-0.052399	-0.216	0.408	-0.253	1.034	0.37	-0.167	-1.44	-0.748	0.077	0.1205	-0.8465	0.143	1
YFL040W	YFL040W	0.225765	-0.734214	0.073	0.081	0.363	0.304	0.076	0.112	0.048	-0.018	0.0745	0.0965	0.2055	0.143	1
YFR025C	HIS2	0.614425	-0.839423	-0.017	0.135	0.076	0.752	-0.01	0.295	0.106	-0.466	-0.0135	0.215	0.091	0.143	1
YOR170W	YOR170W	0.340913	-0.521511	-0.031	0.289	-0.018	-0.145	-0.01	0.103	0.297	0.43	-0.0205	0.196	0.1395	0.1425	1
YOR192C	THI72	0.217221	0.400813	-0.023	0.152	0.265	-0.051	-0.074	0.053	0.428	0.336	-0.0485	0.1025	0.3465	0.1425	1
YPL102C	YPL102C	1.71866	0.090814	-0.118	3.149	0.414	0.774	-0.155	-0.04	0.193	-0.489	-0.1365	1.5545	0.3035	0.1425	0
YPL248C	GAL4	0.148012	-0.867027	0.032	0.15	0.032	0.272	0.073	0.058	0.134	0.013	0.0525	0.104	0.083	0.1425	1
YCL075W	YCL075W	0.144424	0.449825	0.034	0.016	0.343	0.231	0.202	0.161	0.393	0.053	0.118	0.0885	0.368	0.142	1
YMR121C	RPL15B	0.186999	-0.191374	0.022	0.117	0.225	0.328	0.044	0.132	0.231	-0.045	0.033	0.1245	0.228	0.1415	1
YER115C	SPR6	0.290063	-0.975123	0.343	0.214	0.069	0.089	-0.164	0.098	0.304	0.193	0.0895	0.156	0.1865	0.141	1
YML067C	ERV41	0.169286	0.287587	-0.049	0.102	-0.214	0.118	0.017	0.099	0.115	0.163	-0.016	0.1005	-0.0495	0.1405	1
YMR073C	IRC21	1.12301	-0.775345	0.21	0.453	0.345	1.109	-0.105	-0.125	-0.582	-0.828	0.0525	0.164	-0.1185	0.1405	1
YGR136W	LSB1	0.225787	-0.150512	0.154	-0.068	0.445	-0.01	0.104	0.139	0.182	0.289	0.129	0.0355	0.3135	0.1395	1
YNL320W	YNL320W	0.102048	0.750756	0.126	0.154	0.259	0.187	0.033	0.264	0.368	0.092	0.0795	0.209	0.3135	0.1395	1
YNR055C	HOL1	0.306524	-0.007418	0.018	0.054	0.108	0.234	0.173	-0.205	-0.391	0.045	0.0955	-0.0755	-0.1415	0.1395	1
YPL136W	YPL136W	0.449284	-0.962567	0.122	0.241	0.359	-0.162	0.068	0.057	-0.279	0.441	0.095	0.149	0.04	0.1395	1
YPL221W	FLC1	0.405506	0.259527	-0.047	-0.254	-0.107	0.469	-0.023	-0.264	-0.579	-0.19	-0.035	-0.259	-0.343	0.1395	1
YDR351W	SBE2	0.247065	-0.793963	-0.013	-0.126	0.018	0.358	0.122	0.041	0.091	-0.081	0.0545	-0.0425	0.0545	0.1385	1
YNR075W	COS10	0.445126	0.304177	0.125	0.175	-0.133	0.511	0.091	-0.179	-0.464	-0.235	0.108	-0.002	-0.2985	0.138	1
YOR270C	VPH1	0.556931	-0.180521	0.035	0.042	-0.777	-0.091	-0.634	-0.489	-0.228	0.367	-0.2995	-0.2235	-0.5025	0.138	1
YCL074W	YCL074W	0.559621	0.298469	-0.065	-0.669	0.428	-0.271	0.269	-0.006	0.239	0.545	0.102	-0.3375	0.3335	0.137	1
YER016W	BIM1	0.624186	-0.863048	-0.548	0.026	-0.046	0.619	0.156	-0.338	-0.078	-0.345	-0.196	-0.156	-0.062	0.137	1
YPL232W	SSO1	0.118824	-0.864574	0.093	0.097	0.207	0.214	0.117	0.085	0.028	0.06	0.105	0.091	0.1175	0.137	1
YBR090C	YBR090C	0.202895	-0.415188	0.118	0.059	0.308	-0.048	0.048	0.073	0.155	0.321	0.083	0.066	0.2315	0.1365	1
YDR179W-A	YDR179W-A	0.216256	0.761608	-0.046	-0.348	-0.224	0.118	0.175	0.001	-0.101	0.154	0.0645	-0.1735	-0.1625	0.136	1
YOR021C	YOR021C	0.130207	0.344596	-0.089	0.129	-0.029	0.035	0.068	0.09	-0.058	0.237	-0.0105	0.1095	-0.0435	0.136	1
YPR188C	MLC2	0.249781	-0.892843	0.132	0.029	0.321	0.143	0.13	0.12	-0.17	0.129	0.131	0.0745	0.0755	0.136	1
YAL015C	NTG1	0.640349	-0.935951	0.124	-0.13	0.457	0.668	0.254	0.212	-0.153	-0.397	0.189	0.041	0.152	0.1355	1
YDR377W	ATP17	0.450767	-0.597305	0.346	0.553	0.058	0.305	-0.209	-0.071	0.079	-0.034	0.0685	0.241	0.0685	0.1355	1
YGR097W	ASK10	0.291461	0.867872	-0.048	-0.495	-0.338	0.093	0.074	-0.118	0.081	0.178	0.013	-0.3065	-0.1285	0.1355	1
YHL046C	PAU13	0.281322	-0.603397	-0.024	-0.083	0.066	-0.137	-0.074	0.047	0.078	0.408	-0.049	-0.018	0.072	0.1355	1
YJL021C	BBC1_p	0.315546	-0.873582	0.051	0.218	0.14	-0.12	0.067	-0.004	-0.156	0.391	0.059	0.107	-0.008	0.1355	1
YKR089C	TGL4	0.123486	0.461085	0.03	0.033	0.054	0.112	0.066	-0.06	0.275	0.159	0.048	-0.0135	0.1645	0.1355	1
YNL119W	NCS2	1.27164	0.242218	1.763	0.84	1.913	0.441	0.561	0.305	-0.176	-0.17	1.162	0.5725	0.8685	0.1355	0
YHR139C	SPS100	0.222208	-0.306926	0.026	0.055	-0.181	0.339	0.112	0.017	-0.032	-0.069	0.069	0.036	-0.1065	0.135	1
YAL049C	YAL049C	0.687253	0.472736	0.09	-1.115	0.164	-0.314	0.409	-0.131	0.043	0.583	0.2495	-0.623	0.1035	0.1345	1
YPR125W	YLH47	0.114147	0.423718	0.145	0.135	0.215	0.055	0.071	0.191	0.35	0.214	0.108	0.163	0.2825	0.1345	1
YIR043C	YIR043C	0.110033	-0.191294	0.093	0.119	0.087	0.225	0.163	0.118	-0.015	0.043	0.128	0.1185	0.036	0.134	1
YLR036C	YLR036C	0.435574	0.227973	0.218	-0.803	0.052	0.24	0.162	-0.12	-0.441	0.025	0.19	-0.4615	-0.1945	0.1325	1
YMR273C	ZDS1	1.07775	-0.734981	0.037	-0.443	-0.723	-0.822	-0.374	-0.562	0.184	1.086	-0.1685	-0.5025	-0.2695	0.132	1
YOL035C	YOL035C	0.268808	0.955254	0.272	0.104	-0.447	0.323	0.096	-0.202	-0.583	-0.059	0.184	-0.049	-0.515	0.132	1
YDR282C	YDR282C	0.211265	-0.057774	-0.075	0.316	-0.036	0.038	-0.13	-0.015	0.14	0.225	-0.1025	0.1505	0.052	0.1315	1
YPL267W	ACM1	0.442107	-0.958403	0.059	0.086	-0.146	-0.26	0.104	0.102	0.262	0.523	0.0815	0.094	0.058	0.1315	1
YBL036C	YBL036C	0.681643	-0.774519	-0.007	0.044	0.524	0.753	-0.02	-0.014	-0.026	-0.493	-0.0135	0.015	0.249	0.13	1
YLR200W	YKE2	1.61536	0.773682	0.501	1.249	0.375	0.875	-1.192	-0.652	-0.942	-0.616	-0.3455	0.2985	-0.2835	0.1295	0
YDR157W	YDR157W	0.877018	0.762843	-0.1	-1.305	-0.545	-0.239	0.547	0.049	-0.013	0.497	0.2235	-0.628	-0.279	0.129	1
YGR068C	YGR068C	0.162353	0.988493	0.104	-0.11	0.417	0.027	0.236	0.105	0.43	0.231	0.17	-0.0025	0.4235	0.129	1
YLR364W	YLR364W	0.411712	0.223073	0.292	0.474	-0.03	0.294	-0.093	-0.159	-0.165	-0.039	0.0995	0.1575	-0.0975	0.1275	1
YMR164C	MSS11	0.138114	-0.107852	0.026	0.094	0.103	0.258	-0.023	0.06	0.171	-0.003	0.0015	0.077	0.137	0.1275	1
YDR522C	SPS2	0.378379	-0.335245	0.095	0.203	-0.274	0.475	0.049	0.269	0.012	-0.221	0.072	0.236	-0.131	0.127	1
YKL137W	YKL137W	0.459835	-0.053351	-0.377	-0.082	-0.244	-0.245	0.055	0.05	0.053	0.499	-0.161	-0.016	-0.0955	0.127	1
YPL074W	YTA6	0.184863	-0.131371	-0.075	0.047	0.097	-0.053	0.005	0.063	0.118	0.307	-0.035	0.055	0.1075	0.127	1
YPL019C	VTC3	0.60194	0.467791	-0.223	-0.403	-0.47	-0.284	0.2	0.027	0.174	0.535	-0.0115	-0.188	-0.148	0.1255	1
YDL213C	NOP6	0.283874	0.60381	0.113	0.402	0.417	0.192	-0.144	-0.051	0.235	0.058	-0.0155	0.1755	0.326	0.125	1
YIL043C	CBR1	0.477435	0.506127	-0.011	-0.263	-0.06	0.514	-0.208	-0.432	-0.549	-0.264	-0.1095	-0.3475	-0.3045	0.125	1
YDL134C-A	RPL41B_p	0.221515	-0.230947	-0.046	0.075	0.071	-0.057	0.094	0.04	0.28	0.306	0.024	0.0575	0.1755	0.1245	1
YPR015C	YPR015C	0.180275	-0.812253	0.078	0.163	0.206	0.236	0.071	0.014	-0.033	0.011	0.0745	0.0885	0.0865	0.1235	1
YOR090C	PTC5	0.141284	0.656722	0.005	0.044	0.332	0.239	-0.011	0.066	0.173	0.007	-0.003	0.055	0.2525	0.123	1
YBR020W	GAL1	0.34559	-0.495586	0.021	0.142	-0.117	0.443	0.004	-0.114	-0.149	-0.198	0.0125	0.014	-0.133	0.1225	1
YNL129W	NRK1	0.232055	-0.73674	-0.097	-0.091	0.08	0.344	-0.054	-0.071	-0.05	-0.099	-0.0755	-0.081	0.015	0.1225	1
YOR315W	SFG1	0.333388	-0.297352	0.022	-0.02	0.101	0.33	0.039	0.094	-0.408	-0.085	0.0305	0.037	-0.1535	0.1225	1
YOR177C	MPC54	0.17291	0.477826	-0.017	-0.063	-0.055	-0.011	0.047	0.073	0.107	0.255	0.015	0.005	0.026	0.122	1
YCR059C	YIH1	0.317267	-0.631025	-0.049	-0.115	-0.399	0.318	0.059	-0.097	0.087	-0.075	0.005	-0.106	-0.156	0.1215	1
YDR306C	YDR306C	0.562026	-0.9525	0.208	0.29	0.454	0.566	0.043	-0.057	-0.115	-0.324	0.1255	0.1165	0.1695	0.121	1
YKR010C	TOF2	0.235288	0.525324	-0.054	-0.313	-0.217	0.353	0.022	-0.296	-0.208	-0.111	-0.016	-0.3045	-0.2125	0.121	1
YKL001C	MET14	0.232496	-0.796376	0.35	0.304	0.061	0.115	-0.006	0.148	0.316	0.126	0.172	0.226	0.1885	0.1205	1
YKL163W	PIR3	0.426186	-0.682899	0.125	0.135	0.261	0.54	0.002	0.158	0.321	-0.301	0.0635	0.1465	0.291	0.1195	1
YBR113W	YBR113W	0.232699	0.535769	0.098	-0.419	0.232	0.211	0.191	-0.038	0.063	0.026	0.1445	-0.2285	0.1475	0.1185	1
YGL248W	PDE1	0.19354	0.780495	0.141	-0.309	0.302	0.191	0.09	-0.192	-0.033	0.045	0.1155	-0.2505	0.1345	0.118	1
YGR154C	GTO1	0.232339	0.607957	0.093	0.073	-0.175	0.328	-0.046	-0.063	-0.18	-0.094	0.0235	0.005	-0.1775	0.117	1
YGR235C	YGR235C	0.16687	-0.240775	0.055	0.095	0.164	0.208	0.008	0.03	-0.104	0.026	0.0315	0.0625	0.03	0.117	1
YLR456W	YLR456W	0.371659	-0.074765	0.218	-0.144	0.184	0.355	0.223	-0.033	-0.376	-0.121	0.2205	-0.0885	-0.096	0.117	1
YPR170C	YPR170C	0.286306	0.100832	-0.278	-0.391	-0.09	0.271	-0.093	-0.018	0.153	-0.038	-0.1855	-0.2045	0.0315	0.1165	1
YML131W	YML131W	0.252062	-0.521259	0.098	-0.096	0.259	0.011	0.089	-0.034	-0.195	0.221	0.0935	-0.065	0.032	0.116	1
YBR043C	QDR3	0.192753	-0.983773	-0.052	0.133	0.087	0.276	0.099	-0.006	0.034	-0.046	0.0235	0.0635	0.0605	0.115	1
YMR252C	YMR252C	0.325527	-0.349692	0.286	0.199	0.301	0.316	0.059	-0.019	-0.102	-0.087	0.1725	0.09	0.0995	0.1145	1
YNL271C	BNI1	0.511057	-0.504762	0.089	-0.282	-0.65	0.246	0.253	0.193	0.2	-0.018	0.171	-0.0445	-0.225	0.114	1
YNL321W	YNL321W	0.084707	0.318637	0.159	-0.002	0.157	0.126	0.06	0.028	0.025	0.102	0.1095	0.013	0.091	0.114	1
YDR137W	RGP1	1.67258	0.558415	2.652	1.507	-1.66	0.892	0.209	0.446	-0.367	-0.665	1.4305	0.9765	-1.0135	0.1135	0
YMR250W	GAD1	0.609615	0.835123	-0.13	-0.668	-0.055	-0.218	0.278	0.119	0.456	0.445	0.074	-0.2745	0.2005	0.1135	1
YML004C	GLO1	1.53722	-0.935247	0.172	-0.043	0.793	1.503	0.212	-0.136	-0.516	-1.277	0.192	-0.0895	0.1385	0.113	0
YLR263W	RED1	0.158509	0.451763	0.066	0.091	0.132	0.217	-0.014	-0.109	0.032	0.007	0.026	-0.009	0.082	0.112	1
YGR028W	MSP1	0.18964	-0.895843	0.049	0.149	0.221	-0.013	0.054	0.003	-0.026	0.235	0.0515	0.076	0.0975	0.111	1
YIL087C	YIL087C	0.159553	0.545241	-0.067	0.009	0.161	-0.04	-0.057	-0.002	0.263	0.262	-0.062	0.0035	0.212	0.111	1
YKR103W	NFT1	0.192201	-0.528776	0.037	0.067	0.141	0.295	0.035	0.143	0.222	-0.073	0.036	0.105	0.1815	0.111	1
YOL075C	YOL075C	0.132168	0.794386	0.04	0.167	-0.297	0.104	0.02	0.021	-0.078	0.118	0.03	0.094	-0.1875	0.111	1
YJL105W	SET4	0.518024	-0.992297	-0.099	0.058	0.366	0.545	0.15	0.072	-0.14	-0.324	0.0255	0.065	0.113	0.1105	1
YBR126C	TPS1	2.22036	0.321002	0.086	0.191	1.548	1.032	-1.991	-1.277	-1.59	-0.813	-0.9525	-0.543	-0.021	0.1095	0
YDR067C	OCA6	0.123817	0.693506	-0.179	-0.149	-0.105	0.155	-0.095	0.032	0.01	0.064	-0.137	-0.0585	-0.0475	0.1095	1
YML086C	ALO1	0.159334	0.176326	-0.102	0.052	0.142	-0.04	-0.114	-0.048	0.091	0.258	-0.108	0.002	0.1165	0.109	1
YHR048W	YHR048W	0.340153	-0.2483	0.01	0.574	0.022	0.182	-0.106	-0.08	0.016	0.035	-0.048	0.247	0.019	0.1085	1
YNL192W	CHS1	1.28775	0.078185	1.006	1.158	1.585	0.605	0.105	2.052	-0.424	-0.388	0.5555	1.605	0.5805	0.1085	0
YNL204C	SPS18	0.313814	-0.641493	0.073	0.218	0.162	-0.002	0.049	-0.012	-0.378	0.219	0.061	0.103	-0.108	0.1085	1
YBR177C	EHT1	0.120247	-0.468401	0.07	-0.047	0.037	0.215	0.068	0.034	0.111	0.001	0.069	-0.0065	0.074	0.108	1
YLR313C	SPH1	0.187764	-0.143864	0.053	0.232	0.35	0.049	0.008	-0.012	0.094	0.167	0.0305	0.11	0.222	0.108	1
YNL187W	YNL187W	0.457051	-0.600329	0.057	-0.231	0.242	-0.319	-0.024	-0.093	-0.045	0.534	0.0165	-0.162	0.0985	0.1075	1
YBR139W	YBR139W	0.252309	-0.810028	0.048	0.267	0.056	0.013	-0.015	-0.159	0.241	0.2	0.0165	0.054	0.1485	0.1065	1
YLR126C	YLR126C	0.355389	0.035845	0.096	0.302	-0.115	0.362	-0.008	-0.172	-0.202	-0.15	0.044	0.065	-0.1585	0.106	1
YPR147C	YPR147C	0.253007	-0.789427	-0.027	-0.093	0.033	0.323	0.117	0.087	-0.084	-0.112	0.045	-0.003	-0.0255	0.1055	1
YGL257C	MNT2	0.317416	0.116564	0.17	0.017	0.078	0.105	-0.175	-0.144	-0.43	0.104	-0.0025	-0.0635	-0.176	0.1045	1
YNR060W	FRE4	0.273544	-0.199346	0.081	0.235	0.14	0.064	0.099	0.067	-0.374	0.145	0.09	0.151	-0.117	0.1045	1
YER007W	PAC2	0.288301	-0.826184	0.049	0.264	-0.22	0.035	0.179	-0.085	0.198	0.173	0.114	0.0895	-0.011	0.104	1
YCR069W	CPR4	0.107849	0.42774	0.055	0.112	0.262	0.202	0.061	0.087	0.178	0.005	0.058	0.0995	0.22	0.1035	1
YER108C	FLO8_p	0.247711	0.023621	0.166	0.242	0.129	0.28	0.074	0.009	-0.112	-0.073	0.12	0.1255	0.0085	0.1035	1
YLR278C	YLR278C	0.313142	-0.373265	0.131	0.25	-0.016	0.398	0.137	0.05	-0.08	-0.192	0.134	0.15	-0.048	0.103	1
YDR475C	JIP4	0.340005	-0.797192	0.056	0.148	0.159	0.384	-0.113	-0.074	-0.101	-0.179	-0.0285	0.037	0.029	0.1025	1
YIL014W	MNT3	0.256652	-0.694478	0.13	0.077	0.01	-0.153	0.118	0.067	-0.036	0.358	0.124	0.072	-0.013	0.1025	1
YDR474C	JIP4_p	0.165989	0.578305	-0.176	-0.051	0.053	0.223	-0.19	-0.251	0.16	-0.019	-0.183	-0.151	0.1065	0.102	1
YFL035C-B	RPL22B_p	0.090297	0.446406	0.137	-0.028	-0.089	0.066	0.047	0.085	-0.008	0.138	0.092	0.0285	-0.0485	0.102	1
YGL067W	NPY1	0.169883	0.550121	0.015	0.124	-0.335	0.084	-0.063	-0.191	-0.241	0.12	-0.024	-0.0335	-0.288	0.102	1
YNR061C	YNR061C	0.368915	-0.871886	0.041	-0.122	0.258	0.421	0.143	0.07	-0.04	-0.218	0.092	-0.026	0.109	0.1015	1
YOL065C	INP54	0.324069	0.295874	-0.329	-0.28	-0.043	-0.115	-0.102	0.145	-0.022	0.318	-0.2155	-0.0675	-0.0325	0.1015	1
YLL055W	YLL055W	0.196907	0.12848	0.253	-0.123	0.27	0.007	0.091	-0.088	-0.035	0.193	0.172	-0.1055	0.1175	0.1	1
YOR069W	VPS5	0.764708	-0.750477	0.139	0.33	-0.197	-0.502	0.132	0.393	0.744	0.702	0.1355	0.3615	0.2735	0.1	1
YOR365C	YOR365C	0.306133	-0.921364	0.159	0.138	0.232	0.179	0.088	0.046	-0.348	0.021	0.1235	0.092	-0.058	0.1	1
YMR322C	SNO4	0.250721	-0.460587	0.161	0.115	0.037	-0.119	0.078	0.1	-0.194	0.318	0.1195	0.1075	-0.0785	0.0995	1
YML037C	YML037C	0.259047	-0.24336	-0.026	-0.298	0.154	0.266	0.183	0.038	0.137	-0.068	0.0785	-0.13	0.1455	0.099	1
YIL124W	AYR1	0.529936	0.787926	0.052	-0.13	-0.201	0.388	-0.129	-0.589	-0.939	-0.191	-0.0385	-0.3595	-0.57	0.0985	1
YLR268W	SEC22	2.00766	0.225575	0.139	1.105	0.348	1.348	-1.069	-1.157	-1.465	-1.154	-0.465	-0.026	-0.5585	0.097	0
YPR145W	ASN1	0.267755	0.367864	-0.007	0.04	0.021	0.098	0.022	-0.183	-0.465	0.096	0.0075	-0.0715	-0.222	0.097	1
YER149C	PEA2	0.473977	-0.900623	0.122	0.205	0.415	0.512	0.12	0.071	-0.021	-0.319	0.121	0.138	0.197	0.0965	1
YDR034C	LYS14	0.537642	-0.814186	0.183	-0.03	-0.092	-0.358	0.238	0.178	0.444	0.549	0.2105	0.074	0.176	0.0955	1
YHR113W	YHR113W	0.112492	0.00402	0.142	0.043	0.015	0.073	-0.057	-0.001	-0.069	0.118	0.0425	0.021	-0.027	0.0955	1
YLR097C	HRT3	0.200022	-0.9655	0.227	0.159	0.109	-0.021	-0.044	-0.022	0.106	0.211	0.0915	0.0685	0.1075	0.095	1
YOR235W	IRC13	0.620696	0.605419	-0.56	-0.266	-1.815	0.199	-0.53	-0.787	-0.708	-0.009	-0.545	-0.5265	-1.2615	0.095	1
YGR161C	RTS3	0.173601	0.579457	0.158	0.199	0.117	0.146	0.024	0.003	-0.114	0.042	0.091	0.101	0.0015	0.094	1
YER186C	YER186C	0.232436	0.405197	0.146	-0.059	0.58	0.117	0.174	0.114	0.152	0.07	0.16	0.0275	0.366	0.0935	1
YKL110C	KTI12	0.970467	0.844566	1.262	0.562	-1.652	0.664	-0.093	0.113	-0.998	-0.477	0.5845	0.3375	-1.325	0.0935	1
YBR180W	DTR1	0.247389	-0.807284	0.06	0.146	0.278	-0.014	0.036	-0.127	-0.074	0.2	0.048	0.0095	0.102	0.093	1
YCR062W	YCR061W_p	0.335965	0.865922	-0.604	-0.729	-0.985	0.337	-0.388	-0.714	-0.577	-0.151	-0.496	-0.7215	-0.781	0.093	1
YLR179C	YLR179C	0.624035	-0.882198	0.015	0.048	0.294	0.707	0.152	0.003	0.124	-0.521	0.0835	0.0255	0.209	0.093	1
YDR143C	SAN1	0.685264	0.432642	0.079	-1.074	0.634	-0.036	0.28	0.189	0.213	0.22	0.1795	-0.4425	0.4235	0.092	1
YGL117W	YGL117W	0.18007	0.612346	-0.268	0.277	0.199	0.132	-0.164	-0.013	0.367	0.051	-0.216	0.132	0.283	0.0915	1
YBR239C	YBR239C	0.282934	-0.330529	0.158	0.275	0.265	0.346	-0.001	0.157	0.124	-0.165	0.0785	0.216	0.1945	0.0905	1
YDR321W	ASP1	0.220479	0.618347	0.113	0.001	-0.144	0.274	-0.006	-0.014	-0.357	-0.093	0.0535	-0.0065	-0.2505	0.0905	1
YGR157W	CHO2	1.74043	-0.142679	-0.504	-0.399	-2.734	-0.459	0.23	0.236	0.423	0.64	-0.137	-0.0815	-1.1555	0.0905	0
YPR109W	YPR109W	0.299424	-0.84011	0.061	0.134	-0.008	0.38	0.041	-0.013	-0.045	-0.199	0.051	0.0605	-0.0265	0.0905	1
YGL013C	PDR1	0.101166	0.283728	0.03	0.302	0.153	0.099	0.148	0.159	0.074	0.081	0.089	0.2305	0.1135	0.09	1
YDR496C	PUF6	0.650514	-0.882162	0.563	0.595	0.486	-0.045	-0.302	-0.216	0.023	0.224	0.1305	0.1895	0.2545	0.0895	1
YIR044C	YIR044C	0.438507	-0.75419	0.339	0.227	0.402	0.436	0.08	0.059	-0.038	-0.257	0.2095	0.143	0.182	0.0895	1
YLR284C	ECI1	0.094907	0.150249	0.033	0.123	0.145	0.172	0.027	0.035	0.113	0.007	0.03	0.079	0.129	0.0895	1
YPL061W	ALD6	0.475556	0.839946	-0.222	-0.085	0.136	-0.1	-0.972	-0.339	0.502	0.279	-0.597	-0.212	0.319	0.0895	1
YFR053C	HXK1	0.238859	0.950397	0.068	-0.089	0.634	0.118	0.085	0.001	0.169	0.058	0.0765	-0.044	0.4015	0.088	1
YGL151W	NUT1	0.604104	-0.402231	0.071	0.145	0.131	-0.443	0.147	0.4	0.642	0.619	0.109	0.2725	0.3865	0.088	1
YLR165C	PUS5	0.319364	0.297825	0.073	0.095	-0.061	0.348	0.039	-0.042	-0.404	-0.172	0.056	0.0265	-0.2325	0.088	1
YLR341W	SPO77	0.377156	0.057329	0.087	0.38	0.208	0.188	0.034	0.033	-0.429	-0.012	0.0605	0.2065	-0.1105	0.088	1
YNR019W	ARE2	0.124594	-0.788963	0.09	0.054	0.034	0.043	0.095	0.184	0.227	0.132	0.0925	0.119	0.1305	0.0875	1
YPR195C	YPR195C	0.530847	0.107639	0.135	0.038	0.24	0.427	-0.182	-0.342	-0.408	-0.253	-0.0235	-0.152	-0.084	0.087	1
YKL063C	YKL063C	0.32657	0.058912	0.057	0.111	0.236	-0.209	0.078	0.273	0.461	0.382	0.0675	0.192	0.3485	0.0865	1
YLR149C	YLR149C	0.468396	-0.177509	-0.269	-0.244	-0.109	0.541	-0.262	-0.454	-0.182	-0.369	-0.2655	-0.349	-0.1455	0.086	1
YDR422C	SIP1	0.521817	-0.039778	0.115	-0.583	-0.2	-0.293	-0.008	-0.028	0.241	0.463	0.0535	-0.3055	0.0205	0.085	1
YER135C	YER135C	0.378738	0.535043	-0.009	0.223	-0.001	0.118	-0.026	0.001	-0.722	0.052	-0.0175	0.112	-0.3615	0.085	1
YDR095C	YDR095C	0.205454	0.468986	0.055	0.151	-0.066	0.06	-0.139	-0.131	-0.288	0.109	-0.042	0.01	-0.177	0.0845	1
YBR157C	ICS2	0.233075	-0.578287	-0.173	0.019	-0.075	0.263	0.016	-0.17	0.058	-0.095	-0.0785	-0.0755	-0.0085	0.084	1
YDR530C	APA2	0.390115	-0.072581	0.132	0.156	0.256	0.38	-0.198	-0.13	-0.004	-0.212	-0.033	0.013	0.126	0.084	1
YMR068W	AVO2	0.544596	-0.36468	-0.033	-0.26	-0.079	0.51	0.4	0.048	-0.501	-0.342	0.1835	-0.106	-0.29	0.084	1
YMR144W	YMR144W	0.272493	-0.255671	0.04	0.226	0.256	0.342	0.049	0.054	0.289	-0.174	0.0445	0.14	0.2725	0.084	1
YOR005C	DNL4	0.068312	0.550009	0.022	0.089	0.13	0.114	0.052	0.027	0.231	0.053	0.037	0.058	0.1805	0.0835	1
YLR246W	ERF2	0.291515	-0.417433	0.168	0.31	0.273	0.364	0.159	0.362	0.135	-0.2	0.1635	0.336	0.204	0.082	1
YER055C	HIS1	0.126609	0.945223	-0.054	-0.174	-0.527	-0.039	0.011	-0.216	-0.534	0.202	-0.0215	-0.195	-0.5305	0.0815	1
YJR082C	EAF6	0.578804	-0.848491	0.17	0.336	-0.206	-0.38	0.293	0.385	0.48	0.543	0.2315	0.3605	0.137	0.0815	1
YKR088C	TVP38	0.35647	-0.912543	0.11	0.05	-0.017	0.393	0.137	0.03	0.328	-0.23	0.1235	0.04	0.1555	0.0815	1
YDR105C	TMS1	0.385164	-0.76981	-0.118	0.136	-0.224	-0.158	-0.176	-0.244	0.242	0.32	-0.147	-0.054	0.009	0.081	1
YPL095C	EEB1	0.142504	0.365718	0.115	0.113	-0.181	0.063	0.062	-0.157	-0.116	0.099	0.0885	-0.022	-0.1485	0.081	1
YLR130C	ZRT2	0.714912	-0.72612	0.214	0.079	0.272	0.644	-0.125	0.08	-0.54	-0.483	0.0445	0.0795	-0.134	0.0805	1
YOR245C	DGA1	0.117612	0.980486	0.037	-0.01	-0.416	0.09	0.059	0.076	-0.199	0.071	0.048	0.033	-0.3075	0.0805	1
YDL128W	VCX1	0.18113	0.582838	0.007	-0.065	0.199	-0.074	-0.07	0.009	0.357	0.234	-0.0315	-0.028	0.278	0.08	1
YGR212W	SLI1	0.283758	-0.473828	0.071	0.186	0.298	0.334	0.027	0.225	0.054	-0.175	0.049	0.2055	0.176	0.0795	1
YOR186W	YOR186W	1.11857	0.007647	0.207	-1.512	0.128	-0.59	0.578	0.236	-0.009	0.749	0.3925	-0.638	0.0595	0.0795	1
YJR099W	YUH1	0.114466	0.645032	-0.025	0.165	0.33	0.052	-0.012	0.143	0.109	0.106	-0.0185	0.154	0.2195	0.079	1
YNL336W	COS1	0.427688	-0.923867	0.183	0.151	0.4	0.401	0.194	0.07	-0.157	-0.243	0.1885	0.1105	0.1215	0.079	1
YJL199C	MBB1	0.330054	0.430676	-0.126	0.231	0.16	-0.013	-0.101	0.004	0.752	0.169	-0.1135	0.1175	0.456	0.078	1
YKL003C	MRP17	0.377231	0.673879	-0.863	-0.525	-0.609	-0.022	-0.666	-0.684	0.073	0.178	-0.7645	-0.6045	-0.268	0.078	1
YMR031W-A	YMR031W-A	2.71098	0.074891	2.094	0.698	0.544	2.185	0.12	0.009	-2.152	-2.029	1.107	0.3535	-0.804	0.078	0
YBR259W	YBR259W	0.150085	0.753227	0.1	0.189	0.038	0.16	0.006	-0.007	-0.087	-0.005	0.053	0.091	-0.0245	0.0775	1
YGR247W	CPD1	0.119931	0.671061	0.166	0.167	0.15	0.041	0.226	0.22	0.364	0.114	0.196	0.1935	0.257	0.0775	1
YMR141C	YMR141C	0.213027	0.416131	0.084	0.068	0.171	0.219	-0.031	-0.144	-0.037	-0.064	0.0265	-0.038	0.067	0.0775	1
YDR185C	YDR185C	0.401914	-0.838308	0.212	0.282	0.244	0.333	-0.018	-0.142	-0.145	-0.179	0.097	0.07	0.0495	0.077	1
YLR234W	TOP3	1.67702	-0.988581	-0.344	0.681	-1.015	1.335	-0.114	-0.98	0.435	-1.182	-0.229	-0.1495	-0.29	0.0765	0
YNL335W	DDI3	0.200007	-0.315135	0.067	-0.157	0.293	0.188	0.127	0.052	0.042	-0.035	0.097	-0.0525	0.1675	0.0765	1
YPL206C	YPL206C	0.446788	-0.432753	0.031	-0.104	0.104	0.503	-0.207	-0.216	0.063	-0.35	-0.088	-0.16	0.0835	0.0765	1
YCR001W	YCR001W	0.448443	-0.255731	0.049	-0.467	0.047	0.375	0.136	-0.064	-0.478	-0.224	0.0925	-0.2655	-0.2155	0.0755	1
YOL116W	MSN1	0.124156	0.871286	-0.071	-0.248	0.228	0.105	-0.127	-0.127	0.429	0.046	-0.099	-0.1875	0.3285	0.0755	1
YHR106W	TRR2	1.08507	0.203156	-0.426	-1.566	0.274	-0.286	0.613	0.196	0.21	0.436	0.0935	-0.685	0.242	0.075	1
YPR073C	LTP1	0.296579	0.01093	0.128	0.112	0.424	0.316	0.008	0.044	0.107	-0.166	0.068	0.078	0.2655	0.075	1
YNL108C	YNL108C	0.132063	-0.941637	0.175	0.089	0.109	0.125	-0.052	0.106	0.021	0.024	0.0615	0.0975	0.065	0.0745	1
YNL303W	YNL303W	0.150693	-0.005704	-0.074	-0.004	0.054	-0.05	0.071	-0.012	0.142	0.199	-0.0015	-0.008	0.098	0.0745	1
YOL053C-A	DDR2_p	0.157135	-0.471806	0.088	-0.018	-0.082	-0.052	-0.037	-0.092	0.037	0.2	0.0255	-0.055	-0.0225	0.074	1
YFR030W	MET10	0.464532	-0.203109	0.692	-0.456	-0.105	-0.099	-0.046	-0.01	-0.081	0.246	0.323	-0.233	-0.093	0.0735	1
YKR015C	YKR015C	0.395059	-0.883873	0.275	0.115	0.074	0.438	0.009	-0.026	0.121	-0.291	0.142	0.0445	0.0975	0.0735	1
YOR313C	SPS4	0.08636	-0.153322	-0.049	0.063	0.018	0.143	0.043	0.101	0	0.003	-0.003	0.082	0.009	0.073	1
YBR052C	RFS1	0.297151	-0.942464	0.114	0.196	0.243	0.291	0.095	0.038	-0.127	-0.146	0.1045	0.117	0.058	0.0725	1
YFL049W	SWP82	0.695442	-0.55292	-0.161	-0.805	-0.487	0.094	-0.056	0.195	0.473	0.05	-0.1085	-0.305	-0.007	0.072	1
YGR044C	RME1	0.099489	0.537696	0.11	0.005	0.062	0.126	-0.028	-0.023	-0.028	0.018	0.041	-0.009	0.017	0.072	1
YKR077W	YKR077W	0.158501	-0.175457	0.032	-0.147	-0.061	0.153	0.001	-0.034	0.185	-0.009	0.0165	-0.0905	0.062	0.072	1
YBR240C	THI2	0.250002	-0.45298	0.075	0.116	0.279	0.215	0.009	-0.096	-0.065	-0.072	0.042	0.01	0.107	0.0715	1
YLR219W	MSC3	0.245841	-0.923238	0.104	0.131	0.393	-0.029	0.034	0.046	-0.042	0.172	0.069	0.0885	0.1755	0.0715	1
YGL051W	MST27	0.286085	-0.715139	0.086	0.038	0.205	0.175	0.054	-0.019	-0.324	-0.033	0.07	0.0095	-0.0595	0.071	1
YGL015C	YGL015C	1.2075	0.976995	0.068	0.327	-0.064	0.846	-1.011	-0.848	-1.003	-0.705	-0.4715	-0.2605	-0.5335	0.0705	0
YHR073W	OSH3	0.207361	-0.951191	0.177	0.157	0.052	0.207	0.126	0.157	0.36	-0.066	0.1515	0.157	0.206	0.0705	1
YKL100C	YKL100C	0.32114	-0.120053	0.16	0.141	0.173	0.174	-0.055	-0.146	-0.318	-0.033	0.0525	-0.0025	-0.0725	0.0705	1
YKL158W	APE2_p	0.290738	0.386618	0.026	0.434	0.096	0.195	-0.167	-0.046	0.004	-0.054	-0.0705	0.194	0.05	0.0705	1
YOR058C	ASE1	0.897172	0.232317	0.069	0.15	0.379	0.532	-0.496	-0.698	-0.774	-0.391	-0.2135	-0.274	-0.1975	0.0705	1
YHR079C-B	SAE3	0.154387	0.420639	-0.124	0.07	0.326	0.028	-0.021	-0.061	0.08	0.112	-0.0725	0.0045	0.203	0.07	1
YDR100W	TVP15	0.408318	0.357205	-0.097	-0.007	0.067	0.363	-0.23	-0.401	-0.318	-0.225	-0.1635	-0.204	-0.1255	0.069	1
YNL044W	YIP3	0.137384	0.873495	-0.061	-0.043	-0.327	0.065	0.023	-0.027	-0.066	0.073	-0.019	-0.035	-0.1965	0.069	1
YOR288C	MPD1	0.266414	-0.49059	0.091	0.269	0.281	0.185	0.192	0.178	-0.179	-0.047	0.1415	0.2235	0.051	0.069	1
YPR062W	FCY1	0.163198	-0.206391	0.11	0.18	0.26	-0.072	0.081	0.023	0.221	0.21	0.0955	0.1015	0.2405	0.069	1
YFR023W	PES4	0.083554	-0.165333	0.044	0.026	0.192	0.114	0.061	0.052	0.056	0.022	0.0525	0.039	0.124	0.068	1
YMR087W	YMR087W	0.360639	-0.37268	0.036	0.023	0.117	0.184	0.087	0.001	-0.563	-0.05	0.0615	0.012	-0.223	0.067	1
YPL147W	PXA1	0.473977	0.976855	0.255	0.27	0.138	0.243	0.068	-0.022	-0.671	-0.109	0.1615	0.124	-0.2665	0.067	1
YJL013C	MAD3	0.102185	-0.899949	0.056	0.066	0.122	0.072	0.082	0.005	-0.071	0.061	0.069	0.0355	0.0255	0.0665	1
YNR024W	YNR024W	0.25151	-0.462168	-0.017	-0.003	0.135	0.299	0.071	0.061	0.293	-0.166	0.027	0.029	0.214	0.0665	1
YKL011C	CCE1	0.532831	0.006364	-0.331	-0.422	0.189	0.524	0.049	-0.287	0.555	-0.392	-0.141	-0.3545	0.372	0.066	1
YLR361C	DCR2	0.204135	-0.363272	-0.028	-0.117	0.068	-0.075	-0.168	-0.162	-0.188	0.207	-0.098	-0.1395	-0.06	0.066	1
YPL223C	GRE1	0.604093	0.467902	0.061	0.306	0.338	0.443	-0.358	-0.341	-0.207	-0.311	-0.1485	-0.0175	0.0655	0.066	1
YBR148W	YSW1	0.269488	-0.933821	0.093	0.173	0.257	-0.155	0.011	0.014	0.004	0.286	0.052	0.0935	0.1305	0.0655	1
YDR388W	RVS167	1.93933	-0.231169	1.297	0.325	0.279	0.95	-1.458	-1.236	-1.095	-0.819	-0.0805	-0.4555	-0.408	0.0655	0
YPR030W	CSR2	0.592046	-0.889014	0.252	0.174	-0.223	-0.482	0.021	-0.005	0.12	0.613	0.1365	0.0845	-0.0515	0.0655	1
YMR107W	SPG4	0.266266	-0.74916	0.022	0.208	0.138	0.287	0.111	0.045	-0.088	-0.158	0.0665	0.1265	0.025	0.0645	1
YNR062C	YNR062C	0.080702	-0.151866	0.05	0.081	0.117	0.144	0.035	0.058	0.121	-0.015	0.0425	0.0695	0.119	0.0645	1
YLR111W	YLR111W	0.778263	-0.337444	-0.943	-0.784	-0.129	-0.174	0.29	0.038	-0.144	0.302	-0.3265	-0.373	-0.1365	0.064	1
YMR110C	HFD1	0.564483	-0.891575	0.208	0.16	0.538	0.494	0.071	0.08	-0.176	-0.366	0.1395	0.12	0.181	0.064	1
YOR269W	PAC1	0.5814	-0.023714	-0.049	-0.533	-0.47	-0.403	-0.07	0.151	-0.577	0.531	-0.0595	-0.191	-0.5235	0.064	1
YER078C	YER078C	0.453916	-0.732432	-0.135	-0.065	-0.3	-0.23	-0.066	0.136	0.36	0.356	-0.1005	0.0355	0.03	0.063	1
YKL008C	LAC1	0.146671	0.576805	-0.006	0.244	0.027	0.059	-0.122	0.019	-0.121	0.067	-0.064	0.1315	-0.047	0.063	1
YBL101C	ECM21	0.658228	-0.324177	-0.384	-0.348	-0.611	-0.109	-0.327	0.108	0.574	0.234	-0.3555	-0.12	-0.0185	0.0625	1
YMR036C	MIH1	0.429605	-0.347579	0.061	-0.256	0.153	0.356	0.156	-0.099	-0.447	-0.231	0.1085	-0.1775	-0.147	0.0625	1
YMR222C	FSH2	0.576774	-0.960482	0.041	0.078	0.2	0.604	-0.007	-0.151	-0.121	-0.479	0.017	-0.0365	0.0395	0.0625	1
YDR535C	YDR535C	0.258322	0.082877	0.245	-0.255	-0.007	-0.131	0.133	-0.021	-0.232	0.255	0.189	-0.138	-0.1195	0.062	1
YEL023C	YEL023C	0.254491	0.354242	-0.134	0.039	-0.105	0.213	-0.04	-0.122	-0.469	-0.09	-0.087	-0.0415	-0.287	0.0615	1
YOR317W	FAA1	0.363075	0.490774	-0.038	-0.07	0.116	-0.198	0.083	0.161	0.553	0.32	0.0225	0.0455	0.3345	0.061	1
YOL048C	YOL048C	0.38679	-0.156754	-0.059	-0.517	0.074	0.294	0.23	0.001	0.24	-0.174	0.0855	-0.258	0.157	0.06	1
YML035C-A	YML034C-A	0.204384	0.561749	0.216	0.138	0.501	0.229	0.223	0.079	0.282	-0.111	0.2195	0.1085	0.3915	0.059	1
YBR010W	HHT1	0.218924	-0.324136	0.093	0.036	0.318	-0.06	-0.126	-0.023	0.028	0.177	-0.0165	0.0065	0.173	0.0585	1
YKL114C	APN1	0.164504	0.537482	-0.279	-0.025	-0.398	0.022	-0.117	-0.197	-0.181	0.095	-0.198	-0.111	-0.2895	0.0585	1
YKR069W	MET1	0.138854	0.484502	-0.011	0.118	0.292	0.171	0.017	0.07	0.139	-0.054	0.003	0.094	0.2155	0.0585	1
YCL035C	GRX1	0.134742	0.584767	0.165	0.173	-0.073	0.081	-0.05	0.018	-0.089	0.035	0.0575	0.0955	-0.081	0.058	1
YGL039W	YGL039W	0.353319	-0.132581	0.077	0.112	0.444	0.395	0.043	0.101	0.238	-0.28	0.06	0.1065	0.341	0.0575	1
YIL025C	YIL025C	0.33254	-0.854898	0.22	0.335	0.054	0.234	-0.111	-0.109	-0.051	-0.119	0.0545	0.113	0.0015	0.0575	1
YGL229C	SAP4	0.330829	-0.359722	0.141	0.473	-0.105	0.07	-0.202	-0.084	-0.009	0.044	-0.0305	0.1945	-0.057	0.057	1
YJR103W	URA8	0.19822	-0.756858	0.065	0.022	0.231	-0.115	0.063	0.018	0.034	0.229	0.064	0.02	0.1325	0.057	1
YER155C	BEM2	0.739255	0.92502	-0.208	-0.02	0.062	0.416	-0.868	-0.908	-0.605	-0.303	-0.538	-0.464	-0.2715	0.0565	1
YNL301C	RPL18B	0.157609	-0.351094	0.2	0.115	0.135	0.193	0.091	0.023	0.202	-0.08	0.1455	0.069	0.1685	0.0565	1
YGR232W	NAS6	0.35524	0.102544	0.077	-0.157	-0.063	0.333	0.053	-0.104	-0.504	-0.221	0.065	-0.1305	-0.2835	0.056	1
YMR155W	YMR155W	0.199603	-0.79828	-0.003	0.019	-0.009	0.248	0.095	-0.022	-0.034	-0.136	0.046	-0.0015	-0.0215	0.056	1
YJR087W	YJR087W	0.303412	0.037759	0.217	0.246	0.162	0.049	0.034	0.07	-0.389	0.062	0.1255	0.158	-0.1135	0.0555	1
YKL204W	EAP1	0.686538	-0.814483	0.107	0.237	0.377	0.491	0.036	-0.167	-0.602	-0.38	0.0715	0.035	-0.1125	0.0555	1
YFL021W	GAT1	0.262295	-0.029543	0.028	-0.345	0.348	0.105	0.075	-0.061	-0.079	0.005	0.0515	-0.203	0.1345	0.055	1
YHL041W	YHL041W	0.766255	0.260554	-0.168	-0.925	-0.543	-0.275	0.214	0.239	0.099	0.385	0.023	-0.343	-0.222	0.055	1
YOR316C	COT1	0.442153	-0.773154	0.114	0.265	0.115	0.486	0.14	0.151	-0.044	-0.376	0.127	0.208	0.0355	0.055	1
YDR480W	DIG2	0.160262	0.243495	0.047	0.091	0.076	0.167	-0.076	-0.018	-0.081	-0.059	-0.0145	0.0365	-0.0025	0.054	1
YMR243C	ZRC1	0.263787	0.167297	0.122	-0.254	0.469	-0.032	0.22	0.011	0.058	0.14	0.171	-0.1215	0.2635	0.054	1
YGR014W	MSB2	0.480141	-0.762951	0.07	-0.055	0.239	0.416	0.026	-0.069	-0.389	-0.309	0.048	-0.062	-0.075	0.0535	1
YHR032W	YHR032W	0.459525	-0.952265	-0.017	-0.182	0.307	0.437	-0.051	-0.01	-0.168	-0.33	-0.034	-0.096	0.0695	0.0535	1
YGR042W	YGR042W	0.320832	0.90839	0.092	-0.616	0.087	0.012	0.198	0.006	0.17	0.094	0.145	-0.305	0.1285	0.053	1
YER001W	MNN1	0.279835	-0.98956	-0.026	-0.034	0.196	0.289	0.015	0.027	-0.094	-0.184	-0.0055	-0.0035	0.051	0.0525	1
YBR242W	YBR242W	0.262687	0.115231	-0.009	0.245	-0.118	0.266	-0.01	-0.052	-0.186	-0.162	-0.0095	0.0965	-0.152	0.052	1
YNL236W	SIN4	0.525796	-0.439734	-0.086	-0.593	-0.492	-0.141	-0.441	0.217	-0.074	0.245	-0.2635	-0.188	-0.283	0.052	1
YDL066W	IDP1	0.539335	-0.185037	0.243	0.243	0.626	0.186	-0.177	-0.264	-0.185	-0.083	0.033	-0.0105	0.2205	0.0515	1
YOR196C	LIP5	0.462543	0.623729	-0.233	-1.065	-1.047	-0.225	-0.527	-0.962	-0.374	0.328	-0.38	-1.0135	-0.7105	0.0515	1
YAL028W	FRT2	0.427212	-0.976765	-0.106	-0.2	-0.012	0.419	0.162	0.137	-0.014	-0.319	0.028	-0.0315	-0.013	0.05	1
YKL217W	JEN1	0.37261	-0.652549	0.138	0.235	0.47	0.274	0.118	0.054	-0.097	-0.174	0.128	0.1445	0.1865	0.05	1
YKL067W	YNK1	0.190967	-0.256357	0.031	0.026	0.008	-0.049	0.076	0.034	0.332	0.148	0.0535	0.03	0.17	0.0495	1
YNR012W	URK1	0.373955	-0.277912	0.066	0.128	0.471	-0.307	0.182	0.011	0.312	0.405	0.124	0.0695	0.3915	0.049	1
YLR363C	NMD4	0.253747	-0.49521	0.146	0.133	0.35	-0.189	0.054	0.164	0.2	0.286	0.1	0.1485	0.275	0.0485	1
YNL279W	PRM1	0.215027	0.236519	0.028	0.215	0.101	0.153	-0.024	-0.004	-0.2	-0.056	0.002	0.1055	-0.0495	0.0485	1
YCL023C	YCL023C	0.238343	-0.548328	0.208	0.078	0.166	0.282	0.152	0.043	0.104	-0.186	0.18	0.0605	0.135	0.048	1
YJL048C	UBX6	0.307343	-0.087472	0.185	0.323	0.218	0.129	0.002	-0.036	-0.217	-0.033	0.0935	0.1435	0.0005	0.048	1
YDR220C	YDR220C	0.209249	0.888166	-0.04	0.081	-0.493	0.125	-0.09	-0.089	-0.147	-0.03	-0.065	-0.004	-0.32	0.0475	1
YLR063W	YLR063W	0.413595	0.222159	0.194	0.331	0.232	0.261	-0.01	-0.016	-0.351	-0.166	0.092	0.1575	-0.0595	0.0475	1
YOR163W	DDP1	0.301034	-0.117101	0.114	0.217	0.3	0.082	-0.226	0.007	-0.145	0.013	-0.056	0.112	0.0775	0.0475	1
YIL114C	POR2	0.164598	-0.782838	-0.026	0.144	0.148	-0.028	0.012	-0.01	-0.099	0.121	-0.007	0.067	0.0245	0.0465	1
YIR039C	YPS6	0.29035	-0.378107	0.093	-0.374	0.106	0.177	0.177	0.076	-0.138	-0.084	0.135	-0.149	-0.016	0.0465	1
YKR054C	DYN1	0.656621	0.426018	0.016	-0.82	0.174	-0.337	0.241	0.202	0.377	0.43	0.1285	-0.309	0.2755	0.0465	1
YLR461W	PAU4	0.49856	-0.709856	0.051	0.075	0.357	0.529	0.036	0.039	0.109	-0.436	0.0435	0.057	0.233	0.0465	1
YBR203W	COS111	0.222644	-0.654558	0.079	-0.134	0.381	0.059	-0.027	0.049	-0.01	0.033	0.026	-0.0425	0.1855	0.046	1
YER152C	YER152C	0.260705	0.774529	0.18	0.289	0.37	0.157	0.008	-0.012	0.05	-0.065	0.094	0.1385	0.21	0.046	1
YMR310C	YMR310C	0.550413	-0.577116	0.031	-0.708	0.188	0.401	0.162	0.118	0.097	-0.309	0.0965	-0.295	0.1425	0.046	1
YGR164W	YGR164W	1.34149	0.411463	-0.102	-1.667	0.219	-0.868	0.864	0.037	0.373	0.959	0.381	-0.815	0.296	0.0455	0
YIL120W	QDR1	0.339562	-0.947393	0.05	0.094	-0.149	0.347	-0.11	-0.026	0.091	-0.256	-0.03	0.034	-0.029	0.0455	1
YJR094C	IME1	0.189561	-0.575582	-0.072	0.03	0.154	0.219	0.061	0.086	0.104	-0.128	-0.0055	0.058	0.129	0.0455	1
YPL187W	MF(ALPHA)1	0.142072	-0.174424	-0.044	0.036	-0.028	-0.023	0.04	0.069	0.204	0.114	-0.002	0.0525	0.088	0.0455	1
YLR102C	APC9	0.39337	-0.988684	0.113	0.118	0.29	0.35	0	-0.035	-0.169	-0.26	0.0565	0.0415	0.0605	0.045	1
YDR035W	ARO3	0.131209	-0.057441	0.148	0.234	0.071	0.084	-0.033	0.064	0.102	0.005	0.0575	0.149	0.0865	0.0445	1
YJL083W	TAX4	0.312291	-0.435726	0.097	0.24	0.287	-0.007	-0.236	-0.044	-0.147	0.094	-0.0695	0.098	0.07	0.0435	1
YNL065W	AQR1	0.194917	-0.386042	-0.053	0.066	0.115	0.166	-0.021	0.105	-0.184	-0.079	-0.037	0.0855	-0.0345	0.0435	1
YPL230W	YPL230W	0.696274	-0.494924	0.04	0.098	-0.432	-0.462	0.212	0.487	0.426	0.549	0.126	0.2925	-0.003	0.0435	1
YJL206C	YJL206C	0.246703	-0.792903	0.125	-0.042	-0.087	0.26	0.086	0.02	0.136	-0.174	0.1055	-0.011	0.0245	0.043	1
YMR210W	YMR210W	0.167067	-0.740533	0.04	0.025	-0.189	0.003	-0.082	-0.006	0.11	0.083	-0.021	0.0095	-0.0395	0.043	1
YOR321W	PMT3	0.329281	-0.998377	0.031	0.031	0.035	0.37	0.021	0.035	0.01	-0.288	0.026	0.033	0.0225	0.041	1
YMR101C	SRT1	0.1388	-0.100179	0.098	0.195	0.124	0.147	0.042	0.044	0.051	-0.067	0.07	0.1195	0.0875	0.04	1
YNL198C	YNL198C	0.732413	0.276792	-0.058	-0.33	-0.692	0.629	-0.634	0.07	-1.208	-0.549	-0.346	-0.13	-0.95	0.04	1
YMR196W	YMR196W	0.053742	0.954901	0.031	0.11	0.163	0.071	-0.001	0.042	0.119	0.008	0.015	0.076	0.141	0.0395	1
YJR148W	BAT2	0.22777	0.321616	0.186	-0.04	-0.4	0.076	0.078	0.034	0.03	0.002	0.132	-0.003	-0.185	0.039	1
YOR013W	IRC11	0.571943	-0.39022	0.097	-0.511	0.278	0.555	0.117	-0.154	-0.062	-0.477	0.107	-0.3325	0.108	0.039	1
YGL175C	SAE2	0.548762	0.242402	0.211	-0.799	-0.029	-0.015	0.538	0.238	0.076	0.091	0.3745	-0.2805	0.0235	0.038	1
YGR243W	FMP43	0.403982	-0.80425	0.246	0.159	0.385	0.184	0.029	-0.003	-0.318	-0.108	0.1375	0.078	0.0335	0.038	1
YNL265C	IST1	0.456948	0.332822	0.006	-0.067	0.296	0.431	-0.16	-0.485	0.173	-0.355	-0.077	-0.276	0.2345	0.038	1
YHR123W	EPT1	0.553108	-0.332488	0.079	-0.138	0.217	0.488	-0.534	-0.049	0.049	-0.413	-0.2275	-0.0935	0.133	0.0375	1
YIL020C	HIS6	0.56658	0.256214	0.191	0.307	0.725	0.456	-0.019	-0.102	0.115	-0.381	0.086	0.1025	0.42	0.0375	1
YMR100W	MUB1	0.813384	-0.597742	0.14	0.203	-0.001	0.721	-0.253	-0.383	-0.53	-0.646	-0.0565	-0.09	-0.2655	0.0375	1
YPR014C	YPR014C	0.200443	-0.937568	0.151	-0.037	0.257	0.044	0.018	0.078	-0.103	0.03	0.0845	0.0205	0.077	0.037	1
YFR035C	YFR035C	0.36475	-0.475387	0.166	0.063	-0.07	0.313	-0.13	-0.309	-0.051	-0.24	0.018	-0.123	-0.0605	0.0365	1
YGL016W	KAP122	0.424105	-0.433223	-0.012	0.442	0.096	-0.335	-0.133	0.121	-0.127	0.408	-0.0725	0.2815	-0.0155	0.0365	1
YBR300C	YBR300C	0.719627	-0.119163	0.224	-0.653	-0.194	-0.515	0.192	0.075	0.377	0.587	0.208	-0.289	0.0915	0.036	1
YGR008C	STF2	0.394708	-0.118312	0.135	0.229	0.075	0.288	-0.131	-0.218	-0.239	-0.216	0.002	0.0055	-0.082	0.036	1
YMR291W	YMR291W	0.418434	0.499617	0.026	-0.324	-0.106	0.274	-0.037	-0.439	-0.781	-0.203	-0.0055	-0.3815	-0.4435	0.0355	1
YLR299W	ECM38	0.121859	-0.388345	0.143	0.108	-0.007	0.069	0.14	0.111	0.227	0.001	0.1415	0.1095	0.11	0.035	1
YMR256C	COX7	0.572296	0.67261	-0.607	-0.112	-0.283	0.449	-0.762	-0.844	-0.534	-0.38	-0.6845	-0.478	-0.4085	0.0345	1
YJR095W	SFC1	0.330678	-0.168009	-0.016	0.332	0.213	-0.245	0.013	0.051	0.428	0.313	-0.0015	0.1915	0.3205	0.034	1
YJL106W	IME2	0.438464	0.757715	0.169	0.141	-0.586	0.363	-0.176	-0.295	-0.426	-0.296	-0.0035	-0.077	-0.506	0.0335	1
YLL057C	JLP1	0.451188	0.269047	-0.015	-0.628	-0.454	-0.012	0.102	-0.123	0.279	0.079	0.0435	-0.3755	-0.0875	0.0335	1
YFL041W	FET5	0.368901	-0.99582	0.124	0.038	0.363	-0.15	-0.034	0.08	-0.257	0.215	0.045	0.059	0.053	0.0325	1
YGL241W	KAP114	0.642458	0.176267	0.067	-0.663	-0.359	-0.436	0.169	-0.042	0.255	0.501	0.118	-0.3525	-0.052	0.0325	1
YHR157W	REC104	0.053484	0.863386	0.126	-0.026	-0.138	-0.001	0.058	-0.053	-0.178	0.066	0.092	-0.0395	-0.158	0.0325	1
YPL052W	OAZ1	0.491043	-0.580617	0.13	-0.446	0.172	0.431	0.235	0.102	0.038	-0.366	0.1825	-0.172	0.105	0.0325	1
YBR075W	YBR074W_p	0.964956	-0.414056	0.376	0.162	-0.003	0.743	-0.76	-0.066	-0.603	-0.679	-0.192	0.048	-0.303	0.032	1
YCR022C	YCR022C	0.440398	-0.63846	0.306	0.084	-0.273	0.273	0.231	0.366	0.404	-0.209	0.2685	0.225	0.0655	0.032	1
YKL164C	PIR1	0.132924	-0.739609	0.074	0.137	0.12	-0.078	0.043	-0.008	0.103	0.142	0.0585	0.0645	0.1115	0.032	1
YLR028C	ADE16	0.117751	0.919181	0.001	-0.137	-0.554	0.064	0.045	-0.21	-0.344	0	0.023	-0.1735	-0.449	0.032	1
YFL007W	BLM10	0.66079	0.451874	0.265	0.427	0.256	0.315	-0.086	-0.154	-0.726	-0.252	0.0895	0.1365	-0.235	0.0315	1
YLR221C	RSA3	0.434192	-0.912956	-0.094	-0.067	-0.273	-0.345	0.042	-0.014	0.136	0.407	-0.026	-0.0405	-0.0685	0.031	1
YMR232W	FUS2	0.236182	-0.981233	0.157	0.363	0.147	-0.115	0.096	0.005	0.066	0.176	0.1265	0.184	0.1065	0.0305	1
YNL168C	FMP41	0.197133	-0.199755	-0.049	-0.012	0.005	0.032	0.02	0.018	-0.382	0.028	-0.0145	0.003	-0.1885	0.03	1
YDR285W	ZIP1	0.517134	0.138034	0.113	-0.888	-0.118	-0.136	0.162	-0.17	-0.783	0.195	0.1375	-0.529	-0.4505	0.0295	1
YPR138C	MEP3	0.169318	-0.607715	-0.105	-0.043	-0.023	0.182	-0.03	-0.102	-0.135	-0.123	-0.0675	-0.0725	-0.079	0.0295	1
YGL157W	YGL157W	0.095883	0.51131	0.072	0.014	-0.153	-0.039	-0.058	0.039	-0.185	0.096	0.007	0.0265	-0.169	0.0285	1
YOR212W	STE4	0.390432	0.283774	0.033	-0.094	0.156	0.346	-0.225	-0.354	-0.113	-0.289	-0.096	-0.224	0.0215	0.0285	1
YHL026C	YHL026C	0.717642	0.93836	-0.747	-0.622	-0.484	-0.329	-0.046	-0.003	0.338	0.385	-0.3965	-0.3125	-0.073	0.028	1
YDR181C	SAS4	0.291428	-0.390682	0.263	0.249	0.097	-0.17	0.022	0.09	-0.221	0.224	0.1425	0.1695	-0.062	0.027	1
YFL044C	OTU1	0.714259	-0.35013	0.054	-0.273	0.107	0.52	-0.173	-0.203	-0.899	-0.466	-0.0595	-0.238	-0.396	0.027	1
YBR012C	YBR012C	0.270134	0.968655	0.317	-0.29	0.015	0.157	-0.073	-0.34	-0.246	-0.106	0.122	-0.315	-0.1155	0.0255	1
YLR266C	PDR8	0.215668	-0.294485	0.065	0.149	0.275	0.2	0.05	0.202	0.029	-0.15	0.0575	0.1755	0.152	0.025	1
YNR056C	BIO5	0.76666	-0.234885	0.302	0.404	0.309	0.551	-0.115	-0.092	-0.599	-0.501	0.0935	0.156	-0.145	0.025	1
YPL192C	PRM3	0.392377	-0.972267	0.073	0.068	-0.037	0.411	0.004	0.079	0.072	-0.363	0.0385	0.0735	0.0175	0.024	1
YGL181W	GTS1	0.643325	-0.915213	0.157	0.196	0.25	0.464	-0.331	-0.355	-0.331	-0.417	-0.087	-0.0795	-0.0405	0.0235	1
YBL098W	BNA4	0.182155	-0.55631	-0.085	0.083	0.201	0.044	-0.023	0.05	-0.154	0.002	-0.054	0.0665	0.0235	0.023	1
YHR155W	YSP1	0.218882	-0.544849	0.008	0.224	-0.202	0.009	-0.094	-0.176	-0.059	0.037	-0.043	0.024	-0.1305	0.023	1
YER067C-A	YER067C-A	0.241443	-0.878707	-0.027	-0.027	0.285	-0.096	-0.004	-0.018	-0.135	0.141	-0.0155	-0.0225	0.075	0.0225	1
YLR262C-A	TMA7	0.318944	0.392146	0.327	-0.38	-0.214	-0.23	0.135	-0.115	0	0.274	0.231	-0.2475	-0.107	0.022	1
YMR230W	RPS10B	0.786251	-0.517804	-0.041	0.354	-1.243	-0.165	0.097	-0.386	0.086	0.209	0.028	-0.016	-0.5785	0.022	1
YOR097C	YOR097C	0.226666	-0.197291	0.295	0.225	0.032	0.208	0.074	0.121	0.114	-0.165	0.1845	0.173	0.073	0.0215	1
YOR179C	SYC1	0.177121	0.505458	-0.017	0.113	-0.017	0.078	0.013	-0.001	-0.331	-0.036	-0.002	0.056	-0.174	0.021	1
YFL052W	YFL052W	0.336213	-0.767226	0.064	0.014	0.207	0.192	0.054	-0.071	-0.365	-0.151	0.059	-0.0285	-0.079	0.0205	1
YGR228W	YGR228W	0.178496	0.309516	0.066	-0.339	-0.203	-0.001	-0.006	0.008	-0.202	0.042	0.03	-0.1655	-0.2025	0.0205	1
YGL021W	ALK1	0.260667	-0.801748	0.154	0.163	0.267	-0.111	0.043	-0.13	-0.057	0.151	0.0985	0.0165	0.105	0.02	1
YGL208W	SIP2	0.316976	0.994063	0.2	0.24	0.106	0.167	0.008	0.12	-0.408	-0.127	0.104	0.18	-0.151	0.02	1
YDR383C	NKP1	0.218544	0.461893	0.13	-0.363	0.185	0.037	0.212	0.062	0.136	0.001	0.171	-0.1505	0.1605	0.019	1
YBR099C	YBR099C	0.21673	-0.919358	0.049	0.153	-0.049	0.197	0.07	0.007	0.144	-0.162	0.0595	0.08	0.0475	0.0175	1
YIR002C	MPH1	0.133441	-0.644301	0.158	0.129	0.201	-0.03	0.064	0.042	-0.013	0.065	0.111	0.0855	0.094	0.0175	1
YNL300W	YNL300W	0.341056	0.594026	0.193	0.132	-0.052	0.27	0.078	0.03	-0.484	-0.235	0.1355	0.081	-0.268	0.0175	1
YOR084W	YOR084W	0.262781	0.200801	-0.025	0.069	0.273	0.258	-0.056	-0.114	0.171	-0.223	-0.0405	-0.0225	0.222	0.0175	1
YBL011W	SCT1	0.22139	-0.992143	0.043	0.135	0.137	-0.142	0.034	-0.084	-0.081	0.175	0.0385	0.0255	0.028	0.0165	1
YEL059W	YEL059W	1.20231	-0.225098	2.117	0.77	-0.217	0.352	0.07	-0.064	0.451	-0.319	1.0935	0.353	0.117	0.0165	0
YJR047C	ANB1	0.535333	0.463899	0.267	0.541	0.669	0.227	-0.022	-0.173	0.056	-0.194	0.1225	0.184	0.3625	0.0165	1
YLL048C	YBT1	0.612627	-0.183216	0.137	0.143	-1.007	0.432	0.095	-0.117	-0.146	-0.399	0.116	0.013	-0.5765	0.0165	1
YOR247W	SRL1	0.198928	0.233477	0.097	-0.142	0.19	-0.152	-0.066	-0.024	0.26	0.184	0.0155	-0.083	0.225	0.016	1
YOR385W	YOR385W	0.165105	-0.51341	-0.005	0.004	-0.06	-0.12	-0.055	-0.069	-0.225	0.152	-0.03	-0.0325	-0.1425	0.016	1
YIL168W	YIL168W	0.181481	-0.820273	0.081	0.045	0.116	-0.16	0.06	0.135	0.116	0.191	0.0705	0.09	0.116	0.0155	1
YOR016C	ERP4	0.3175	-0.58035	0.072	0.369	0.16	-0.144	-0.092	-0.027	-0.185	0.173	-0.01	0.171	-0.0125	0.0145	1
YHR114W	BZZ1	0.379629	-0.63329	0.111	0.108	-0.364	0.319	0.123	-0.02	0.068	-0.292	0.117	0.044	-0.148	0.0135	1
YNR066C	YNR066C	0.423255	-0.827989	0.153	0.027	0.553	0.14	0.117	0.084	-0.252	-0.113	0.135	0.0555	0.1505	0.0135	1
YAR002C-A	ERP1	0.301322	-0.782908	0.131	0.035	0.192	-0.193	0.107	0.066	-0.247	0.218	0.119	0.0505	-0.0275	0.0125	1
YER180C	ISC10	0.34439	-0.980829	0.103	0.072	0.141	0.348	0.14	0.099	-0.003	-0.324	0.1215	0.0855	0.069	0.012	1
YGL180W	ATG1	0.526131	0.775017	-0.01	0.425	-0.357	0.365	-0.102	-0.045	-0.973	-0.341	-0.056	0.19	-0.665	0.012	1
YNL288W	CAF40	0.446469	-0.32366	-0.37	-0.087	-0.594	0.379	-0.245	-0.504	-0.334	-0.356	-0.3075	-0.2955	-0.464	0.0115	1
YBL054W	YBL054W	0.770896	-0.496651	0.262	0.233	0.391	0.535	-0.195	-0.473	-0.365	-0.513	0.0335	-0.12	0.013	0.011	1
YJR124C	YJR124C	0.297564	-0.553563	0.198	0.233	0.466	-0.022	0.027	0.143	-0.093	0.044	0.1125	0.188	0.1865	0.011	1
YPR090W	YPR089W_p	0.127866	0.62302	-0.033	-0.012	0.313	-0.088	-0.016	0.013	0.154	0.11	-0.0245	0.0005	0.2335	0.011	1
YOR094W	ARF3	0.251687	-0.32983	0.043	0.168	-0.331	0.149	0.119	0.075	0.069	-0.132	0.081	0.1215	-0.131	0.0085	1
YLR092W	SUL2	0.215261	0.222423	0.187	-0.071	0.398	-0.158	0.126	0.012	0.144	0.174	0.1565	-0.0295	0.271	0.008	1
YPR154W	PIN3	0.450849	-0.229414	0.177	0.018	0.154	0.306	0.068	-0.107	-0.502	-0.29	0.1225	-0.0445	-0.174	0.008	1
YCL012W	BUD3_p	0.100297	0.886373	0.206	0.068	-0.155	0.009	0.082	-0.085	-0.193	0.006	0.144	-0.0085	-0.174	0.0075	1
YJR061W	YJR061W	0.345657	-0.456928	0.334	-0.008	-0.124	-0.219	-0.085	-0.307	-0.036	0.234	0.1245	-0.1575	-0.08	0.0075	1
YKR047W	YKR047W	0.39857	-0.765842	0.067	0.182	0.204	0.308	0.15	0.136	-0.311	-0.293	0.1085	0.159	-0.0535	0.0075	1
YLL063C	AYT1	0.090728	-0.05656	-0.024	-0.037	-0.112	0.094	0.014	-0.005	-0.089	-0.079	-0.005	-0.021	-0.1005	0.0075	1
YAR040C	YAR040C	0.316704	-0.477807	0.004	-0.317	-0.096	0.258	0.145	0.029	-0.194	-0.244	0.0745	-0.144	-0.145	0.007	1
YBL096C	YBL096C	0.371099	-0.608347	0.061	-0.443	0.225	0.165	0.101	0.036	-0.244	-0.151	0.081	-0.2035	-0.0095	0.007	1
YMR082C	YMR082C	0.215655	-0.51493	0.003	0.179	0.285	-0.09	-0.012	-0.103	0.023	0.104	-0.0045	0.038	0.154	0.007	1
YOL070C	NBA1	0.15884	-0.175973	-0.211	-0.076	-0.236	0.137	-0.123	-0.177	-0.112	-0.123	-0.167	-0.1265	-0.174	0.007	1
YPR021C	AGC1	0.649723	0.044959	0.143	-0.857	0.157	-0.298	0.339	0.272	0.225	0.311	0.241	-0.2925	0.191	0.0065	1
YBR187W	GDT1	0.385167	0.014442	-0.258	-0.052	0.086	-0.367	-0.262	-0.08	0.276	0.379	-0.26	-0.066	0.181	0.006	1
YNL253W	TEX1	0.607315	-0.70384	0.145	0.358	0.087	0.586	-0.001	0.087	-0.1	-0.574	0.072	0.2225	-0.0065	0.006	1
YMR103C	YMR103C	0.325231	-0.894715	-0.061	0.06	0.27	0.072	-0.079	-0.114	-0.342	-0.062	-0.07	-0.027	-0.036	0.005	1
YGR133W	PEX4	0.445251	-0.113244	-0.294	-0.481	-0.259	0.06	0.168	0.084	-0.757	-0.051	-0.063	-0.1985	-0.508	0.0045	1
YGR279C	SCW4	0.569638	-0.095625	0.407	0.4	0.548	0.249	0.272	-0.131	-0.323	-0.24	0.3395	0.1345	0.1125	0.0045	1
YMR176W	ECM5	0.090225	0.517632	0.178	0.067	0.076	0.021	0.109	0.108	-0.082	-0.013	0.1435	0.0875	-0.003	0.004	1
YBL086C	YBL086C	0.616993	-0.841555	0.172	0.178	-0.578	-0.446	0.002	0.021	0.235	0.453	0.087	0.0995	-0.1715	0.0035	1
YER170W	ADK2	0.255485	-0.284155	0.133	0.239	0.219	0.242	0.053	0.084	0.163	-0.235	0.093	0.1615	0.191	0.0035	1
YDR399W	HPT1	0.05986	0.858338	-0.017	-0.051	0.237	0.039	-0.039	0.042	0.241	-0.033	-0.028	-0.0045	0.239	0.003	1
YEL038W	UTR4	0.28036	0.533433	0.145	-0.555	-0.517	0.068	-0.046	-0.05	-0.443	-0.064	0.0495	-0.3025	-0.48	0.002	1
YMR315W	YMR315W	0.349282	-0.275198	0.228	0.012	0.408	0.255	0.076	0.014	-0.049	-0.251	0.152	0.013	0.1795	0.002	1
YJL112W	MDV1	0.171964	-0.330797	0.002	-0.075	0.157	0.087	0.026	-0.113	-0.138	-0.084	0.014	-0.094	0.0095	0.0015	1
YOR280C	FSH3	0.335737	-0.853946	0.178	0.374	0.357	-0.04	0.048	-0.078	-0.115	0.043	0.113	0.148	0.121	0.0015	1
YDR111C	ALT2	0.436353	0.366679	0.01	-0.623	-0.776	0.209	0.188	-0.109	-0.235	-0.207	0.099	-0.366	-0.5055	0.001	1
YKL075C	YKL075C	0.227314	0.796547	0.176	0.495	0.008	0.187	0.191	0.326	-0.187	-0.187	0.1835	0.4105	-0.0895	0	1
YER028C	MIG3	0.33821	-0.852752	0.058	0.162	0.363	0.145	0.019	-0.028	-0.216	-0.146	0.0385	0.067	0.0735	-0.0005	1
YGR017W	YGR017W	0.188987	0.835447	0.157	-0.05	0.163	0.063	-0.035	-0.206	-0.093	-0.064	0.061	-0.128	0.035	-0.0005	1
YHR049C-A	YHR049C-A	0.429053	-0.933306	0.048	0.18	0.498	-0.083	0.056	0.044	-0.333	0.082	0.052	0.112	0.0825	-0.0005	1
YOR263C	YOR263C	0.175494	-0.06445	0.127	0.335	0.168	-0.017	0.091	-0.007	0.23	0.016	0.109	0.164	0.199	-0.0005	1
YOR141C	ARP8	1.64134	-0.74224	1.239	0.373	0.398	0.876	-1.249	1.019	-0.647	-0.878	-0.005	0.696	-0.1245	-0.001	0
YDL093W	PMT5	0.463802	-0.984133	0.095	0.198	0.305	0.377	0.105	-0.029	-0.179	-0.381	0.1	0.0845	0.063	-0.002	1
YFL027C	GYP8	0.079516	0.858076	0.034	0.061	0.291	0.05	-0.031	0.096	0.196	-0.054	0.0015	0.0785	0.2435	-0.002	1
YIR031C	DAL7	0.380792	-0.816501	-0.018	-0.145	0.111	0.297	0.085	0.019	-0.319	-0.301	0.0335	-0.063	-0.104	-0.002	1
YML104C	MDM1	0.348914	-0.406985	-0.024	0.143	0.094	0.275	-0.059	0.026	-0.311	-0.28	-0.0415	0.0845	-0.1085	-0.0025	1
YOR381W	FRE3	0.208794	-0.591727	0.113	-0.069	0.259	0.089	0.134	0.172	-0.028	-0.094	0.1235	0.0515	0.1155	-0.0025	1
YPR017C	DSS4	0.276043	-0.319992	0.189	0.165	0.385	0.113	0.086	0.138	-0.105	-0.118	0.1375	0.1515	0.14	-0.0025	1
YOL125W	TRM13	0.390309	-0.544277	0.141	0.027	-0.461	0.301	0.026	-0.166	-0.026	-0.307	0.0835	-0.0695	-0.2435	-0.003	1
YDR509W	YDR509W	0.262499	-0.789678	0.15	-0.094	0.254	-0.123	-0.097	-0.068	-0.142	0.116	0.0265	-0.081	0.056	-0.0035	1
YER097W	YER097W	0.280283	-0.418926	0.32	-0.042	0.177	0.077	-0.025	0.083	-0.215	-0.084	0.1475	0.0205	-0.019	-0.0035	1
YGR096W	TPC1	2.05058	-0.129085	-0.149	-1.884	-0.547	-1.663	0.685	0.119	0.5	1.656	0.268	-0.8825	-0.0235	-0.0035	0
YBL095W	YBL095W	0.234373	-0.797478	0.14	0.13	0.199	-0.196	-0.064	0.021	0.062	0.188	0.038	0.0755	0.1305	-0.004	1
YBR118W	TEF2	0.318308	-0.405394	0.236	-0.269	0.221	-0.171	-0.134	-0.161	-0.16	0.163	0.051	-0.215	0.0305	-0.004	1
YDR340W	YDR340W	0.298497	-0.379481	-0.068	0.237	-0.049	-0.257	-0.018	0.108	0.236	0.249	-0.043	0.1725	0.0935	-0.004	1
YHR046C	INM1	0.297768	-0.647184	0.003	0.064	-0.021	0.253	-0.213	-0.032	0.165	-0.261	-0.105	0.016	0.072	-0.004	1
YPL116W	HOS3	0.055621	0.911308	0.115	0.046	0.242	-0.021	0.068	-0.025	0.179	0.013	0.0915	0.0105	0.2105	-0.004	1
YOL160W	YOL160W	0.439991	-0.295445	0.089	-0.632	0.089	0.154	0.291	0.092	-0.241	-0.163	0.19	-0.27	-0.076	-0.0045	1
YKR005C	YKR005C	0.520572	0.203081	-0.101	-0.955	0.072	-0.124	0.276	-0.032	-0.113	0.112	0.0875	-0.4935	-0.0205	-0.006	1
YPL201C	YIG1	0.626337	-0.649843	0.326	-0.121	0.655	-0.564	0.113	0.3	0.337	0.552	0.2195	0.0895	0.496	-0.006	1
YIL074C	SER33	0.158273	-0.517921	0.049	0.12	0.145	-0.161	0.021	0.112	0.078	0.147	0.035	0.116	0.1115	-0.007	1
YBR197C	YBR197C	0.288869	-0.536965	-0.027	-0.348	-0.241	0.199	0.006	-0.104	0.078	-0.215	-0.0105	-0.226	-0.0815	-0.008	1
YCL027W	FUS1	0.44768	-0.623067	0.153	-0.365	0.018	0.372	0.165	0.09	-0.112	-0.388	0.159	-0.1375	-0.047	-0.008	1
YAL026C	DRS2	2.26452	-0.739615	-0.416	-1.13	-3.408	-0.129	0.22	0.717	0.671	0.112	-0.098	-0.2065	-1.3685	-0.0085	0
YKR030W	GMH1	0.319385	-0.112287	-0.143	0.09	0.321	0.133	-0.127	-0.243	-0.144	-0.151	-0.135	-0.0765	0.0885	-0.009	1
YBR028C	YBR028C	0.145357	0.77012	0.124	0.28	-0.261	-0.143	0.125	0.188	-0.33	0.124	0.1245	0.234	-0.2955	-0.0095	1
YDR540C	IRC4	0.117967	0.260105	0.168	0.048	0.234	0.029	0.082	0.24	0.16	-0.048	0.125	0.144	0.197	-0.0095	1
YLR429W	CRN1	0.234074	0.53597	-0.115	0.119	-0.127	0.111	-0.13	-0.172	-0.403	-0.13	-0.1225	-0.0265	-0.265	-0.0095	1
YLL053C	YLL053C	0.209182	0.088312	0.081	-0.048	0.158	0.17	0.041	-0.146	-0.027	-0.19	0.061	-0.097	0.0655	-0.01	1
YML018C	YML018C	0.921677	-0.046655	-0.025	-1.64	0.345	0.169	0.487	0.061	0.007	-0.189	0.231	-0.7895	0.176	-0.01	1
YOR092W	ECM3	0.213832	0.484609	-0.073	-0.083	-0.344	-0.171	-0.009	0.037	-0.095	0.149	-0.041	-0.023	-0.2195	-0.011	1
YDL027C	YDL027C	0.422067	-0.708139	0.028	0.159	0.406	0.272	0.071	-0.12	-0.151	-0.296	0.0495	0.0195	0.1275	-0.012	1
YDL001W	RMD1	0.248626	0.382146	0.274	0.302	0.275	0.038	0.247	0.219	-0.204	-0.063	0.2605	0.2605	0.0355	-0.0125	1
YHR096C	HXT5	0.489104	0.112789	0.029	-0.904	0.019	0.349	0.158	-0.279	-0.145	-0.374	0.0935	-0.5915	-0.063	-0.0125	1
YJL150W	YJL150W	0.415371	0.609979	-0.031	0.105	-0.184	0.242	-0.072	-0.178	-0.775	-0.267	-0.0515	-0.0365	-0.4795	-0.0125	1
YPL018W	CTF19	0.817668	-0.114188	0.354	0.098	0.123	0.639	0.121	-0.174	-0.798	-0.664	0.2375	-0.038	-0.3375	-0.0125	1
YBR076W	ECM8	0.385726	-0.662509	-0.287	-0.361	-0.125	-0.216	0.171	0.108	-0.149	0.19	-0.058	-0.1265	-0.137	-0.013	1
YJR066W	TOR1	0.322977	0.258692	-0.047	0.043	0.024	-0.243	0.075	0.209	0.428	0.217	0.014	0.126	0.226	-0.013	1
YMR182C	RGM1	0.368447	-0.112313	0.043	0.363	0.099	0.047	0.071	-0.125	-0.439	-0.074	0.057	0.119	-0.17	-0.0135	1
YKL161C	YKL161C	0.183726	-0.558355	-0.092	0.133	-0.075	0.124	0.063	0.077	0.103	-0.152	-0.0145	0.105	0.014	-0.014	1
YKR080W	MTD1	0.237193	0.245914	0.035	0.253	-0.053	0.114	0.104	-0.079	-0.264	-0.142	0.0695	0.087	-0.1585	-0.014	1
YML010C-B	YML009C-A	1.04861	-0.969332	-0.245	-0.116	-0.644	0.845	-0.138	0.014	0.547	-0.873	-0.1915	-0.051	-0.0485	-0.014	1
YPR130C	YPR130C	0.534306	0.901256	0.242	0.119	-1.078	-0.245	0.176	0.21	-0.121	0.217	0.209	0.1645	-0.5995	-0.014	1
YDL215C	GDH2	0.362493	-0.815152	0.223	0.194	0.267	0.329	0.055	0.108	0.138	-0.359	0.139	0.151	0.2025	-0.015	1
YDR538W	PAD1	0.252158	-0.099141	0.191	0.13	0.414	0.054	0.11	0.047	-0.057	-0.084	0.1505	0.0885	0.1785	-0.015	1
YOL119C	MCH4	0.318359	-0.944407	-0.069	-0.016	-0.095	0.285	0.033	0.102	0.046	-0.316	-0.018	0.043	-0.0245	-0.0155	1
YLR003C	YLR003C	0.281358	0.13708	0.108	0.216	0.357	0.213	0.073	0.026	0.095	-0.246	0.0905	0.121	0.226	-0.0165	1
YKR046C	PET10	0.334143	-0.740247	0.123	0.175	0.314	-0.295	0.056	-0.103	0.078	0.261	0.0895	0.036	0.196	-0.017	1
YNL227C	JJJ1	0.962055	0.52598	0.13	0.197	-0.282	0.599	-1.037	-0.299	-1.038	-0.635	-0.4535	-0.051	-0.66	-0.018	1
YLR011W	LOT6	0.143982	-0.13523	-0.138	0.016	-0.042	0.075	-0.005	0.048	-0.213	-0.112	-0.0715	0.032	-0.1275	-0.0185	1
YML072C	TCB3	0.174254	0.754049	-0.026	-0.027	-0.145	0.054	0.045	-0.176	-0.415	-0.092	0.0095	-0.1015	-0.28	-0.019	1
YOR344C	TYE7	0.210987	-0.362104	0.215	0.115	0.222	-0.096	-0.028	0.236	-0.062	0.058	0.0935	0.1755	0.08	-0.019	1
YDL054C	MCH1	0.326704	0.348462	-0.256	-0.366	0.124	-0.107	0.293	-0.062	0.174	0.068	0.0185	-0.214	0.149	-0.0195	1
YCL049C	YCL049C	0.081572	0.876577	0.152	0.141	0.245	-0.04	0.102	0.137	0.395	0	0.127	0.139	0.32	-0.02	1
YNR072W	HXT17	2.53461	-0.297595	1.752	0.895	1.964	1.797	-0.567	-0.391	-0.371	-1.838	0.5925	0.252	0.7965	-0.0205	0
YOL087C	YOL087C	0.366676	0.678716	0.485	0.378	0.397	0.313	0.323	0.201	0.585	-0.354	0.404	0.2895	0.491	-0.0205	1
YOR357C	SNX3	0.113468	0.517295	0.082	0.044	0.132	-0.104	0.025	0.045	0.277	0.061	0.0535	0.0445	0.2045	-0.0215	1
YGL036W	YGL036W	0.267715	-0.598861	-0.128	0.366	0.099	0.006	0.034	-0.141	0.115	-0.05	-0.047	0.1125	0.107	-0.022	1
YNL053W	MSG5	0.159478	-0.068593	0.058	0.049	-0.062	-0.017	0.063	-0.269	-0.084	-0.027	0.0605	-0.11	-0.073	-0.022	1
YOR264W	DSE3	0.414017	0.738212	-0.041	0.344	-0.073	0.005	-0.019	0.92	0.519	-0.049	-0.03	0.632	0.223	-0.022	1
YIL135C	VHS2	0.228823	-0.577837	-0.14	-0.255	-0.368	0.086	0.003	-0.084	-0.033	-0.132	-0.0685	-0.1695	-0.2005	-0.023	1
YKR001C	VPS1	0.373835	0.507766	-0.338	-0.312	-0.506	0.117	-0.733	-0.864	-0.365	-0.163	-0.5355	-0.588	-0.4355	-0.023	1
YMR074C	YMR074C	0.498212	-0.62017	0.128	-0.033	-0.242	0.471	0.035	-0.095	-0.177	-0.517	0.0815	-0.064	-0.2095	-0.023	1
YDR222W	YDR222W	1.03818	0.503114	0.06	-0.197	0.294	0.652	-0.699	-0.901	-0.893	-0.701	-0.3195	-0.549	-0.2995	-0.0245	1
YLR109W	AHP1	0.343209	-0.09711	0.175	-0.131	-0.193	0.312	0.05	-0.127	-0.244	-0.361	0.1125	-0.129	-0.2185	-0.0245	1
YGR131W	YGR131W	0.108385	-0.072441	0.076	-0.074	0.017	0.041	0.016	0.004	0.158	-0.091	0.046	-0.035	0.0875	-0.025	1
YIL145C	PAN6	0.447376	-0.615264	-0.348	-0.643	-0.053	-0.098	0.12	0.078	-0.254	0.048	-0.114	-0.2825	-0.1535	-0.025	1
YHR080C	YHR080C	0.17338	-0.1439	0.116	0.305	-0.026	-0.069	0.035	0.078	0.208	0.017	0.0755	0.1915	0.091	-0.026	1
YAL007C	ERP2	0.416834	-0.283916	0.171	-0.089	0.086	0.35	0.309	-0.082	-0.244	-0.403	0.24	-0.0855	-0.079	-0.0265	1
YDL188C	PPH22	0.618551	-0.262327	-0.231	0.082	-0.651	-0.434	0.183	0.178	0.177	0.381	-0.024	0.13	-0.237	-0.0265	1
YGR209C	TRX2	0.504443	-0.652904	-0.109	-0.518	-0.294	0.42	-0.218	-0.249	0.075	-0.473	-0.1635	-0.3835	-0.1095	-0.0265	1
YNR049C	MSO1	0.446454	-0.720526	0.089	0.224	0.291	0.146	0.144	0.064	-0.515	-0.199	0.1165	0.144	-0.112	-0.0265	1
YHR086W	NAM8	0.374227	-0.705734	-0.277	0.096	0.025	0.232	0.003	-0.142	-0.371	-0.286	-0.137	-0.023	-0.173	-0.027	1
YCR075C	ERS1	0.094934	-0.353233	0.063	0.01	-0.012	0.065	0.063	-0.002	0.029	-0.12	0.063	0.004	0.0085	-0.0275	1
YLR151C	PCD1	0.798339	0.918835	-0.209	-0.914	-0.596	-0.402	0.414	0.117	0.137	0.347	0.1025	-0.3985	-0.2295	-0.0275	1
YNL283C	WSC2	0.240718	0.258221	0.069	0.188	-0.115	-0.016	0.012	-0.231	-0.344	-0.039	0.0405	-0.0215	-0.2295	-0.0275	1
YFL031W	HAC1	0.258381	0.515787	0.156	0.216	0.248	0.157	0.009	-0.002	0.001	-0.213	0.0825	0.107	0.1245	-0.028	1
YNL105W	YNL105W	0.353108	-0.633032	0.006	-0.095	-0.131	-0.077	0.134	0.253	0.462	0.021	0.07	0.079	0.1655	-0.028	1
YGR241C	YAP1802	0.178296	-0.120446	0.038	0.166	0.251	-0.11	0.123	0.224	-0.049	0.053	0.0805	0.195	0.101	-0.0285	1
YLR449W	FPR4	0.252134	-0.478071	0.113	0.087	-0.184	-0.11	-0.213	0.183	0.151	0.053	-0.05	0.135	-0.0165	-0.0285	1
YCR101C	YCR101C	0.527465	0.74443	-0.313	-0.658	-0.446	-0.188	0.206	0.035	0.066	0.13	-0.0535	-0.3115	-0.19	-0.029	1
YDR132C	YDR132C	0.253891	0.082475	-0.033	0.377	0.16	0.048	-0.1	-0.102	0.174	-0.106	-0.0665	0.1375	0.167	-0.029	1
YLR375W	STP3	0.171378	0.347007	0.056	0.102	0.244	-0.2	0.038	0.089	0.249	0.142	0.047	0.0955	0.2465	-0.029	1
YPR127W	YPR127W	0.255146	0.119597	-0.009	0.198	0.337	-0.143	-0.207	-0.141	0.104	0.085	-0.108	0.0285	0.2205	-0.029	1
YPL068C	YPL068C	0.186576	0.865993	-0.084	0.489	0.369	0.03	0.024	0.205	0.188	-0.089	-0.03	0.347	0.2785	-0.0295	1
YGL213C	SKI8	0.349657	-0.162387	0.503	-0.141	-0.036	0.13	0.239	0.291	0.325	-0.19	0.371	0.075	0.1445	-0.03	1
YLR183C	TOS4	0.147294	0.391639	0.071	-0.053	-0.293	-0.09	0.08	-0.258	-0.119	0.03	0.0755	-0.1555	-0.206	-0.03	1
YOL014W	YOL014W	0.434915	0.718284	0.212	0.222	-0.686	0.33	-0.013	-0.201	-0.593	-0.39	0.0995	0.0105	-0.6395	-0.03	1
YDR518W	EUG1	0.799487	0.739001	-0.723	-0.268	-0.305	0.623	-1.294	-0.665	-0.909	-0.684	-1.0085	-0.4665	-0.607	-0.0305	1
YLR135W	SLX4	0.280071	-0.782664	0.124	0.021	0.262	-0.008	0.025	0.042	-0.287	-0.054	0.0745	0.0315	-0.0125	-0.031	1
YMR172C-A	YMR172C-A	0.162476	0.26984	0.073	-0.055	-0.16	0.13	0.058	-0.089	-0.183	-0.192	0.0655	-0.072	-0.1715	-0.031	1
YDL012C	YDL012C	0.352394	-0.558888	0.009	0.243	0.375	0.151	0.084	0.014	-0.177	-0.215	0.0465	0.1285	0.099	-0.032	1
YGL053W	PRM8	0.415678	-0.919922	0.09	0.037	0.253	0.297	-0.067	-0.091	-0.213	-0.361	0.0115	-0.027	0.02	-0.032	1
YIR020C	YIR020C	0.50821	0.120074	0.133	-0.753	-0.135	-0.21	0.299	-0.052	-0.758	0.145	0.216	-0.4025	-0.4465	-0.0325	1
YMR318C	ADH6	0.083576	0.474173	0.103	0.082	0.134	-0.102	0.079	0.106	0.046	0.036	0.091	0.094	0.09	-0.033	1
YPR148C	YPR148C	0.195371	0.142863	-0.034	0.206	0.335	0.03	0.074	0.032	0.027	-0.096	0.02	0.119	0.181	-0.033	1
YIR021W	MRS1	2.31441	-0.046889	0.886	0.318	2.121	0.86	-1.515	-1.06	-1.13	-0.927	-0.3145	-0.371	0.4955	-0.0335	0
YHR045W	YHR045W	0.338771	-0.813029	-0.021	0.243	0.305	0.087	-0.031	-0.124	-0.21	-0.156	-0.026	0.0595	0.0475	-0.0345	1
YEL040W	UTR2	0.565022	0.293269	0.655	-0.868	0.131	-0.278	0.119	-0.009	0.006	0.208	0.387	-0.4385	0.0685	-0.035	1
YHL044W	YHL044W	0.289193	0.588667	-0.276	-0.6	-0.706	0.11	-0.086	-0.453	-0.267	-0.18	-0.181	-0.5265	-0.4865	-0.035	1
YMR086C-A	YMR086C-A	0.30178	-0.74677	0.052	-0.031	0.189	0.224	-0.079	-0.051	-0.091	-0.294	-0.0135	-0.041	0.049	-0.035	1
YOR071C	THI71	0.242875	-0.957152	0	0.061	0.104	0.15	0.094	0.01	-0.192	-0.22	0.047	0.0355	-0.044	-0.035	1
YGR045C	YGR045C	0.181311	-0.246444	0.118	0.03	-0.098	0.134	-0.008	0.014	-0.077	-0.205	0.055	0.022	-0.0875	-0.0355	1
YLR042C	YLR042C	0.137471	0.732311	0.157	-0.051	0.258	-0.047	0.051	-0.069	0.006	-0.024	0.104	-0.06	0.132	-0.0355	1
YEL056W	HAT2	0.225462	-0.673267	0.205	0.081	0.312	-0.11	-0.007	0.099	-0.057	0.038	0.099	0.09	0.1275	-0.036	1
YER164W	CHD1	1.28689	0.664567	-0.137	0.254	-0.37	0.266	-1.225	-1.472	-1.818	-0.338	-0.681	-0.609	-1.094	-0.036	0
YBR098W	MMS4	0.933973	-0.815213	-0.468	-0.359	-1.16	0.061	-0.318	-0.035	0.663	-0.135	-0.393	-0.197	-0.2485	-0.037	1
YDR043C	NRG1	0.15945	0.772353	0.054	0.077	-0.201	-0.08	0.072	0.328	-0.025	0.006	0.063	0.2025	-0.113	-0.037	1
YMR231W	PEP5	1.59552	0.30784	-1.672	-0.947	-1.174	-0.225	-0.476	1.752	-0.022	0.15	-1.074	0.4025	-0.598	-0.0375	0
YBR233W	PBP2	0.710332	0.035718	0.352	0.403	1.132	0.15	-0.03	0.023	-0.127	-0.228	0.161	0.213	0.5025	-0.039	1
YDR077W	SED1	0.120048	0.76868	-0.1	-0.114	0.185	-0.095	-0.242	-0.257	0.118	0.017	-0.171	-0.1855	0.1515	-0.039	1
YGL126W	SCS3	1.22987	0.309185	-0.858	-1.343	-0.907	-0.552	-0.42	-0.032	0.85	0.474	-0.639	-0.6875	-0.0285	-0.039	0
YIR018W	YAP5	0.321986	0.282516	0.286	0.211	-0.383	0.218	0.079	-0.019	-0.149	-0.296	0.1825	0.096	-0.266	-0.039	1
YJL066C	MPM1	0.168607	0.211301	-0.155	0.092	-0.075	-0.125	-0.257	-0.04	0.163	0.046	-0.206	0.026	0.044	-0.0395	1
YHL009C	YAP3	0.299879	0.21352	0.164	0.499	0.016	0.169	-0.052	0.16	0.169	-0.249	0.056	0.3295	0.0925	-0.04	1
YLR408C	YLR408C	0.42996	-0.204041	0.019	0.177	0.086	-0.432	0.134	0.277	0.412	0.349	0.0765	0.227	0.249	-0.0415	1
YCR066W	RAD18	1.74008	0.936041	0.866	0.997	0.25	0.749	-0.076	-0.528	-2.279	-0.833	0.395	0.2345	-1.0145	-0.042	0
YMR237W	BCH1	0.165926	-0.146088	0.029	0.031	-0.074	0.119	0.002	0.064	-0.142	-0.203	0.0155	0.0475	-0.108	-0.042	1
YPR172W	YPR172W	0.4151	-0.43192	0.073	-0.64	0.01	0.237	0.046	-0.057	-0.183	-0.321	0.0595	-0.3485	-0.0865	-0.042	1
YLR390W-A	CCW14	0.258611	-0.851598	-0.059	0.067	-0.086	0.204	-0.091	-0.086	-0.092	-0.289	-0.075	-0.0095	-0.089	-0.0425	1
YLR237W	THI7	0.516407	-0.161486	0.096	0.034	-0.018	0.367	0.029	0.055	-0.642	-0.453	0.0625	0.0445	-0.33	-0.043	1
YHR137W	ARO9	0.503503	-0.21967	0.092	0.387	0.065	0.278	-0.011	-0.244	-0.373	-0.365	0.0405	0.0715	-0.154	-0.0435	1
YDR130C	FIN1	0.405431	0.235351	-0.047	-0.647	-0.153	-0.176	0.355	-0.022	-0.343	0.087	0.154	-0.3345	-0.248	-0.0445	1
YMR056C	AAC1	0.492738	-0.933777	-0.105	-0.169	-0.659	0.044	-0.038	-0.153	0.308	-0.133	-0.0715	-0.161	-0.1755	-0.0445	1
YBR214W	SDS24	0.546462	-0.517554	-0.153	-0.209	0.233	-0.569	-0.352	-0.062	0.046	0.479	-0.2525	-0.1355	0.1395	-0.045	1
YBR172C	SMY2	0.902864	-0.850988	0.104	-0.72	0.6	0.543	-0.171	-0.147	-0.613	-0.634	-0.0335	-0.4335	-0.0065	-0.0455	1
YIL016W	SNL1	0.042834	0.957289	-0.027	-0.001	-0.316	-0.027	-0.011	0.066	-0.281	-0.064	-0.019	0.0325	-0.2985	-0.0455	1
YDL056W	MBP1	0.47758	-0.666144	-0.142	0.231	0.25	0.312	0.296	0.304	-0.2	-0.404	0.077	0.2675	0.025	-0.046	1
YKL101W	HSL1	0.446041	0.401823	0.272	0.313	0.288	0.23	0.122	-0.049	-0.293	-0.322	0.197	0.132	-0.0025	-0.046	1
YCR031C	RPS14A	1.3375	0.29232	0.588	0.779	1.456	0.705	-0.172	-0.418	-0.242	-0.799	0.208	0.1805	0.607	-0.047	0
YGR139W	YGR139W	0.294747	-0.565316	0.127	0.201	0.282	-0.024	-0.059	-0.033	-0.224	-0.07	0.034	0.084	0.029	-0.047	1
YOR161C	PNS1	0.501444	0.731363	0.156	-0.604	-0.144	-0.391	0.32	0.021	0.195	0.297	0.238	-0.2915	0.0255	-0.047	1
YAL042W	ERV46	0.328671	0.069907	0.199	-0.197	-0.394	0.216	0.256	0.099	-0.142	-0.311	0.2275	-0.049	-0.268	-0.0475	1
YML117W-A	YML116W-A	0.172069	0.910636	-0.052	-0.416	-0.171	0.079	-0.206	-0.357	-0.336	-0.174	-0.129	-0.3865	-0.2535	-0.0475	1
YER044C-A	MEI4	0.471527	-0.481389	0.05	0.411	0.294	0.281	0.022	-0.13	-0.108	-0.378	0.036	0.1405	0.093	-0.0485	1
YDL226C	GCS1	0.074636	-0.51321	0.036	-0.041	-0.125	-0.009	-0.056	-0.064	-0.042	-0.089	-0.01	-0.0525	-0.0835	-0.049	1
YML107C	PML39	0.250139	0.030437	0.231	0.165	0.329	0.006	0.154	0.112	-0.15	-0.104	0.1925	0.1385	0.0895	-0.049	1
YMR069W	NAT4	0.383621	-0.510821	-0.06	0.024	-0.124	0.315	0.003	-0.081	-0.333	-0.413	-0.0285	-0.0285	-0.2285	-0.049	1
YOL007C	CSI2	0.651464	-0.575049	-0.689	-0.649	-0.703	-0.095	0.085	-0.013	0.125	-0.003	-0.302	-0.331	-0.289	-0.049	1
YOR127W	RGA1	0.16738	0.66202	-0.039	0.35	0.169	-0.077	-0.063	0.206	0.465	-0.021	-0.051	0.278	0.317	-0.049	1
YPR057W	BRR1	1.93589	-0.618577	0.088	1.789	0.351	0.934	-0.752	-1.095	-1.099	-1.032	-0.332	0.347	-0.374	-0.049	0
YFL019C	YFL019C	0.112224	0.883674	0.053	-0.173	-0.139	-0.094	0.091	-0.057	0.027	-0.005	0.072	-0.115	-0.056	-0.0495	1
YMR105C	PGM2	0.527614	-0.642683	0.074	-0.246	0.436	0.055	0.163	-0.122	-0.587	-0.154	0.1185	-0.184	-0.0755	-0.0495	1
YOR347C	PYK2	0.249581	0.89843	0.118	0.001	-0.025	0.055	0.107	-0.139	-0.456	-0.154	0.1125	-0.069	-0.2405	-0.0495	1
YGL090W	LIF1	0.372587	-0.704412	-0.03	0.102	0.113	0.31	-0.103	0.087	-0.064	-0.41	-0.0665	0.0945	0.0245	-0.05	1
YLR428C	YLR428C	0.421101	-0.387983	0.249	0.079	0.283	0.027	0.002	-0.148	-0.474	-0.127	0.1255	-0.0345	-0.0955	-0.05	1
YBL027W	RPL19B	0.114117	0.547792	0.108	-0.187	-0.014	-0.048	0.057	-0.134	-0.23	-0.053	0.0825	-0.1605	-0.122	-0.0505	1
YGL212W	VAM7	0.951844	0.006414	-1.501	-0.29	0.256	-0.497	-1.059	-1.331	-0.988	0.396	-1.28	-0.8105	-0.366	-0.0505	1
YDL137W	ARF2	0.300172	-0.182277	0.045	0.461	0.321	-0.222	-0.026	0	0.158	0.119	0.0095	0.2305	0.2395	-0.0515	1
YIR016W	YIR016W	0.251785	-0.278223	0.104	0.181	0.132	0.189	-0.037	0.175	0.18	-0.292	0.0335	0.178	0.156	-0.0515	1
YPL004C	LSP1	0.109729	-0.092029	0.043	-0.02	-0.175	-0.132	-0.001	-0.069	-0.04	0.028	0.021	-0.0445	-0.1075	-0.052	1
YDR198C	RKM2	0.775226	0.632622	0.17	-0.944	-0.131	-0.617	0.46	-0.029	0.325	0.512	0.315	-0.4865	0.097	-0.0525	1
YDR317W	HIM1	0.341089	0.640276	0.016	0.324	-0.476	0.165	-0.139	-0.147	-0.302	-0.27	-0.0615	0.0885	-0.389	-0.0525	1
YOR129C	YOR129C	0.647119	0.274294	0.207	-0.158	0.153	0.373	0.062	-0.578	-0.715	-0.478	0.1345	-0.368	-0.281	-0.0525	1
YKL151C	YKL151C	0.221028	-0.376658	-0.138	-0.173	0.209	0.022	-0.204	-0.112	-0.197	-0.128	-0.171	-0.1425	0.006	-0.053	1
YLR227C	ADY4	0.637484	0.698308	-0.087	-0.996	-0.544	-0.341	0.084	-0.087	0.118	0.235	-0.0015	-0.5415	-0.213	-0.053	1
YMR225C	MRPL44	0.448084	-0.878069	0.01	0.019	0.304	0.169	-0.146	-0.267	-0.403	-0.275	-0.068	-0.124	-0.0495	-0.053	1
YDR139C	RUB1	0.362896	0.136271	0.275	-0.288	-0.042	-0.194	0.322	0.233	-0.46	0.086	0.2985	-0.0275	-0.251	-0.054	1
YDR436W	PPZ2	0.148067	-0.150007	-0.098	-0.227	-0.19	0.087	-0.037	-0.184	-0.139	-0.195	-0.0675	-0.2055	-0.1645	-0.054	1
YOR184W	SER1	1.24019	-0.407689	-0.054	-0.213	-1.048	-0.648	0.529	0.783	0.799	0.539	0.2375	0.285	-0.1245	-0.0545	0
YCL051W	LRE1	0.561211	-0.256189	-0.011	-0.05	-0.208	0.431	-0.171	-0.513	-0.482	-0.541	-0.091	-0.2815	-0.345	-0.055	1
YOR251C	YOR251C	0.710068	-0.874305	-0.116	-0.027	-0.117	-0.753	0.08	0.123	-0.201	0.643	-0.018	0.048	-0.159	-0.055	1
YPR156C	TPO3	1.30571	-0.825226	-0.384	-0.813	-1.434	-0.552	-0.06	0.356	0.655	0.44	-0.222	-0.2285	-0.3895	-0.056	0
YDR304C	CPR5	0.271499	0.804519	0.11	0.048	-0.126	-0.039	0.046	-0.247	-0.576	-0.074	0.078	-0.0995	-0.351	-0.0565	1
YJL057C	IKS1	0.468674	-0.990804	0.009	-0.018	0.169	0.355	0.026	0.073	-0.27	-0.468	0.0175	0.0275	-0.0505	-0.0565	1
YIL095W	PRK1	0.48285	-0.241978	-0.274	-0.328	-0.407	-0.38	0.092	0.076	0.06	0.266	-0.091	-0.126	-0.1735	-0.057	1
YNL291C	MID1	0.342565	-0.151083	-0.202	-0.168	-0.549	0.157	-0.589	-0.151	-0.18	-0.271	-0.3955	-0.1595	-0.3645	-0.057	1
YDR444W	YDR444W	0.376904	0.699482	0.297	0.278	0.186	0.095	0.017	0.023	-0.39	-0.21	0.157	0.1505	-0.102	-0.0575	1
YGR124W	ASN2	0.344779	-0.39152	-0.035	-0.151	0.249	-0.136	-0.03	-0.402	-0.374	0.02	-0.0325	-0.2765	-0.0625	-0.058	1
YBR258C	SHG1	0.389925	0.294673	0.211	-0.617	0.373	-0.25	-0.142	-0.055	0.228	0.133	0.0345	-0.336	0.3005	-0.0585	1
YGR088W	CTT1	0.110593	0.948458	-0.053	-0.016	0.334	-0.141	0.064	0.012	0.249	0.024	0.0055	-0.002	0.2915	-0.0585	1
YHR127W	YHR127W	0.306509	-0.644367	0.094	0.164	-0.063	0.223	-0.081	0.022	0.013	-0.342	0.0065	0.093	-0.025	-0.0595	1
YIL161W	YIL161W	0.277803	0.493832	-0.103	-0.161	0.134	0.147	-0.131	-0.45	-0.098	-0.266	-0.117	-0.3055	0.018	-0.0595	1
YJL100W	LSB6	0.233216	0.813153	0.065	0.282	-0.319	0.089	-0.067	-0.048	-0.264	-0.208	-0.001	0.117	-0.2915	-0.0595	1
YDR420W	HKR1	0.179773	-0.190442	-0.103	0.07	0.006	-0.115	-0.192	-0.073	-0.292	-0.005	-0.1475	-0.0015	-0.143	-0.06	1
YOR164C	YOR164C	0.482928	-0.488863	-0.358	-0.018	-0.38	-0.423	-0.211	-0.079	0.238	0.302	-0.2845	-0.0485	-0.071	-0.0605	1
YKR013W	PRY2	0.211937	-0.379245	-0.157	-0.017	0.034	-0.167	-0.174	-0.368	-0.072	0.045	-0.1655	-0.1925	-0.019	-0.061	1
YGR032W	GSC2	0.19237	-0.198564	0.051	0.174	0.217	-0.048	0.014	-0.09	-0.059	-0.076	0.0325	0.042	0.079	-0.062	1
YMR118C	YMR118C	0.459117	-0.869339	-0.016	0.051	-0.217	0.386	-0.002	0.005	-0.022	-0.51	-0.009	0.028	-0.1195	-0.062	1
YNL010W	YNL010W	0.177641	0.1368	0.006	0.181	0.141	0.097	0.034	0.032	0.095	-0.221	0.02	0.1065	0.118	-0.062	1
YLR433C	CNA1	0.287373	-0.829902	-0.175	-0.107	-0.152	0.15	0.163	-0.174	0.024	-0.275	-0.006	-0.1405	-0.064	-0.0625	1
YER142C	MAG1	0.76212	-0.854244	0.066	0.202	0.505	0.593	0.005	-0.078	-0.216	-0.719	0.0355	0.062	0.1445	-0.063	1
YFL004W	VTC2	0.454444	-0.888854	0.106	-0.163	-0.148	0.37	0.002	0.009	0.041	-0.496	0.054	-0.077	-0.0535	-0.063	1
YMR011W	HXT2	0.327989	-0.306528	-0.064	-0.247	0.247	0.166	0.194	0.143	0.216	-0.293	0.065	-0.052	0.2315	-0.0635	1
YDR058C	TGL2	0.697192	-0.161886	0.208	0.161	-0.039	0.529	-0.066	-0.148	-0.641	-0.659	0.071	0.0065	-0.34	-0.065	1
YLL024C	SSA2	0.521651	-0.271234	0.215	0.389	0.186	-0.291	0.137	0.01	-0.671	0.161	0.176	0.1995	-0.2425	-0.065	1
YBR073W	RDH54	0.173279	0.026735	0.017	0.131	0.182	-0.044	-0.02	-0.147	-0.017	-0.087	-0.0015	-0.008	0.0825	-0.0655	1
YMR246W	FAA4	0.394435	0.029156	-0.014	-0.009	-0.574	0.303	0.105	-0.121	-0.345	-0.434	0.0455	-0.065	-0.4595	-0.0655	1
YLL014W	YLL014W	0.253406	0.990861	0.166	0.235	-0.048	0.075	-0.059	0.002	-0.315	-0.209	0.0535	0.1185	-0.1815	-0.067	1
YGL085W	YGL085W	0.397028	-0.527552	-0.175	0.112	-0.023	-0.38	0	0.031	-0.476	0.243	-0.0875	0.0715	-0.2495	-0.0685	1
YLR420W	URA4	0.425747	0.591807	-0.068	-0.865	-0.083	-0.253	0.225	-0.156	-0.116	0.115	0.0785	-0.5105	-0.0995	-0.069	1
YOR134W	BAG7	0.493415	-0.491783	0.263	0.324	-0.056	0.396	0.095	0.052	0.026	-0.534	0.179	0.188	-0.015	-0.069	1
YPL244C	HUT1	0.42976	0.592559	-0.135	-0.833	0.055	-0.307	-0.032	-0.125	0.073	0.169	-0.0835	-0.479	0.064	-0.069	1
YLR001C	YLR001C	0.249841	-0.072474	0.075	0.024	0.26	0.175	0.102	0.098	0.194	-0.314	0.0885	0.061	0.227	-0.0695	1
YMR198W	CIK1	0.697926	0.045755	-0.728	0.272	-0.308	0.538	-0.751	-0.407	-0.205	-0.677	-0.7395	-0.0675	-0.2565	-0.0695	1
YJL093C	TOK1	0.483055	-0.034865	-0.026	0.013	0.027	0.268	-0.441	-0.509	-0.151	-0.408	-0.2335	-0.248	-0.062	-0.07	1
YNL104C	LEU4	0.693211	-0.670294	-0.037	-0.075	-0.543	-0.662	0.068	0.191	0.121	0.521	0.0155	0.058	-0.211	-0.0705	1
YOR023C	AHC1	0.327669	0.4461	0.07	-0.122	-0.068	-0.057	-0.114	-0.324	-0.663	-0.085	-0.022	-0.223	-0.3655	-0.071	1
YDR070C	FMP16	0.181572	0.535208	0.257	0.013	0.25	0.095	0.189	0.069	0.135	-0.238	0.223	0.041	0.1925	-0.0715	1
YGR263C	SAY1	0.306246	-0.880239	0.043	0.017	0.159	-0.009	-0.05	-0.068	-0.427	-0.135	-0.0035	-0.0255	-0.134	-0.072	1
YOL047C	YOL047C	0.406202	-0.566149	0.131	-0.317	0.116	0.25	0.025	-0.042	-0.282	-0.394	0.078	-0.1795	-0.083	-0.072	1
YHL013C	OTU2	0.827277	-0.820696	-0.277	-0.142	-1.132	0.461	-0.15	0.065	0.109	-0.606	-0.2135	-0.0385	-0.5115	-0.0725	1
YGL243W	TAD1	0.13591	0.710811	0.011	-0.074	0.342	0.047	0.117	-0.005	0.325	-0.193	0.064	-0.0395	0.3335	-0.073	1
YJR098C	YJR098C	0.403968	-0.775114	0.033	0.107	-0.099	0.318	-0.071	-0.063	-0.138	-0.464	-0.019	0.022	-0.1185	-0.073	1
YNR033W	ABZ1	0.376609	0.535671	0.276	0.437	0.269	0.093	0.038	-0.098	-0.069	-0.239	0.157	0.1695	0.1	-0.073	1
YNL066W	SUN4	0.207781	0.704299	0.137	0.172	-0.174	-0.045	-0.108	-0.141	-0.281	-0.102	0.0145	0.0155	-0.2275	-0.0735	1
YOR154W	SLP1	0.30673	-0.406477	-0.464	-0.46	0.089	0.079	-0.062	-0.177	-0.115	-0.226	-0.263	-0.3185	-0.013	-0.0735	1
YBR138C	YBR138C	0.420147	-0.775862	-0.074	0.074	0.236	0.253	-0.091	-0.227	-0.197	-0.401	-0.0825	-0.0765	0.0195	-0.074	1
YMR153W	NUP53	0.168033	0.763731	0.167	0.102	0.307	0.063	0.067	0.066	0.144	-0.211	0.117	0.084	0.2255	-0.074	1
YGL035C	MIG1	0.121658	0.923739	-0.17	-0.615	-0.404	-0.015	-0.282	-0.778	-0.327	-0.134	-0.226	-0.6965	-0.3655	-0.0745	1
YGR194C	XKS1	0.398096	-0.457724	-0.017	-0.103	-0.682	0.17	0.028	-0.073	-0.056	-0.319	0.0055	-0.088	-0.369	-0.0745	1
YPL253C	VIK1	0.205812	-0.798145	0.122	0.06	0.02	-0.151	-0.133	-0.21	-0.07	0.002	-0.0055	-0.075	-0.025	-0.0745	1
YDR055W	PST1	0.319176	-0.867047	-0.008	-0.288	0.212	-0.28	0.025	0.021	-0.167	0.129	0.0085	-0.1335	0.0225	-0.0755	1
YKL017C	HCS1	0.241108	0.31066	0.032	0.083	0.051	-0.275	0.055	0.182	0.302	0.124	0.0435	0.1325	0.1765	-0.0755	1
YIL032C	YIL032C	0.600686	-0.354722	0.123	-0.347	0.253	-0.109	-0.163	-0.483	-0.904	-0.043	-0.02	-0.415	-0.3255	-0.076	1
YBR053C	YBR053C	0.196704	-0.654338	0.098	0.193	0.099	-0.151	-0.004	-0.136	-0.019	-0.002	0.047	0.0285	0.04	-0.0765	1
YDL039C	PRM7	0.159984	0.020329	0.028	0.128	0.058	-0.198	0.157	0.095	-0.102	0.045	0.0925	0.1115	-0.022	-0.0765	1
YPL165C	SET6	0.148542	-0.055598	0.025	0.155	-0.116	-0.182	0.088	-0.01	-0.004	0.029	0.0565	0.0725	-0.06	-0.0765	1
YJL152W	YJL152W	0.452856	-0.231584	0.141	0.121	0.317	-0.519	0.081	0.294	0.39	0.365	0.111	0.2075	0.3535	-0.077	1
YDL203C	ACK1	0.38477	-0.676271	0.089	-0.052	0.177	0.2	0.042	-0.098	-0.352	-0.355	0.0655	-0.075	-0.0875	-0.0775	1
YFL034W	YFL034W	0.178467	0.231634	0.148	0.275	-0.133	0.021	0.068	0.063	0.06	-0.176	0.108	0.169	-0.0365	-0.0775	1
YNL229C	URE2	0.67202	0.997225	-0.233	-0.17	0.002	0.223	-0.933	-0.899	-0.649	-0.378	-0.583	-0.5345	-0.3235	-0.0775	1
YPL272C	YPL272C	0.150318	-0.389041	-0.08	0.012	-0.216	0.022	-0.064	-0.201	-0.15	-0.179	-0.072	-0.0945	-0.183	-0.0785	1
YGR125W	YGR125W	0.30141	-0.738417	0.001	0.016	-0.071	-0.354	-0.088	0.039	0.158	0.196	-0.0435	0.0275	0.0435	-0.079	1
YHR030C	SLT2	0.449223	0.967051	0.208	0.36	0.123	0.117	-0.254	-0.14	-0.313	-0.275	-0.023	0.11	-0.095	-0.079	1
YGR085C	RPL11B	0.380547	0.018809	-0.353	0.11	-0.832	-0.156	-0.403	-0.415	-0.305	-0.003	-0.378	-0.1525	-0.5685	-0.0795	1
YIL113W	SDP1	0.326279	-0.998375	-0.085	-0.109	-0.018	0.221	0.074	0.081	-0.047	-0.382	-0.0055	-0.014	-0.0325	-0.0805	1
YNR010W	CSE2	0.911417	-0.528138	-0.769	-1.101	-1.006	0.022	0.259	0.051	-0.059	-0.183	-0.255	-0.525	-0.5325	-0.0805	1
YBR220C	YBR220C	0.279894	-0.966787	-0.018	-0.001	-0.012	-0.36	0.038	-0.034	-0.013	0.196	0.01	-0.0175	-0.0125	-0.082	1
YJL196C	ELO1	0.242186	-0.795345	0.082	-0.103	0.016	0.109	0.016	0.161	-0.105	-0.273	0.049	0.029	-0.0445	-0.082	1
YER071C	YER071C	0.048536	0.896865	0.001	0.136	0.091	-0.104	0.055	0.069	0.078	-0.061	0.028	0.1025	0.0845	-0.0825	1
YIL042C	PKP1	0.389732	-0.583626	-0.139	0.016	0.06	0.292	-0.075	-0.099	0.231	-0.457	-0.107	-0.0415	0.1455	-0.0825	1
YLR389C	STE23	0.992048	-0.74028	0.16	0.188	-0.075	-0.966	0.306	0.463	0.772	0.801	0.233	0.3255	0.3485	-0.0825	1
YPR007C	REC8	0.983049	-0.097503	0.794	0.177	0.066	0.68	-0.206	-0.165	-0.582	-0.846	0.294	0.006	-0.258	-0.083	1
YOR312C	RPL20B	0.460401	0.228462	-0.092	0.621	-0.658	0.065	0.348	0.092	-0.123	-0.232	0.128	0.3565	-0.3905	-0.0835	1
YOR027W	STI1	0.273047	0.246123	0.019	0.132	-0.435	-0.283	0.063	-0.013	-0.092	0.114	0.041	0.0595	-0.2635	-0.0845	1
YGL028C	SCW11	0.423213	0.619466	-0.308	0.22	-0.307	0.186	-0.281	-0.104	-0.87	-0.356	-0.2945	0.058	-0.5885	-0.085	1
YML116W	ATR1	0.380908	0.946546	0.154	0.156	0.116	0.138	-0.035	-0.101	-0.412	-0.309	0.0595	0.0275	-0.148	-0.0855	1
YPL186C	UIP4	0.177973	0.530205	0.179	0.065	-0.326	0.051	0.087	-0.043	-0.147	-0.222	0.133	0.011	-0.2365	-0.0855	1
YNL324W	YNL324W	0.403613	-0.448845	-0.21	0.099	0.201	-0.45	-0.187	-0.232	0.087	0.277	-0.1985	-0.0665	0.144	-0.0865	1
YMR199W	CLN1	0.153341	0.790445	0.069	0.211	-0.046	0.046	0.125	0.182	-0.185	-0.22	0.097	0.1965	-0.1155	-0.087	1
YOL059W	GPD2	0.273526	0.18492	-0.073	0.198	0.199	0.084	-0.117	-0.044	-0.15	-0.258	-0.095	0.077	0.0245	-0.087	1
YBR008C	FLR1	0.31463	-0.876941	-0.031	-0.104	-0.118	0.213	0.095	-0.001	-0.027	-0.388	0.032	-0.0525	-0.0725	-0.0875	1
YBR287W	ZSP1	0.255626	0.243317	0.137	0.056	0.251	0.126	0.052	-0.048	0.004	-0.301	0.0945	0.004	0.1275	-0.0875	1
YLR257W	YLR257W	0.450091	-0.296606	0.129	-0.925	-0.33	-0.128	-0.351	-0.182	-0.184	-0.047	-0.111	-0.5535	-0.257	-0.0875	1
YMR048W	CSM3	0.659924	-0.371923	0.172	0.032	-0.495	-0.735	-0.065	-0.072	-0.471	0.559	0.0535	-0.02	-0.483	-0.088	1
YOR142W	LSC1	0.186738	0.98631	-0.345	-0.371	0.022	-0.034	-0.539	-0.67	0.05	-0.142	-0.442	-0.5205	0.036	-0.088	1
YDR250C	YDR250C	0.271668	0.845648	-0.119	0.004	-0.288	-0.214	0.145	0.173	0.078	0.037	0.013	0.0885	-0.105	-0.0885	1
YGR010W	NMA2	0.175615	-0.31083	0.017	-0.122	0.054	0.075	-0.007	-0.095	-0.069	-0.252	0.005	-0.1085	-0.0075	-0.0885	1
YFR041C	ERJ5	0.613397	-0.381165	-0.111	0.357	-0.044	-0.127	-0.369	-0.464	0.827	-0.051	-0.24	-0.0535	0.3915	-0.089	1
YNR057C	BIO4	0.321743	0.998618	0.284	0.403	-0.256	0.055	-0.068	-0.014	-0.437	-0.234	0.108	0.1945	-0.3465	-0.0895	1
YCR006C	YCR006C	1.15662	0.526256	-0.025	-1.616	0.293	-0.517	0.592	0.431	0.526	0.335	0.2835	-0.5925	0.4095	-0.091	1
YJL078C	PRY3	0.170852	-0.231499	0.038	0.213	-0.139	-0.045	0.037	-0.037	0.075	-0.137	0.0375	0.088	-0.032	-0.091	1
YNR030W	ALG12	0.271751	0.689075	0.379	0.539	0.254	-0.181	0.222	0.643	0.731	-0.001	0.3005	0.591	0.4925	-0.091	1
YDR186C	YDR186C	0.443501	-0.957886	-0.172	-0.074	-0.454	-0.343	0.031	0.043	0.238	0.16	-0.0705	-0.0155	-0.108	-0.0915	1
YMR201C	RAD14	1.28616	-0.133782	-0.339	-0.575	-2.519	-0.543	-0.404	-0.552	-0.111	0.359	-0.3715	-0.5635	-1.315	-0.092	0
YOR059C	YOR059C	0.224475	0.458132	0.076	0.084	-0.004	-0.117	0.142	0.158	-0.439	-0.067	0.109	0.121	-0.2215	-0.092	1
YOR359W	VTS1	0.51834	0.326281	0.248	0.229	0.119	0.265	-0.112	-0.163	-0.409	-0.451	0.068	0.033	-0.145	-0.093	1
YDR439W	LRS4	1.17446	0.761806	0.531	1.401	-0.006	0.565	-0.517	-0.137	-0.571	-0.752	0.007	0.632	-0.2885	-0.0935	1
YJL116C	NCA3	0.307252	0.079983	0.111	0.182	0.316	0.211	0.175	0.188	0.265	-0.398	0.143	0.185	0.2905	-0.0935	1
YAL018C	YAL018C	0.331763	-0.361401	-0.01	-0.543	0.003	-0.224	0.071	0.062	0.012	0.036	0.0305	-0.2405	0.0075	-0.094	1
YAR035W	YAT1	0.532957	-0.840216	0.044	-0.178	0.28	0.322	0.21	0.09	-0.307	-0.51	0.127	-0.044	-0.0135	-0.094	1
YHR130C	YHR130C	0.41857	-0.696956	0.003	0.147	-0.035	0.312	-0.062	0	-0.16	-0.5	-0.0295	0.0735	-0.0975	-0.094	1
YKL199C	PTK1_p	0.322091	-0.086054	0.295	0.154	-0.489	-0.017	0.028	0.086	0.072	-0.173	0.1615	0.12	-0.2085	-0.095	1
YMR137C	PSO2	0.262065	-0.423744	0.006	-0.124	0.173	0.103	0.046	-0.12	-0.168	-0.293	0.026	-0.122	0.0025	-0.095	1
YAL067C	SEO1	0.272844	0.024396	0.216	-0.219	0.176	-0.008	0.242	0.046	-0.267	-0.183	0.229	-0.0865	-0.0455	-0.0955	1
YFR049W	YMR31	0.357212	-0.649705	0.193	0.211	0.274	-0.156	-0.044	-0.135	-0.292	-0.037	0.0745	0.038	-0.009	-0.0965	1
YOL131W	YOL131W	0.206924	-0.176019	0.215	0.041	-0.041	0.071	0.031	0.026	0.117	-0.264	0.123	0.0335	0.038	-0.0965	1
YPL041C	YPL041C	0.246869	-0.251712	-0.236	-0.141	-0.459	0.06	0.023	-0.283	-0.217	-0.253	-0.1065	-0.212	-0.338	-0.0965	1
YHR125W	YHR125W	0.347221	0.0431	0.351	0.257	0.288	-0.083	-0.117	-0.023	-0.141	-0.111	0.117	0.117	0.0735	-0.097	1
YJL098W	SAP185	0.157659	0.900022	0.142	0.159	-0.327	0.048	0.077	0.129	-0.428	-0.242	0.1095	0.144	-0.3775	-0.097	1
YJL126W	NIT2	0.537055	-0.09908	-0.074	-0.663	-0.814	0.264	0.185	-0.145	-0.269	-0.458	0.0555	-0.404	-0.5415	-0.097	1
YLR030W	YLR030W	0.297135	-0.984357	-0.024	0.038	0.288	-0.334	0.004	0.007	-0.068	0.14	-0.01	0.0225	0.11	-0.097	1
YPL111W	CAR1	0.15309	0.8643	0.091	0.046	-0.114	0.017	-0.005	-0.074	-0.247	-0.212	0.043	-0.014	-0.1805	-0.0975	1
YDR423C	CAD1	0.412353	-0.810367	0.08	0.112	0.209	0.278	-0.001	-0.093	-0.048	-0.474	0.0395	0.0095	0.0805	-0.098	1
YPR009W	SUT2	0.423134	-0.020324	0.05	0.234	0.381	0.291	0.007	-0.02	0.17	-0.487	0.0285	0.107	0.2755	-0.098	1
YBR077C	SLM4	0.979547	-0.005397	-0.415	0.103	-0.062	-0.907	0.305	0.808	0.394	0.71	-0.055	0.4555	0.166	-0.0985	1
YLR441C	RPS1A	1.11164	-0.629676	-0.2	0.749	-0.896	0.719	-0.661	-0.285	0.098	-0.916	-0.4305	0.232	-0.399	-0.0985	1
YML079W	YML079W	0.732416	-0.470512	0.065	-0.042	-0.155	0.586	0.32	-0.431	-0.39	-0.783	0.1925	-0.2365	-0.2725	-0.0985	1
YIL140W	AXL2	0.420049	-0.624965	-0.14	-0.391	-0.129	-0.388	-0.062	0.148	0.145	0.19	-0.101	-0.1215	0.008	-0.099	1
YNR058W	BIO3	0.229872	-0.806267	-0.021	0.058	0.052	0.085	0.225	0.138	-0.043	-0.283	0.102	0.098	0.0045	-0.099	1
YLR099C	ICT1	0.544539	-0.903955	-0.074	-0.261	-0.05	0.438	-0.173	-0.12	-0.022	-0.637	-0.1235	-0.1905	-0.036	-0.0995	1
YPR097W	YPR097W	0.129149	0.674562	-0.001	0.069	-0.074	-0.151	0.075	0.122	0.144	-0.048	0.037	0.0955	0.035	-0.0995	1
YDR011W	SNQ2	0.730366	-0.696115	-0.083	-0.107	-0.96	-0.479	0.008	0.175	0.253	0.279	-0.0375	0.034	-0.3535	-0.1	1
YJR150C	DAN1	0.122321	0.812251	0.176	0.006	-0.278	0.003	0.07	-0.043	-0.22	-0.204	0.123	-0.0185	-0.249	-0.1005	1
YOR044W	IRC23	0.742779	-0.459689	0.029	-0.76	0.256	0.17	0.064	-0.183	-1.001	-0.371	0.0465	-0.4715	-0.3725	-0.1005	1
YIL008W	URM1	0.396856	-0.745441	-0.06	-0.154	0.211	-0.449	-0.249	-0.114	-0.118	0.247	-0.1545	-0.134	0.0465	-0.101	1
YPL110C	GDE1	0.228452	0.154564	0	0.204	-0.411	0.003	0.026	0.011	-0.055	-0.207	0.013	0.1075	-0.233	-0.102	1
YBR184W	YBR184W	0.220199	-0.614008	0.031	-0.21	0.11	0.033	0.01	0.038	-0.132	-0.238	0.0205	-0.086	-0.011	-0.1025	1
YCR090C	YCR090C	0.217668	0.07052	0.129	0.193	0.273	-0.133	0.083	0.112	-0.148	-0.073	0.106	0.1525	0.0625	-0.103	1
YDR380W	ARO10	0.303101	-0.050372	0.17	0.19	-0.372	0.128	0.052	0.023	-0.037	-0.334	0.111	0.1065	-0.2045	-0.103	1
YNL268W	LYP1	0.320469	0.309462	-0.171	-0.3	-0.177	0.18	-0.33	-0.482	-0.356	-0.386	-0.2505	-0.391	-0.2665	-0.103	1
YDL010W	YDL010W	0.460425	-0.293946	0.105	0.065	-0.197	0.346	0.001	-0.024	-0.342	-0.553	0.053	0.0205	-0.2695	-0.1035	1
YDR116C	MRPL1	0.394351	0.109822	-0.091	-0.366	0.047	0.228	-0.44	-0.315	0.288	-0.435	-0.2655	-0.3405	0.1675	-0.1035	1
YER137C	YER137C	0.58116	-0.02974	-0.001	0.265	-0.21	0.418	-0.013	-0.088	-0.582	-0.625	-0.007	0.0885	-0.396	-0.1035	1
YGR286C	BIO2	0.202077	0.456521	0.087	0.168	0.13	0.008	-0.023	-0.144	0.069	-0.216	0.032	0.012	0.0995	-0.104	1
YNL046W	YNL046W	0.618629	0.650778	0.153	-0.921	0.224	-0.519	0.349	-0.025	0.198	0.311	0.251	-0.473	0.211	-0.104	1
YMR178W	YMR178W	0.240481	-0.547241	0.057	0.05	0.137	0.129	0.061	0.024	0.025	-0.338	0.059	0.037	0.081	-0.1045	1
YEL015W	EDC3	0.651216	-0.399473	0.015	-0.454	0.412	-0.093	0.794	0.471	-0.071	-0.117	0.4045	0.0085	0.1705	-0.105	1
YJR153W	PGU1	0.377493	-0.920728	0.024	-0.146	0.064	0.236	0.053	0.088	-0.158	-0.446	0.0385	-0.029	-0.047	-0.105	1
YKR070W	YKR070W	0.360683	-0.884453	-0.019	0.069	0.216	-0.436	0.011	-0.102	-0.012	0.226	-0.004	-0.0165	0.102	-0.105	1
YPR193C	HPA2	0.285267	-0.047123	0.246	-0.13	0.13	-0.072	0.138	0.099	-0.377	-0.138	0.192	-0.0155	-0.1235	-0.105	1
YML019W	OST6	0.452576	0.626174	0.007	-0.732	-0.433	0.237	-0.006	-0.707	-1.024	-0.448	0.0005	-0.7195	-0.7285	-0.1055	1
YKR023W	YKR023W	0.138552	0.833208	-0.12	-0.059	-0.112	-0.118	0.011	0.136	0.033	-0.094	-0.0545	0.0385	-0.0395	-0.106	1
YEL030W	ECM10	0.273802	-0.50738	-0.006	0.311	-0.156	-0.035	0.015	-0.081	0.198	-0.178	0.0045	0.115	0.021	-0.1065	1
YJR038C	YJR038C	0.228472	-0.639069	-0.011	-0.008	-0.326	0.012	-0.009	-0.015	0.064	-0.226	-0.01	-0.0115	-0.131	-0.107	1
YOR376W	YOR376W	0.407747	0.404099	-0.207	-0.484	0.225	0.217	-0.185	-0.258	0.662	-0.433	-0.196	-0.371	0.4435	-0.108	1
YDR332W	IRC3	2.2466	-0.288197	-0.69	1.288	-0.225	1.163	-1.526	-2.014	-1.681	-1.38	-1.108	-0.363	-0.953	-0.1085	0
YHL037C	YHL037C	0.333623	-0.525231	-0.054	0.162	-0.106	0.102	-0.294	-0.276	-0.239	-0.32	-0.174	-0.057	-0.1725	-0.109	1
YMR156C	TPP1	0.700738	-0.917055	0.179	0.214	0.269	0.47	0.031	-0.043	-0.461	-0.689	0.105	0.0855	-0.096	-0.1095	1
YJL120W	YJL120W	1.03094	0.363703	-0.798	-0.506	-2.386	-0.393	-0.18	-0.726	-0.515	0.173	-0.489	-0.616	-1.4505	-0.11	1
YBL067C	UBP13	0.697501	-0.766156	0.241	0.252	0.406	0.434	-0.173	-0.162	-0.24	-0.655	0.034	0.045	0.083	-0.1105	1
YER088C	DOT6	1.52709	-0.928251	0.024	-0.068	-1.816	-0.739	0.152	0.465	0.913	0.518	0.088	0.1985	-0.4515	-0.1105	0
YOL163W	YOL163W	0.208771	0.618069	0.237	-0.012	0.325	-0.29	0.068	0.054	0.213	0.069	0.1525	0.021	0.269	-0.1105	1
YJL077C	ICS3	0.623518	-0.774966	0.302	0.241	0.382	0.423	0.028	-0.044	-0.124	-0.646	0.165	0.0985	0.129	-0.1115	1
YJR024C	YJR024C	0.226779	0.834009	0.211	0.275	-0.049	-0.005	-0.058	-0.013	-0.12	-0.218	0.0765	0.131	-0.0845	-0.1115	1
YOR229W	WTM2	0.430731	-0.981492	0.076	0.006	0.009	0.299	-0.039	0.089	0.228	-0.522	0.0185	0.0475	0.1185	-0.1115	1
YLR061W	RPL22A	0.449797	-0.773033	-0.046	0.085	-0.262	-0.495	-0.292	-0.308	-0.365	0.269	-0.169	-0.1115	-0.3135	-0.113	1
YGL263W	COS12	0.152989	0.410311	0.103	-0.106	0.027	-0.24	0.186	0.005	-0.075	0.013	0.1445	-0.0505	-0.024	-0.1135	1
YJL197W	UBP12	0.237464	0.09212	-0.065	-0.039	-0.391	0.096	0.11	-0.086	-0.26	-0.323	0.0225	-0.0625	-0.3255	-0.1135	1
YLR236C	YLR236C	0.238438	0.407275	0.131	-0.001	0.431	0.02	0.068	0.042	0.044	-0.248	0.0995	0.0205	0.2375	-0.114	1
YGL086W	MAD1	0.358214	-0.554973	0.194	0.078	0.241	-0.04	-0.238	-0.04	-0.298	-0.189	-0.022	0.019	-0.0285	-0.1145	1
YMR109W	MYO5	0.200598	0.149869	0.124	0.194	-0.101	0.031	0.092	-0.069	-0.023	-0.26	0.108	0.0625	-0.062	-0.1145	1
YCR098C	GIT1	0.126525	0.951874	0.125	0.147	-0.264	-0.096	0.003	-0.048	-0.362	-0.135	0.064	0.0495	-0.313	-0.1155	1
YMR177W	MMT1	0.29057	-0.063862	0.101	-0.148	-0.283	-0.368	0.082	-0.299	-0.039	0.137	0.0915	-0.2235	-0.161	-0.1155	1
YDL023C	YDL023C	0.475819	0.737611	0.095	-0.711	0.233	-0.411	0.493	-0.081	0.186	0.179	0.294	-0.396	0.2095	-0.116	1
YLL021W	SPA2	0.285738	-0.561908	0.004	0.275	0.012	-0.358	-0.126	0.003	-0.026	0.126	-0.061	0.139	-0.007	-0.116	1
YIL117C	PRM5	0.156453	0.533753	0.106	0.162	0.156	-0.095	0.007	0.144	-0.137	-0.139	0.0565	0.153	0.0095	-0.117	1
YHL021C	FMP12	0.197114	0.868629	-0.04	0.063	0.1	-0.06	0.113	0.148	0.434	-0.175	0.0365	0.1055	0.267	-0.1175	1
YJL168C	SET2	0.389679	0.889464	-0.335	-0.442	-1.149	0.185	-0.673	-0.515	-0.8	-0.42	-0.504	-0.4785	-0.9745	-0.1175	1
YOL064C	MET22	0.501194	0.375472	-0.495	-0.147	-0.825	0.029	0.213	0.395	-0.473	-0.264	-0.141	0.124	-0.649	-0.1175	1
YBR270C	BIT2	0.400311	0.237698	0.038	0.264	-0.254	0.145	0.106	-0.294	-0.469	-0.383	0.072	-0.015	-0.3615	-0.119	1
YKR073C	YKR073C	0.485608	-0.526582	-0.335	-0.029	-0.14	-0.529	0.027	0.025	0.23	0.291	-0.154	-0.002	0.045	-0.119	1
YOR101W	RAS1	0.176545	-0.065839	-0.012	-0.14	-0.238	0.056	0	-0.142	-0.193	-0.294	-0.006	-0.141	-0.2155	-0.119	1
YMR003W	YMR003W	0.434652	-0.733427	-0.203	-0.434	-0.027	0.24	0.13	-0.105	-0.167	-0.479	-0.0365	-0.2695	-0.097	-0.1195	1
YPR121W	THI22	0.461165	-0.008519	-0.032	0.168	0.149	0.149	-0.319	-0.192	-0.442	-0.389	-0.1755	-0.012	-0.1465	-0.12	1
YDL130W-A	STF1	0.245268	0.158869	0.015	0.132	0.271	0.055	0.056	-0.024	-0.029	-0.298	0.0355	0.054	0.121	-0.1215	1
YLR367W	RPS22B	0.22133	0.144042	-0.206	-0.514	-0.184	-0.07	-0.35	-0.325	-0.543	-0.173	-0.278	-0.4195	-0.3635	-0.1215	1
YDL180W	YDL180W	0.298222	0.277653	0.167	0.26	-0.106	0.168	0.038	0.222	-0.096	-0.413	0.1025	0.241	-0.101	-0.1225	1
YIL167W	SDL1	0.383754	-0.595229	0.07	-0.057	0.223	0.24	0.055	-0.01	-0.024	-0.485	0.0625	-0.0335	0.0995	-0.1225	1
YPR098C	YPR098C	0.296598	0.952864	-0.006	0.067	-0.727	-0.214	0.014	-0.021	-0.17	-0.031	0.004	0.023	-0.4485	-0.1225	1
YER046W	SPO73	0.380466	-0.119442	-0.008	0.228	0.302	0.224	0.074	-0.045	0.175	-0.47	0.033	0.0915	0.2385	-0.123	1
YMR130W	YMR130W	0.332292	-0.001307	-0.062	0.145	0.323	0.182	0.086	-0.025	0.186	-0.428	0.012	0.06	0.2545	-0.123	1
YPL114W	YPL114W	0.291844	0.378558	0.149	0.156	-0.067	0.144	0.108	0.021	-0.25	-0.392	0.1285	0.0885	-0.1585	-0.124	1
YPR064W	YPR064W	0.504496	0.219767	0.713	0.551	0.064	-0.272	-0.012	0.019	-0.285	0.024	0.3505	0.285	-0.1105	-0.124	1
YGR107W	YGR107W	0.553322	-0.653852	0.033	-0.619	0.289	-0.325	-0.189	-0.218	-0.635	0.076	-0.078	-0.4185	-0.173	-0.1245	1
YGL261C	PAU11	0.241882	-0.195902	0.082	-0.152	-0.178	-0.072	0.109	0.067	0.239	-0.179	0.0955	-0.0425	0.0305	-0.1255	1
YLR004C	THI73	0.321781	-0.776154	0.114	0.069	-0.189	0.052	-0.015	-0.067	0.314	-0.303	0.0495	0.001	0.0625	-0.1255	1
YOR311C	HSD1	0.76999	-0.567925	0.076	0.093	0.045	0.499	-0.065	-0.497	-0.621	-0.75	0.0055	-0.202	-0.288	-0.1255	1
YPL162C	YPL162C	0.373859	0.068443	0.16	0.038	0.376	0.101	-0.217	0.026	-0.084	-0.352	-0.0285	0.032	0.146	-0.1255	1
YHR039C	MSC7	0.382285	0.284269	0.034	-0.379	-0.503	0.205	0.297	-0.111	-0.576	-0.457	0.1655	-0.245	-0.5395	-0.126	1
YCR015C	YCR015C	0.456262	-0.478118	0.127	0.106	0.491	-0.033	0.088	0.317	-0.376	-0.22	0.1075	0.2115	0.0575	-0.1265	1
YGR291C	YGR291C	0.37582	-0.953148	0.078	0.124	0.136	0.24	0.05	0.037	-0.003	-0.493	0.064	0.0805	0.0665	-0.1265	1
YHL017W	YHL017W	0.325437	-0.965534	-0.017	-0.283	-0.451	-0.068	-0.169	-0.061	0.13	-0.185	-0.093	-0.172	-0.1605	-0.1265	1
YBR299W	MAL32	0.199325	0.984843	0.255	0.191	0.25	0.025	0.157	0.033	0.073	-0.28	0.206	0.112	0.1615	-0.1275	1
YLR098C	CHA4	0.440037	-0.812622	0.015	0.13	-0.299	-0.499	0.17	0.083	0.144	0.244	0.0925	0.1065	-0.0775	-0.1275	1
YNL047C	SLM2	0.807393	-0.591595	0.273	0.083	0.275	0.503	0.099	-0.184	-0.682	-0.758	0.186	-0.0505	-0.2035	-0.1275	1
YJR134C	SGM1	0.329541	-0.89604	-0.142	-0.263	0.026	0.08	0.155	0.136	-0.092	-0.336	0.0065	-0.0635	-0.033	-0.128	1
YPL145C	KES1	0.408264	0.16898	0.168	0.279	0.293	-0.535	0.207	0.301	0.339	0.279	0.1875	0.29	0.316	-0.128	1
YMR192W	GYL1	0.143016	0.140222	-0.021	0.013	0.074	-0.097	0.074	0.155	-0.146	-0.162	0.0265	0.084	-0.036	-0.1295	1
YDR107C	YDR107C	0.096224	0.365931	-0.107	0.025	-0.1	-0.119	0.074	0.02	-0.039	-0.142	-0.0165	0.0225	-0.0695	-0.1305	1
[truncated: 2,132 more rows]
