# Supplementary material for: Genome-Wide Screen in Saccharomyces cerevisiae Identifies Vacuolar Protein Sorting, Autophagy, Biosynthetic, and tRNA Methylation Genes Involved in Life Span Regulation
Source: PLoS Genet. 2010 Jul 15;6(7):e1001024. doi: 10.1371/journal.pgen.1001024 (PMC2904796; doi:10.1371/journal.pgen.1001024)
Supplement: Table S5 — p and q values obtained by EDGE analysis for the mutants classified as short-lived by K-means clustering. (0.07 MB XLS) [file pgen.1001024.s009.xls]

## Sheet: short-lived_qvalue-5
Table S5. p and q values obtained by EDGE analysis for the mutants classified as short-lived by K-means clustering.
Description
This is the list of short-lived mutants as identified by the K-means clustering analysis and by visual inspection of the clusters. Included are corresponding p-values and q-values calculated by the Significance analysis of time course microarray experiments. The p-value of a test measures the minimum false positive rate that is incurred when calling that test significant. The q-value of a test me…
Rank	Gene Name	P-Value	Q-Value
6	'SSK2'	5.56901e-05	0.0173862
7	'MET2'	7.74818e-05	0.0173862
12	'YEL028W'	9.92736e-05	0.0181509
14	'GID7'	0.000145278	0.0196704
16	'GYP1'	0.00016707	0.0196704
17	'CWH43'	0.000179177	0.0196704
20	'MBA1'	0.000188862	0.0196704
24	'YBR255W'	0.000271186	0.0196704
25	'GPT2'	0.000273608	0.0196704
26	'LDB16'	0.000276029	0.0196704
28	'HIR3'	0.000285714	0.0196704
30	'BCK1'	0.000285714	0.0196704
32	'MET6'	0.000302663	0.0196704
38	'UBX4'	0.000346247	0.0199916
41	'GSG1'	0.00038983	0.0208611
45	'UFD2'	0.000457627	0.0219309
46	'ADH2'	0.000472155	0.0219309
49	'FMP26'	0.000510896	0.0219309
51	'COX11'	0.00053753	0.0219309
54	'MOH1'	0.000578692	0.0219309
55	'RIM8_p'	0.00059322	0.0219309
59	'LYS1'	0.000622276	0.0219309
61	'MRPL17'	0.000639225	0.0219309
73	'YNL190W'	0.000733656	0.0219309
76	'YCR045C'	0.000769976	0.0219309
85	'YPR123C'	0.00100968	0.0251089
92	'ARG2'	0.00107022	0.0251089
95	'PAU2'	0.00113317	0.0251089
97	'OSH2'	0.00114044	0.0251089
98	'EGD1'	0.00114528	0.0251089
101	'UBP8'	0.00116465	0.0251089
106	'CBP4'	0.00121308	0.0251089
107	'YNL276C'	0.00123002	0.0251358
108	'MAK10'	0.00123729	0.0251358
112	'PET112'	0.00130266	0.0253399
117	'FMT1'	0.00136562	0.0256087
122	'CPS1'	0.00151332	0.0269873
123	'YKR096W'	0.00153027	0.0269873
128	'RSM24'	0.00159806	0.0272517
129	'YPL150W'	0.00161985	0.0272517
133	'LOS1'	0.0016707	0.0275608
134	'WHI3'	0.00170702	0.0279498
135	'MRPL20'	0.00174576	0.0283072
136	'PPZ1'	0.00175545	0.0283072
138	'ATG21'	0.00179661	0.028435
142	'SKN7'	0.00190315	0.0292742
144	'AEP1'	0.00195157	0.029735
151	'YCP4'	0.00208959	0.0300818
152	'TOM71'	0.00209927	0.0300818
153	'YOR052C'	0.00212107	0.0300818
154	'ATH1'	0.00212833	0.0300818
156	'MAK3'	0.00214044	0.0300818
159	'PMP3'	0.00219128	0.0300818
171	'SOL2'	0.00244794	0.031257
174	'YMR244C-A'	0.00253027	0.0319052
175	'YJL147C'	0.00259564	0.0323577
176	'RAD55'	0.00259564	0.0323577
181	'PNT1'	0.00267555	0.0324293
184	'RPS21B'	0.00276998	0.0327123
185	'MAL33'	0.00279419	0.0327123
190	'SSD1'	0.00289346	0.0327123
192	'YLR404W'	0.00294431	0.0327123
197	'PTH1'	0.00302421	0.0327123
198	'YML101C-A'	0.00302663	0.0327123
203	'CIT1'	0.00311622	0.0327123
205	'MRH4'	0.00312349	0.0327123
206	'YKL121W'	0.00313075	0.0327123
207	'SYS1'	0.0031477	0.0327123
210	'GID8'	0.00318402	0.0327123
214	'HSE1'	0.0032276	0.0327123
217	'GCN4'	0.00328571	0.0327123
220	'VPS27'	0.00330993	0.0327123
224	'ATG15'	0.00336804	0.0328527
227	'IZH3'	0.00346973	0.0328527
229	'RHO5'	0.00348668	0.0328527
230	'LUG1'	0.0034891	0.0328527
232	'YPR116W'	0.00350363	0.0328527
233	'MED1'	0.00350848	0.0328527
236	'MKS1'	0.00354964	0.0328527
237	'ADD37'	0.00354964	0.0328527
238	'HIR2'	0.00357627	0.0328527
240	'SAK1'	0.00366102	0.0330673
243	'YGL235W'	0.00367797	0.0330673
245	'AVT1'	0.00369249	0.0330673
246	'MRP2'	0.00371186	0.0330792
247	'DYN2'	0.00372397	0.0330792
248	'YGR053C'	0.00374334	0.0331171
254	'YPL183C'	0.0039322	0.0336455
255	'YMR084W'	0.00394189	0.0336455
256	'VAB2'	0.00395642	0.0336455
257	'VID30'	0.00396368	0.0336455
260	'SIP3'	0.00399032	0.0336455
267	'UBI4'	0.0041937	0.0343088
276	'PCA1'	0.00431719	0.0343192
277	'PAA1'	0.00439709	0.0347029
278	'YMR294W-A'	0.00439709	0.0347029
279	'YNR025C'	0.00442857	0.0348261
281	'MRPL9'	0.00450363	0.0351149
283	'CAJ1'	0.00461259	0.0357605
285	'MRPL38'	0.00468281	0.035947
287	'YMR245W'	0.00470218	0.035947
293	'YOL037C'	0.00483051	0.0359986
296	'HIS7'	0.00486199	0.0360385
297	'GPB1'	0.00489588	0.0360819
301	'SSK1'	0.0049661	0.0361988
308	'VAC17'	0.00519613	0.0365691
310	'YHL008C'	0.00520823	0.0365691
312	'SET3'	0.00528571	0.0365691
314	'PSD1'	0.00528814	0.0365691
315	'HIR1'	0.00529056	0.0365691
317	'CYC2'	0.0052954	0.0365691
322	'SGF29'	0.0055109	0.0374153
327	'YKU70'	0.00563438	0.0377217
330	'LDB19'	0.00571186	0.0379482
334	'RTG2'	0.0058523	0.0379482
336	'PRX1'	0.00587167	0.0379482
340	'PDC1'	0.00590557	0.0379482
342	'EMI1'	0.00599274	0.0379482
343	'GFD2'	0.00602663	0.0379482
344	'PMP1'	0.00602663	0.0379482
348	'YPR153W'	0.00611138	0.0379482
351	'PET111'	0.00619128	0.0379482
357	'MSW1'	0.00623729	0.0379482
358	'PCL6'	0.00623971	0.0379482
359	'RMD8'	0.00624697	0.0379482
360	'LIP2'	0.00626392	0.0379482
362	'ADE3'	0.00627845	0.0379482
363	'VTA1'	0.00627845	0.0379482
369	'JNM1'	0.00643826	0.0380726
373	'ADD66'	0.00649395	0.0380726
375	'HNT3'	0.00653753	0.0380726
377	'SHM2'	0.00655932	0.0380726
381	'SWS2'	0.00663196	0.0381746
382	'MRPS16'	0.00664649	0.0381746
388	'QCR8'	0.00689104	0.0389671
389	'CLB2'	0.00694431	0.0391674
396	'YPL183W-A'	0.00712107	0.0392172
398	'BMH1'	0.00715981	0.0392172
401	'VHS3'	0.00719613	0.0392172
404	'YMR258C'	0.0072954	0.0395483
406	'YPL225W'	0.00733898	0.0395889
408	'YLR168C'	0.00746973	0.0401097
418	'IRC9'	0.00775303	0.0406023
422	'HFA1'	0.00782809	0.0406085
424	'YML089C'	0.00786925	0.0406085
433	'SSP120'	0.00809685	0.0409451
438	'YMR099C'	0.00819371	0.0409507
439	'GAL80'	0.00819371	0.0409507
440	'OPI3'	0.00823971	0.0410573
445	'PEX5'	0.00838257	0.0411715
449	'RTN1'	0.00849395	0.0415058
452	'BLM10_p'	0.0085569	0.0415359
454	'DCN1'	0.00869976	0.0420433
455	'YPL030W'	0.00872155	0.0420559
457	'MKK1'	0.00890557	0.0426494
461	'YBR056W'	0.00896126	0.0426494
462	'GDH3'	0.00899032	0.0426951
464	'YJL123C'	0.00912106	0.0431293
465	'ICL1'	0.00915012	0.0431737
470	'YIL077C'	0.00933656	0.0433611
481	'PCP1'	0.00950605	0.0433611
483	'NIP100'	0.0095908	0.0434448
488	'BRE5'	0.00966586	0.0434448
490	'VHS1'	0.00971913	0.0435187
491	'COQ1'	0.00983777	0.0439603
498	'DPH1'	0.0102567	0.0448504
499	'EFT2'	0.0102591	0.0448504
503	'SXM1'	0.010322	0.0448504
505	'COQ5'	0.0103438	0.0448504
507	'YLR312C'	0.0103777	0.0448504
512	'PEX6'	0.0104794	0.0448504
518	'RMD9'	0.0106368	0.0449622
519	'YGL010W'	0.0106489	0.0449622
522	'RKR1'	0.0107385	0.0449622
529	'HST1'	0.0108862	0.0449622
530	'SCJ1'	0.0108935	0.0449622
534	'RPN4'	0.0109516	0.0449622
535	'AMN1'	0.0109637	0.0449622
536	'YPT7'	0.0110024	0.0449827
539	'BCS1'	0.0111622	0.0452387
543	'MHP1'	0.0112228	0.0452387
547	'YIL039W'	0.0113777	0.0455477
548	'COQ3'	0.0113922	0.0455477
549	'MSS116'	0.0113971	0.0455477
551	'SMI1'	0.0114649	0.0456218
555	'QCR7'	0.0115739	0.045647
556	'ASG1'	0.0115835	0.045647
558	'MSS18'	0.0117361	0.0461205
559	'TIF2'	0.0117506	0.0461205
562	'CYT2'	0.0119927	0.0467741
564	'RLM1'	0.0120339	0.0468136
567	'VPS25'	0.0121864	0.04712
569	'BAP2'	0.0122784	0.0473453
570	'CYC1'	0.012368	0.0475981
572	'PDE2'	0.0124092	0.0475985
584	'PTK2'	0.0129734	0.0486794
587	'CLG1'	0.0130291	0.0486794
588	'PMT1'	0.013046	0.0486794
589	'YCR043C'	0.0131114	0.0488025
591	'RPA14'	0.0131937	0.0489069
592	'SSA4'	0.0131961	0.0489069
594	'RRD2'	0.0132542	0.0489568
596	'YOR277C'	0.0133366	0.0490251
598	'RAV1'	0.0133753	0.0490251
611	'MTO1'	0.0138281	0.0496398
621	'KGD1'	0.0140581	0.0496398
622	'YDL057W'	0.0140726	0.0496398
623	'YCR050C'	0.0141356	0.0497819
626	'YBR277C'	0.0142542	0.04991
630	'GCV3'	0.0143971	0.0501021
634	'RMD5'	0.0145811	0.0503805
639	'YER084W'	0.0147167	0.0504517
640	'YER093C-A'	0.0147167	0.0504517
644	'YEL033W'	0.0149322	0.0508725
646	'APL3'	0.015	0.0508864
649	'ATG10'	0.0150775	0.0509717
651	'ISU2'	0.0151671	0.0511171
653	'TRM7'	0.0152324	0.0511802
655	'YPL025C'	0.0153729	0.051343
657	'STE50'	0.0153995	0.051343
658	'ATG3'	0.0154189	0.051343
660	'ATG7'	0.0154552	0.0513779
663	'YPR197C'	0.0156441	0.0516973
664	'VPS8'	0.015661	0.0516973
666	'VPS36'	0.0157288	0.0516973
668	'YEL043W'	0.0157433	0.0516973
672	'YNL040W'	0.0160024	0.05204
674	'MIS1'	0.0160242	0.05204
675	'ATP5'	0.0160266	0.05204
676	'YBL062W'	0.0160339	0.05204
677	'YDL156W'	0.0160968	0.0520683
680	'CAT8'	0.0162155	0.0522624
682	'CSF1'	0.0162784	0.0522624
684	'CAN1'	0.016293	0.0522624
688	'YDL025C'	0.0165448	0.0527135
690	'YBR246W'	0.0166392	0.0527135
693	'ATP10'	0.016707	0.0527135
697	'UGA3'	0.01677	0.0527135
701	'FAT1'	0.0169249	0.0529534
702	'MLS1'	0.0170024	0.0529534
703	'UBC8'	0.0170484	0.0529534
704	'YHL005C'	0.0170969	0.0529534
706	'YDR049W'	0.0171211	0.0529534
713	'LEU3'	0.0172107	0.0529534
717	'ATG4'	0.0173826	0.0531615
720	'MST1'	0.0175206	0.0533603
725	'YPL109C'	0.0177264	0.0535557
728	'YKL037W'	0.0178499	0.0537959
732	'ISY1'	0.0179564	0.0538212
735	'YOR055W'	0.0182058	0.0542794
738	'YMR158W-B'	0.0183027	0.054413
739	'YNR042W'	0.0183608	0.0545119
740	'LCB4'	0.0184261	0.0546321
741	'FMP39'	0.0185133	0.0548165
742	'DIA1'	0.0186053	0.0550147
745	'YHR151C'	0.0187458	0.0551541
749	'TNA1'	0.0189516	0.0555148
751	'PSP1'	0.019046	0.0556324
753	'AGP3'	0.0191356	0.0557561
755	'MRPL28'	0.0192809	0.0558926
756	'MRPL32'	0.0192833	0.0558926
761	'HOG1'	0.0194116	0.0559657
762	'YEL007W'	0.0194746	0.0560736
763	'MRPL16'	0.0195569	0.0562368
772	'LEO1'	0.020138	0.0572068
774	'MNN11'	0.0202397	0.0573731
776	'NPR2'	0.0203632	0.0575356
778	'YLR426W'	0.0204019	0.0575356
780	'TRP1'	0.0205593	0.0577178
781	'MRPS28'	0.0205617	0.0577178
792	'EDC2'	0.0211186	0.058437
793	'RIM101'	0.021184	0.058437
799	'DAT1'	0.0213293	0.058437
800	'YCL001W-A'	0.0213511	0.058437
801	'VPS74'	0.0213608	0.058437
805	'HPC2'	0.0214891	0.058437
807	'GIS2'	0.0215206	0.058437
808	'ATG9'	0.0215206	0.058437
809	'YDL073W'	0.0215545	0.0584567
814	'SCP160'	0.0218789	0.0588406
815	'YNL296W'	0.0218814	0.0588406
816	'YOR200W'	0.0218838	0.0588406
817	'MRC1_p'	0.0219467	0.0589111
819	'SPT8'	0.0220751	0.0591035
822	'MRS2'	0.0222688	0.0594387
832	'STP2'	0.0229564	0.0605377
834	'ERG5'	0.0230387	0.0606091
837	'ESC2'	0.0231646	0.0607219
840	'PEP4'	0.0233922	0.0610964
848	'TAZ1'	0.0239274	0.0619076
854	'SUM1'	0.0243656	0.0625316
856	'SNG1'	0.0244262	0.0626075
857	'YER139C'	0.0245109	0.0627514
862	'SRO9'	0.0248232	0.0631277
863	'HYR1'	0.0248305	0.0631277
864	'CRC1'	0.0248959	0.0632206
865	'FUM1'	0.0250533	0.0634431
867	'FIR1'	0.0250702	0.0634431
868	'PDA1'	0.0251743	0.0636331
869	'OST3'	0.0252082	0.0636455
872	'ABZ2'	0.0253124	0.0636885
874	'RXT3'	0.0256513	0.0643937
875	'CIS1'	0.0257119	0.0644097
876	'FMP22'	0.0257191	0.0644097
879	'FMC1'	0.026046	0.0649434
887	'BNI5'	0.0265278	0.0655302
898	'RXT2'	0.0273632	0.0668282
899	'MSC2'	0.0273826	0.0668282
900	'YML082W'	0.0274818	0.0669959
902	'LHP1'	0.0276973	0.0673716
904	'RTT106'	0.0278184	0.0674174
911	'KRE11'	0.0279927	0.0674174
912	'BFR1'	0.0281356	0.0676204
921	'DPL1'	0.0284286	0.0676345
928	'YBR209W'	0.0287942	0.0680772
930	'RPL31B'	0.0289128	0.0681983
935	'VAC17_p'	0.029063	0.0681983
936	'SDS3'	0.0292131	0.0684685
942	'YMR171C'	0.029431	0.0684829
943	'ATG29'	0.0294528	0.0684829
944	'LYS2'	0.0294867	0.0684829
945	'ATG2'	0.0294964	0.0684829
947	'YLL059C'	0.0297554	0.0689385
949	'RNY1'	0.0298547	0.0690227
955	'OPT1'	0.0302252	0.069395
956	'PKH3'	0.0302397	0.069395
958	'SNC2'	0.0303317	0.0693998
963	'MRM1'	0.0306295	0.0697232
967	'YBR284W'	0.0308886	0.0700837
968	'LPE10'	0.0309467	0.070143
975	'MSC6'	0.0312833	0.0702762
977	'YPL066W'	0.0313535	0.0702762
980	'GRX2'	0.0313898	0.0702762
983	'PET54'	0.0315787	0.0704832
991	'ABF2'	0.0321622	0.0711162
992	'EMI5'	0.0321743	0.0711162
993	'ALT1'	0.0321864	0.0711162
995	'THR4'	0.0324407	0.0714757
997	'GEA1'	0.0324794	0.0714757
1002	'GSH1'	0.0330339	0.0721006
1011	'OXA1'	0.0334068	0.0724984
1014	'YGR043C'	0.0335763	0.0725843
1015	'VPS41'	0.0335787	0.0725843
1018	'APM1'	0.0336998	0.0726157
1023	'YDL177C'	0.0338838	0.0726208
1034	'COQ10'	0.0343995	0.0729423
1035	'YPL158C'	0.0344092	0.0729423
1036	'YOR1'	0.0346683	0.0734206
1037	'KEL2'	0.0350484	0.0741541
1047	'MAP2'	0.035632	0.0745718
1050	'YAK1'	0.0358789	0.0749714
1053	'ATG14'	0.0360509	0.075116
1054	'YML096W'	0.0362421	0.0754429
1064	'RSC1'	0.0369007	0.0760919
1070	'YML030W'	0.0373753	0.0766114
1074	'VPS21'	0.0376465	0.0767837
1083	'YBP2'	0.0382978	0.0775873
1086	'SAG1'	0.0385327	0.0778475
1091	'FTR1'	0.0388644	0.0781544
1097	'TUB3'	0.0393874	0.0787764
1099	'YEL008W'	0.0395908	0.0789727
1100	'YNL184C'	0.0395956	0.0789727
1103	'ATP18'	0.0398063	0.0791811
1105	'YJL211C'	0.040092	0.0795334
1106	'RPI1'	0.0401307	0.0795334
1107	'ATG8'	0.0401622	0.0795334
1108	'PFK26'	0.0401647	0.0795334
1114	'YLR091W'	0.04046	0.0796868
1115	'ARG4'	0.0405884	0.0798678
1117	'YGR071C'	0.0409734	0.0804037
1122	'CKI1'	0.041862	0.0818601
1131	'ALY2'	0.0422107	0.081885
1132	'VPS68'	0.0423414	0.0820661
1137	'YDL119C'	0.0428814	0.0827305
1142	'NHA1'	0.0431283	0.0828594
1153	'FSH1'	0.0438281	0.0834004
1156	'BPH1'	0.044	0.0835103
1157	'RMT2'	0.0440629	0.0835575
1158	'HSP12'	0.0442131	0.0836975
1163	'RMD6'	0.044661	0.0841374
1170	'ECM33'	0.0454649	0.0852581
1171	'CAC2'	0.0456029	0.0854438
1175	'PAM17'	0.0462155	0.0862968
1180	'EPS1'	0.0465351	0.0865017
1181	'YGR219W'	0.0465617	0.0865017
1182	'HGH1'	0.046661	0.0866128
1183	'YJR120W'	0.046799	0.0867656
1185	'GOS1'	0.046862	0.0867656
1191	'YGR168C'	0.0478693	0.088184
1194	'PEX29'	0.0482058	0.088529
1195	'YGL034C'	0.0482179	0.088529
1200	'CPR6'	0.0485351	0.0887233
1211	'CGR1'	0.0493656	0.0894387
1213	'ANT1'	0.0494697	0.0894796
1215	'GAS5'	0.0497579	0.089797
1220	'PET123'	0.050109	0.0901157
1221	'MHR1'	0.0502179	0.0902377
1225	'HOS2'	0.0508232	0.0910273
1228	'ERV14'	0.0513414	0.0917307
1234	'FET3'	0.0518717	0.0922275
1246	'AVT5'	0.0524915	0.0924205
1255	'CSM1'	0.053799	0.0940537
1258	'ELA1'	0.0542542	0.0946233
1268	'YMR316C-A'	0.0554504	0.0959467
1270	'YCK1'	0.0557167	0.0962558
1277	'YLR012C'	0.0564116	0.096837
1310	'PPS1'	0.0601041	0.100665
1315	'NCR1'	0.0604867	0.10092
1326	'YDL050C'	0.0621235	0.10277
1333	'YLR334C'	0.062937	0.103591
1335	'RAS2'	0.0630363	0.103599
1340	'YND1'	0.0635666	0.104039
1341	'TIR3'	0.0635884	0.104039
1343	'RTT107'	0.0638717	0.104346
1345	'YGR021W'	0.0640194	0.104432
1349	'CAT5'	0.0646247	0.105069
1354	'XBP1'	0.0653535	0.1059
1355	'MET12'	0.0654746	0.105951
1359	'HAM1'	0.065678	0.106003
1367	'MDM32'	0.0667627	0.107155
1369	'VPS29'	0.0671525	0.107623
1370	'YOL159C'	0.0676368	0.10832
1371	'AMD1'	0.0677748	0.108433
1372	'MGS1'	0.0678063	0.108433
1375	'SEC72'	0.0687772	0.109746
1376	'HAP3'	0.069	0.109945
1387	'YGR122W'	0.0698547	0.110501
1388	'OPI8'	0.0701041	0.110763
1392	'APJ1'	0.0704237	0.111
1394	'ARN2'	0.0707094	0.111291
1396	'YGR093W'	0.0710363	0.111645
1407	'MON2'	0.0728087	0.113536
1408	'BSC2'	0.0729855	0.113626
1412	'CAF130'	0.0734092	0.114067
1413	'RAD5'	0.0735254	0.114105
1419	'BUL2'	0.0744964	0.115061
1422	'FMP24'	0.0746078	0.115114
1427	'ENT1'	0.0758475	0.116577
1430	'NUC1'	0.0759806	0.116577
1434	'OMS1'	0.0763463	0.116811
1439	'FOB1'	0.0772107	0.117723
1440	'OYE2'	0.0775085	0.118095
1446	'SDC1'	0.0782784	0.118773
1450	'PMS1'	0.0786416	0.118864
1451	'YCL026C_d'	0.0786416	0.118864
1455	'YHR095W'	0.0789613	0.119068
1462	'VPS30'	0.0796683	0.119559
1465	'MDM31'	0.0800726	0.11992
1468	'YMR057C'	0.0802373	0.119921
1470	'ATG27'	0.0807409	0.120508
1477	'MSN4'	0.0811429	0.120508
1479	'KTR6'	0.0812494	0.120531
1508	'YCK2'	0.0852615	0.124007
1510	'YDR048C'	0.0855593	0.124318
1516	'FIS1'	0.0863099	0.124913
1519	'YLR218C'	0.0870218	0.125694
1527	'CCZ1'	0.0881429	0.126564
1532	'ATG5'	0.0885036	0.126712
1533	'SNT1'	0.0885351	0.126712
1536	'PBS2'	0.0891453	0.127213
1537	'ZRG17'	0.0892107	0.127213
1545	'SOD2'	0.0903559	0.128314
1549	'RTG1'	0.0906731	0.128432
1562	'YLR252W'	0.0924746	0.129893
1563	'YDL173W'	0.0926973	0.130123
1572	'YPL144W'	0.0940484	0.131264
1583	'IES1'	0.0955109	0.132355
1602	'SVL3'	0.0981404	0.13441
1621	'LST7'	0.101078	0.13681
1629	'RMD11'	0.102216	0.137444
1645	'PRY1'	0.105259	0.140391
1646	'CTH1'	0.105341	0.140415
1651	'KEL1'	0.106315	0.141225
1654	'PSR2'	0.106509	0.141225
1656	'SFA1'	0.106644	0.141293
1673	'YLR414C'	0.110562	0.144966
1674	'PSK2'	0.110605	0.144966
1676	'TDH3'	0.110784	0.145027
1687	'PDR17'	0.112172	0.145886
1697	'SWI4'	0.114228	0.147622
1707	'ELP4'	0.116206	0.149362
1710	'ATG12'	0.117014	0.150106
1717	'YEL025C'	0.118235	0.150965
1729	'ECM1'	0.120721	0.153192
1740	'RPL36A'	0.12254	0.154516
1752	'YME1'	0.125123	0.156693
1764	'APS1'	0.129605	0.161202
1771	'KNH1'	0.131015	0.16231
1781	'RNH70'	0.134017	0.165098
1815	'YDR348C'	0.138327	0.167215
1818	'YLR217W'	0.139053	0.167753
1821	'CRD1'	0.139397	0.167953
1825	'IGO2'	0.140443	0.168843
1835	'FEN2'	0.142942	0.17091
1837	'PEX2'	0.143504	0.171302
1846	'RIS1'	0.145758	0.173239
1848	'DCC1'	0.145998	0.173336
1850	'SWR1'	0.146944	0.174271
1868	'GEF1'	0.150114	0.176315
1869	'CAF20'	0.150402	0.176559
1871	'GYP6'	0.150811	0.17685
1872	'YGL218W'	0.150959	0.176928
1873	'ERV25'	0.151172	0.176928
1882	'YEH2'	0.152424	0.177696
1887	'SIF2'	0.153927	0.17874
1888	'NDI1'	0.153927	0.17874
1894	'IOC4'	0.154908	0.179299
1902	'RSF2'	0.156254	0.180246
1905	'RIM20'	0.156797	0.180517
1928	'YNR004W'	0.161862	0.184197
1932	'EAF7'	0.163605	0.185796
1933	'YJL182C'	0.164421	0.18635
1936	'YEL010W'	0.164484	0.18635
1945	'PSD2'	0.165397	0.186575
1948	'GPB2'	0.16606	0.187035
1949	'PUS4'	0.166339	0.187173
1963	'GDA1'	0.169453	0.189397
1971	'SBH2'	0.171467	0.190742
1972	'ATG18'	0.171509	0.190742
1984	'POT1'	0.174383	0.192725
1997	'YGR122C-A'	0.176215	0.193603
2000	'VPS62'	0.177322	0.194526
2004	'YCL056C'	0.179063	0.196044
2007	'PFA3'	0.179547	0.19628
2013	'MAF1'	0.18116	0.197453
2043	'SNF8'	0.186264	0.200035
2044	'CBT1'	0.186705	0.20041
2045	'KAR5'	0.186843	0.20046
2048	'TRM1'	0.187458	0.200623
2051	'SOH1'	0.187724	0.200623
2052	'MON1'	0.187782	0.200623
2064	'YBR134W'	0.189344	0.201189
2065	'VAM7'	0.189356	0.201189
2089	'ESBP6'	0.194743	0.204536
2097	'YML090W'	0.197337	0.206469
2099	'ICY2'	0.197692	0.206518
2107	'IES5'	0.200041	0.208267
2121	'ATG22'	0.202966	0.209942
2122	'YOR008C-A'	0.203155	0.209942
2125	'YKL023W'	0.203421	0.209942
2140	'YMR166C'	0.206368	0.211427
2143	'SRO7'	0.206509	0.211427
2157	'YCR087W'	0.210261	0.213872
2178	'ICE2'	0.217976	0.219581
2199	'YTA7'	0.222571	0.22207
2212	'RAD24'	0.225111	0.223284
2213	'MSS1'	0.22522	0.223291
2229	'HCM1'	0.230649	0.227032
2246	'UME1'	0.234862	0.229429
2258	'EMP46'	0.238792	0.231989
2265	'VPS35'	0.241237	0.23368
2299	'PEX3'	0.252777	0.241237
2310	'RPS18B'	0.255053	0.242178
2313	'ACH1'	0.255944	0.242734
2315	'SKT5'	0.256143	0.24276
2319	'YJR054W'	0.256981	0.243133
2324	'YMR193C-A'	0.259087	0.244599
2331	'ASM4'	0.262634	0.247119
2339	'ATP20'	0.264671	0.248266
2344	'ARL1'	0.265404	0.248425
2348	'PIN4'	0.26647	0.248937
2359	'FMP36'	0.268477	0.249703
2380	'RHR2'	0.274351	0.252915
2395	'YGK3'	0.278496	0.255058
2397	'ARG80'	0.278651	0.255058
2436	'QDR2'	0.290433	0.261586
2443	'FMP25'	0.292378	0.262583
2475	'SDH2'	0.30101	0.266764
2480	'DLD1'	0.302148	0.267308
2519	'RBS1'	0.317005	0.27611
2526	'YCL033C'	0.318269	0.276355
2547	'YGL057C'	0.324906	0.279881
2601	'NAS2'	0.340877	0.287446
2618	'YCR076C'	0.347002	0.290809
2628	'LYS12'	0.352489	0.294283
2631	'YNL143C'	0.353874	0.295103
2684	'MOT3'	0.375509	0.306878
2685	'PYC1'	0.375547	0.306878
2694	'BOP3'	0.378496	0.308114
2704	'YBL055C'	0.380973	0.3091
2705	'SRN2'	0.381085	0.3091
2717	'TAN1'	0.386806	0.312255
2836	'YIL064W'	0.43684	0.337957
2868	'PHO23'	0.453961	0.347284
2911	'NPP2'	0.465363	0.350748
2942	'AGE2'	0.484007	0.360871
2981	'CAP2'	0.500504	0.368375
2984	'YJR088C'	0.501794	0.368949
3043	'YJL022W'	0.528528	0.381076
3109	'TRK1'	0.557709	0.393554
3370	'YER064C'	0.677593	0.441148
3593	'PET309'	0.763913	0.466479
3767	'MSS51'	0.84206	0.490363
3806	'YLR169W'	0.857453	0.494096
